# Supplementary material for: Polar lows – moist-baroclinic cyclones developing in four different vertical wind shear environments
Source: Copernicus journal article supplement (doi:10.5194/wcd-2-19-2021), 2021-01-15
Supplement: Supplementary file 1 [file wcd-2-19-2021-supplement.zip]

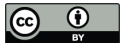

## *Supplement of*

# **Polar lows – moist-baroclinic cyclones developing in four different vertical wind shear environments**

**Patrick Johannes Stoll et al.**

*Correspondence to:* Patrick Johannes Stoll ([patrick.stoll@uit.no](mailto:patrick.stoll@uit.no))

- [wcd-2-19-2021-supplement-title-page.pdf](#)
- [Polar-low-list\\_Stoll\\_2020.csv](#)
- [Supplement.pdf](#)

The copyright of individual parts of the supplement might differ from the CC BY 4.0 License.
