# Supplementary material for: Polar lows – moist-baroclinic cyclones developing in four different vertical wind shear environments
Source: Copernicus journal article supplement (doi:10.5194/wcd-2-19-2021), 2021-01-15
Supplement: Supplementary file 3 [file wcd-2-19-2021-supplement.zip]

Archive with 3 entries (3 files):
- Supplement.pdf
- Polar-low-list_Stoll_2020.csv
- wcd-2-19-2021-supplement-title-page.pdf
