# Supplementary material for: Polar lows – moist-baroclinic cyclones developing in four different vertical wind shear environments
Source: Copernicus journal article supplement (doi:10.5194/wcd-2-19-2021), 2021-01-15
Supplement: Supplementary file 3 [file wcd-2-19-2021-supplement.zip › Polar-low-list_Stoll_2020.csv]

Polar_low_ID	time	Time_step	Longitude	Latitude	Vorticity_spatial-filtered	Sea-level-pressure	Duration	Lifetime_fraction	Vorticity_tendency
1_1	1999-12-18 22:00:00	1	13	75	0.00015543	993.67438	29	0	4.63421911421913E-06
1_1	1999-12-18 23:00:00	2	13	74.75	0.00017911	993.39374	29	0.03448275862069	5.2113752913753E-06
1_1	1999-12-19 00:00:00	3	13.5	74.5	0.00018	993.4881	29	0.068965517241379	5.78853146853148E-06
1_1	1999-12-19 01:00:00	4	14	74.25	0.00018446	992.83374	29	0.103448275862069	6.36568764568765E-06
1_1	1999-12-19 02:00:00	5	14.5	74	0.00018591	992.98187	29	0.137931034482759	6.94284382284382E-06
1_1	1999-12-19 03:00:00	6	15	73.75	0.00018841	992.6662	29	0.172413793103448	7.52E-06
1_1	1999-12-19 04:00:00	7	16.5	73.25	0.00019674	991.71625	29	0.206896551724138	7.49872727272727E-06
1_1	1999-12-19 05:00:00	8	17	73	0.00021388	991.51062	29	0.241379310344828	8.63990909090909E-06
1_1	1999-12-19 06:00:00	9	17	73	0.0002224	991.31372	29	0.275862068965517	9.08618181818182E-06
1_1	1999-12-19 07:00:00	10	17.5	72.75	0.00023498	991.08435	29	0.310344827586207	8.93981818181818E-06
1_1	1999-12-19 08:00:00	11	17.5	72.75	0.0002368	991.18182	29	0.344827586206896	7.96727272727273E-06
1_1	1999-12-19 09:00:00	12	17.5	72.5	0.00024864	991.31061	29	0.379310344827586	7.28718181818182E-06
1_1	1999-12-19 10:00:00	13	18	72.25	0.00026444	990.49121	29	0.413793103448276	7.14754545454545E-06
1_1	1999-12-19 11:00:00	14	18.5	72.25	0.00026515	990.49371	29	0.448275862068966	7.36781818181818E-06
1_1	1999-12-19 12:00:00	15	18.5	72	0.00026379	990.83997	29	0.482758620689655	6.72681818181818E-06
1_1	1999-12-19 13:00:00	16	18.5	71.75	0.00025974	990.36871	29	0.517241379310345	5.85836363636364E-06
1_1	1999-12-19 14:00:00	17	19	71.75	0.00027794	990.53998	29	0.551724137931034	4.36081818181818E-06
1_1	1999-12-19 15:00:00	18	19	71.5	0.00029774	990.21997	29	0.586206896551724	2.84027272727273E-06
1_1	1999-12-19 16:00:00	19	19	71.25	0.00030529	990.71307	29	0.620689655172414	1.95254545454545E-06
1_1	1999-12-19 17:00:00	20	19	71	0.0002944	990.75684	29	0.655172413793103	1.18554545454545E-06
1_1	1999-12-19 18:00:00	21	19.5	71	0.0002887	990.97058	29	0.689655172413793	-2.63909090909091E-07
1_1	1999-12-19 19:00:00	22	19.5	70.75	0.00028342	991.19995	29	0.724137931034483	-2.73036363636364E-06
1_1	1999-12-19 20:00:00	23	19.5	70.5	0.00027803	991.95874	29	0.758620689655172	-4.90472727272727E-06
1_1	1999-12-19 21:00:00	24	19	70.25	0.00027887	993.16687	29	0.793103448275862	-6.97572727272727E-06
1_1	1999-12-19 22:00:00	25	19	70	0.00028356	993.77875	29	0.827586206896552	-9.93436363636364E-06
1_1	1999-12-19 23:00:00	26	19	69.75	0.00027386	994.83936	29	0.862068965517241	-1.36390722610723E-05
1_1	1999-12-20 00:00:00	27	19	69.75	0.00025836	996.02313	29	0.896551724137931	-1.73437808857809E-05
1_1	1999-12-20 01:00:00	28	18.5	69.25	0.00024267	998.02124	29	0.931034482758621	-2.10484895104896E-05
1_1	1999-12-20 02:00:00	29	19	69.25	0.00021413	998.72247	29	0.96551724137931	-2.47531981351982E-05
1_1	1999-12-20 03:00:00	30	18.5	69	0.00016882	1000.33496	29	1	-2.84579067599068E-05
2_1	2000-01-19 00:00:00	1	34.5	72.5	0.0002801	997.14313	87	0	1.46436829836824E-06
2_1	2000-01-19 01:00:00	2	35	72.5	0.00027988	996.86932	87	0.011494252873563	4.05196736596732E-06
2_1	2000-01-19 02:00:00	3	35.5	72.5	0.00028779	996.29749	87	0.022988505747127	6.6395664335664E-06
2_1	2000-01-19 03:00:00	4	36	72.5	0.0002953	995.47626	87	0.03448275862069	9.22716550116547E-06
2_1	2000-01-19 04:00:00	5	36.5	72.75	0.00031607	995.19373	87	0.045977011494253	1.18147645687645E-05
2_1	2000-01-19 05:00:00	6	37	72.75	0.00033714	994.4931	87	0.057471264367816	1.44023636363636E-05
2_1	2000-01-19 06:00:00	7	37.5	72.75	0.00034182	994.38251	87	0.068965517241379	1.81252727272727E-05
2_1	2000-01-19 07:00:00	8	38	73	0.0003471	993.9212	87	0.080459770114943	2.0584E-05
2_1	2000-01-19 08:00:00	9	38.5	73	0.00036205	993.69623	87	0.091954022988506	2.14911818181818E-05
2_1	2000-01-19 09:00:00	10	39	73.25	0.00037175	993.95563	87	0.103448275862069	2.10593636363636E-05
2_1	2000-01-19 10:00:00	11	39	73.25	0.00045303	990.95123	87	0.114942528735632	2.18747272727273E-05
2_1	2000-01-19 11:00:00	12	39.5	73.5	0.00048019	989.9931	87	0.126436781609195	2.23917272727273E-05
2_1	2000-01-19 12:00:00	13	40	73.75	0.00049266	989.52557	87	0.137931034482759	2.10682727272727E-05
2_1	2000-01-19 13:00:00	14	40.5	74	0.00049159	989.10126	87	0.149425287356322	1.90380909090909E-05
2_1	2000-01-19 14:00:00	15	40.5	74	0.00049388	988.03998	87	0.160919540229885	1.65318181818182E-05
2_1	2000-01-19 15:00:00	16	40.5	74.25	0.00053611	987.90875	87	0.172413793103448	1.30229090909091E-05
2_1	2000-01-19 16:00:00	17	40.5	74.25	0.00054827	987.53809	87	0.183908045977011	1.30802727272727E-05
2_1	2000-01-19 17:00:00	18	41	74.5	0.00054439	986.14496	87	0.195402298850575	1.39183636363636E-05
2_1	2000-01-19 18:00:00	19	41	74.75	0.00056302	985.53375	87	0.206896551724138	1.4053E-05
2_1	2000-01-19 19:00:00	20	41	74.75	0.00057779	984.60938	87	0.218390804597701	1.10588181818182E-05
2_1	2000-01-19 20:00:00	21	41	74.75	0.00058724	984.27246	87	0.229885057471264	6.53327272727273E-06
2_1	2000-01-19 21:00:00	22	41	75	0.00061126	983.91437	87	0.241379310344828	2.93309090909091E-06
2_1	2000-01-19 22:00:00	23	41	75	0.00062749	981.60248	87	0.252873563218391	-1.42963636363636E-06
2_1	2000-01-19 23:00:00	24	41	75.25	0.00062651	981.25	87	0.264367816091954	-6.45418181818182E-06
2_1	2000-01-20 00:00:00	25	41	75.25	0.00058573	980.75372	87	0.275862068965517	-9.65763636363636E-06
2_1	2000-01-20 01:00:00	26	40.5	75.5	0.00056812	981.94122	87	0.28735632183908	-1.26254545454545E-05
2_1	2000-01-20 02:00:00	27	40.5	75.5	0.00055265	980.94061	87	0.298850574712644	-1.40990909090909E-05
2_1	2000-01-20 03:00:00	28	40.5	75.5	0.00052459	981.06683	87	0.310344827586207	-1.41168181818182E-05
2_1	2000-01-20 04:00:00	29	40.5	75.5	0.00050995	981.28436	87	0.32183908045977	-1.31074545454545E-05
2_1	2000-01-20 05:00:00	30	40.5	75.75	0.00052077	979.72937	87	0.333333333333333	-1.14452727272727E-05
2_1	2000-01-20 06:00:00	31	40.5	75.75	0.00049978	980.44312	87	0.344827586206897	-1.07022727272727E-05
2_1	2000-01-20 07:00:00	32	40	76	0.00050571	979.69995	87	0.35632183908046	-1.02253636363636E-05
2_1	2000-01-20 08:00:00	33	39.5	76	0.00049261	980.7937	87	0.367816091954023	-9.81618181818182E-06
2_1	2000-01-20 09:00:00	34	39.5	76	0.000472	981.83624	87	0.379310344827586	-1.03248181818182E-05
2_1	2000-01-20 10:00:00	35	39.5	76.25	0.00045644	981.21625	87	0.39080459770115	-1.12486363636364E-05
2_1	2000-01-20 11:00:00	36	39	76.25	0.00045114	982.65997	87	0.402298850574713	-1.09370909090909E-05
2_1	2000-01-20 12:00:00	37	39	76.5	0.0004395	983.43811	87	0.413793103448276	-1.10237272727273E-05
2_1	2000-01-20 13:00:00	38	38.5	76.5	0.00043085	984.35248	87	0.425287356321839	-1.01756363636364E-05
2_1	2000-01-20 14:00:00	39	38	76.5	0.00041997	984.55682	87	0.436781609195402	-9.24081818181818E-06
2_1	2000-01-20 15:00:00	40	37.5	76.5	0.00040748	985.52435	87	0.448275862068966	-8.44318181818182E-06
2_1	2000-01-20 16:00:00	41	37.5	76.5	0.00040118	986.45496	87	0.459770114942529	-8.15745454545454E-06
2_1	2000-01-20 17:00:00	42	37	76.5	0.00039369	987.20184	87	0.471264367816092	-7.3790909090909E-06
2_1	2000-01-20 18:00:00	43	37	76.5	0.00038592	987.78558	87	0.482758620689655	-6.67618181818181E-06
2_1	2000-01-20 19:00:00	44	36.5	76.5	0.00037959	988.5556	87	0.494252873563218	-6.12872727272727E-06
2_1	2000-01-20 20:00:00	45	36.5	76.5	0.0003787	989.36499	87	0.505747126436782	-5.894E-06
2_1	2000-01-20 21:00:00	46	36.5	76.5	0.00036745	989.98187	87	0.517241379310345	-5.57890909090909E-06
2_1	2000-01-20 22:00:00	47	36.5	76.5	0.00036685	988.97559	87	0.528735632183908	-5.16736363636363E-06
2_1	2000-01-20 23:00:00	48	36	76.5	0.0003623	989.16998	87	0.540229885057471	-5.03872727272727E-06
2_1	2000-01-21 00:00:00	49	36	76.25	0.00035382	990.39874	87	0.551724137931034	-5.48109090909091E-06
2_1	2000-01-21 01:00:00	50	36	76.25	0.00034459	991.36188	87	0.563218390804598	-6.134E-06
2_1	2000-01-21 02:00:00	51	36	76.25	0.00034627	991.54688	87	0.574712643678161	-6.36763636363636E-06
2_1	2000-01-21 03:00:00	52	36	76.25	0.00034371	992.06311	87	0.586206896551724	-6.60681818181818E-06
2_1	2000-01-21 04:00:00	53	36	76.25	0.00033498	992.38623	87	0.597701149425287	-6.45572727272727E-06
2_1	2000-01-21 05:00:00	54	36	76.25	0.00032	992.80811	87	0.609195402298851	-6.40218181818182E-06
2_1	2000-01-21 06:00:00	55	35.5	76.25	0.00030978	993.32745	87	0.620689655172414	-6.46554545454545E-06
2_1	2000-01-21 07:00:00	56	35.5	76.25	0.00030611	993.935	87	0.632183908045977	-6.52981818181818E-06
2_1	2000-01-21 08:00:00	57	35	76.25	0.00030497	994.30438	87	0.64367816091954	-6.47990909090909E-06
2_1	2000-01-21 09:00:00	58	35	76.25	0.00030178	994.76874	87	0.655172413793103	-5.94763636363637E-06
2_1	2000-01-21 10:00:00	59	34.5	76.25	0.00029208	996.17938	87	0.666666666666667	-5.649E-06
2_1	2000-01-21 11:00:00	60	34	76.25	0.00028564	996.22998	87	0.67816091954023	-5.40363636363636E-06
2_1	2000-01-21 12:00:00	61	33.5	76.25	0.00028306	996.60498	87	0.689655172413793	-5.46136363636363E-06
2_1	2000-01-21 13:00:00	62	33.5	76.25	0.00027125	997.18811	87	0.701149425287356	-5.17309090909091E-06
2_1	2000-01-21 14:00:00	63	33.5	76	0.00026993	996.9787	87	0.71264367816092	-4.50472727272727E-06
2_1	2000-01-21 15:00:00	64	33	76	0.00026051	997.4212	87	0.724137931034483	-3.76690909090909E-06
2_1	2000-01-21 16:00:00	65	33	75.75	0.00026242	997.17938	87	0.735632183908046	-3.23918181818182E-06
2_1	2000-01-21 17:00:00	66	33	75.5	0.0002565	997.28809	87	0.747126436781609	-2.495E-06
2_1	2000-01-21 18:00:00	67	32.5	75.5	0.00025786	997.58624	87	0.758620689655172	-2.20545454545454E-06
2_1	2000-01-21 19:00:00	68	32.5	75.25	0.00025794	997.51434	87	0.770114942528736	-2.05881818181818E-06
2_1	2000-01-21 20:00:00	69	32.5	75	0.00025389	997.3725	87	0.781609195402299	-1.75863636363636E-06
2_1	2000-01-21 21:00:00	70	32	75	0.00025133	997.59375	87	0.793103448275862	-2.087E-06
2_1	2000-01-21 22:00:00	71	31.5	74.75	0.00025567	997.26434	87	0.804597701149425	-2.14345454545454E-06
2_1	2000-01-21 23:00:00	72	31.5	74.5	0.00024277	997.2937	87	0.816091954022988	-2.42209090909091E-06
2_1	2000-01-22 00:00:00	73	30.5	74.25	0.00024574	997.30499	87	0.827586206896552	-2.81209090909091E-06
2_1	2000-01-22 01:00:00	74	30.5	74	0.0002456	997.47247	87	0.839080459770115	-3.01090909090909E-06
2_1	2000-01-22 02:00:00	75	30.5	73.75	0.00023821	996.57562	87	0.850574712643678	-3.16927272727273E-06
2_1	2000-01-22 03:00:00	76	30.5	73.5	0.00023744	995.93683	87	0.862068965517241	-3.41554545454545E-06
2_1	2000-01-22 04:00:00	77	30	73.25	0.00023466	996.14874	87	0.873563218390805	-3.18845454545454E-06
2_1	2000-01-22 05:00:00	78	30	72.75	0.00022621	995.70184	87	0.885057471264368	-3.90681818181818E-06
2_1	2000-01-22 06:00:00	79	30	72.5	0.00022399	995.3775	87	0.896551724137931	-4.22845454545455E-06
2_1	2000-01-22 07:00:00	80	29.5	72.25	0.00022295	995.65375	87	0.908045977011494	-4.85472727272727E-06
2_1	2000-01-22 08:00:00	81	29.5	71.75	0.0002179	995.5481	87	0.919540229885058	-5.91754545454545E-06
2_1	2000-01-22 09:00:00	82	29.5	71.5	0.00021642	995.63873	87	0.931034482758621	-7.14236363636364E-06
2_1	2000-01-22 10:00:00	83	29.5	71	0.00020325	995.94812	87	0.942528735632184	-7.87063636363636E-06
2_1	2000-01-22 11:00:00	84	29.5	70.75	0.00020051	996.94	87	0.954022988505747	-9.29168531468533E-06
2_1	2000-01-22 12:00:00	85	29.5	70.25	0.00018493	997.6225	87	0.96551724137931	-1.07127342657343E-05
2_1	2000-01-22 13:00:00	86	29.5	70	0.00017206	997.80872	87	0.977011494252874	-1.21337832167832E-05
2_1	2000-01-22 14:00:00	87	29	69.5	0.00015619	998.34058	87	0.988505747126437	-1.35548321678322E-05
2_1	2000-01-22 15:00:00	88	28.5	68.75	0.0001542	1000.12622	87	1	-1.49758811188811E-05
3_1	2000-01-30 06:00:00	1	-15.5	63.25	0.00023548	988.08435	43	0	1.03060909090909E-05
3_1	2000-01-30 07:00:00	2	-15.5	63.5	0.00026046	986.96808	43	0.023255813953488	1.10960909090909E-05
3_1	2000-01-30 08:00:00	3	-15	63.75	0.00027727	986.02625	43	0.046511627906977	1.18860909090909E-05
3_1	2000-01-30 09:00:00	4	-14.5	63.75	0.00028576	985.08246	43	0.069767441860465	1.26760909090909E-05
3_1	2000-01-30 10:00:00	5	-14	64	0.00030247	984.3606	43	0.093023255813954	1.34660909090909E-05
3_1	2000-01-30 11:00:00	6	-13.5	64.25	0.00030503	982.76123	43	0.116279069767442	1.42560909090909E-05
3_1	2000-01-30 12:00:00	7	-13	64.5	0.00030963	982.07996	43	0.13953488372093	1.29661818181818E-05
3_1	2000-01-30 13:00:00	8	-12.5	64.75	0.00032056	981.06433	43	0.162790697674419	1.14514545454545E-05
3_1	2000-01-30 14:00:00	9	-12	65	0.00035775	980.80438	43	0.186046511627907	9.85127272727273E-06
3_1	2000-01-30 15:00:00	10	-11.5	65	0.00038859	979.83246	43	0.209302325581395	8.36036363636364E-06
3_1	2000-01-30 16:00:00	11	-11	65	0.00038297	978.94562	43	0.232558139534884	7.26309090909091E-06
3_1	2000-01-30 17:00:00	12	-10	65	0.00037424	978.99683	43	0.255813953488372	7.94972727272727E-06
3_1	2000-01-30 18:00:00	13	-9	65	0.00036707	979.12811	43	0.279069767441861	6.61254545454546E-06
3_1	2000-01-30 19:00:00	14	-8	65	0.00036634	979.54309	43	0.302325581395349	3.70836363636364E-06
3_1	2000-01-30 20:00:00	15	-7	65	0.00037637	979.55811	43	0.325581395348837	2.666E-06
3_1	2000-01-30 21:00:00	16	-6	65	0.0003831	979.66809	43	0.348837209302326	2.92890909090909E-06
3_1	2000-01-30 22:00:00	17	-4.5	65	0.0004354	980.28186	43	0.372093023255814	2.97E-06
3_1	2000-01-30 23:00:00	18	-3.5	65	0.00041143	980.13062	43	0.395348837209302	2.22890909090909E-06
3_1	2000-01-31 00:00:00	19	-2.5	65	0.0003842	979.91058	43	0.418604651162791	2.00318181818182E-06
3_1	2000-01-31 01:00:00	20	-1	65	0.00039326	979.22937	43	0.441860465116279	2.33309090909091E-06
3_1	2000-01-31 02:00:00	21	0	65	0.00039207	978.58563	43	0.465116279069767	3.712E-06
3_1	2000-01-31 03:00:00	22	1	65	0.00039463	978.03186	43	0.488372093023256	6.02909090909091E-06
3_1	2000-01-31 04:00:00	23	2.5	65	0.00039023	977.3562	43	0.511627906976744	1.05882727272727E-05
3_1	2000-01-31 05:00:00	24	3.5	65	0.00041337	977.00061	43	0.534883720930233	1.32142727272727E-05
3_1	2000-01-31 06:00:00	25	5	65	0.00043573	976.23871	43	0.558139534883721	1.50644545454545E-05
3_1	2000-01-31 07:00:00	26	6	65	0.00046065	975.93872	43	0.581395348837209	1.395E-05
3_1	2000-01-31 08:00:00	27	7	65	0.00049007	975.31934	43	0.604651162790698	8.03227272727273E-06
3_1	2000-01-31 09:00:00	28	8.5	65	0.00049803	974.66687	43	0.627906976744186	3.76454545454548E-07
3_1	2000-01-31 10:00:00	29	9.5	64.75	0.00049679	974.0412	43	0.651162790697674	-9.59545454545454E-06
3_1	2000-01-31 11:00:00	30	11	64.75	0.00052947	974.7912	43	0.674418604651163	-2.05371818181818E-05
3_1	2000-01-31 12:00:00	31	12	64.75	0.00048243	977.01062	43	0.697674418604651	-2.764E-05
3_1	2000-01-31 13:00:00	32	13.5	64.5	0.00039602	978.54059	43	0.72093023255814	-3.14028181818182E-05
3_1	2000-01-31 14:00:00	33	15.5	64.25	0.0003555	979.19061	43	0.744186046511628	-3.21720909090909E-05
3_1	2000-01-31 15:00:00	34	17	64.25	0.000302	980.41187	43	0.767441860465116	-3.18004545454545E-05
3_1	2000-01-31 16:00:00	35	19	64	0.00023525	979.88995	43	0.790697674418605	-3.01996363636364E-05
3_1	2000-01-31 17:00:00	36	21	63.5	0.00025725	980.25751	43	0.813953488372093	-2.48549090909091E-05
3_1	2000-01-31 18:00:00	37	22	63.25	0.00026513	981.02875	43	0.837209302325581	-1.94396363636364E-05
3_1	2000-01-31 19:00:00	38	23	63.25	0.00025658	981.24188	43	0.86046511627907	-1.58773636363636E-05
3_1	2000-01-31 20:00:00	39	24	63	0.00022543	981.92749	43	0.883720930232558	-1.28642727272727E-05
3_1	2000-01-31 21:00:00	40	25.5	62.75	0.00019944	982.57434	43	0.906976744186046	-1.29380955710956E-05
3_1	2000-01-31 22:00:00	41	27	62.75	0.00018312	981.85498	43	0.930232558139535	-1.30119184149184E-05
3_1	2000-01-31 23:00:00	42	28.5	62.75	0.00017185	981.90625	43	0.953488372093023	-1.30857412587413E-05
3_1	2000-02-01 00:00:00	43	29.5	62.75	0.00017266	982.09436	43	0.976744186046512	-1.31595641025641E-05
3_1	2000-02-01 01:00:00	44	31	62.75	0.00016453	981.91187	43	1	-1.3233386946387E-05
4_1	2000-03-08 01:00:00	1	18.5	71.25	0.00015249	992.88434	32	0	2.21689976689977E-06
4_1	2000-03-08 02:00:00	2	18.5	71.25	0.00015724	992.84747	32	0.033333333333333	2.17806526806527E-06
4_1	2000-03-08 03:00:00	3	18	71.25	0.00015955	993.34558	32	0.066666666666667	2.13923076923077E-06
4_1	2000-03-08 04:00:00	4	18	71.25	0.00016435	993.53876	32	0.1	2.10039627039627E-06
4_1	2000-03-08 05:00:00	5	18	70.75	0.00016473	993.10748	32	0.133333333333333	2.06156177156176E-06
4_1	2000-03-08 06:00:00	6	17.5	71	0.00016381	993.44873	32	0.166666666666667	2.02272727272727E-06
4_1	2000-03-08 07:00:00	7	17.5	70.75	0.00016107	993.3775	32	0.2	1.973E-06
4_1	2000-03-08 08:00:00	8	17	71	0.0001685	993.68121	32	0.233333333333333	2.33818181818182E-06
4_1	2000-03-08 09:00:00	9	16.5	71	0.00017291	993.9256	32	0.266666666666667	2.51781818181818E-06
4_1	2000-03-08 10:00:00	10	16	71.25	0.00017586	994.35059	32	0.3	3.00136363636364E-06
4_1	2000-03-08 11:00:00	11	16	70.75	0.00017315	994.0025	32	0.333333333333333	3.304E-06
4_1	2000-03-08 12:00:00	12	15	71.25	0.00017865	994.20184	32	0.366666666666667	3.50009090909091E-06
4_1	2000-03-08 13:00:00	13	15	71	0.00018731	994.3587	32	0.4	3.32E-06
4_1	2000-03-08 14:00:00	14	14.5	71	0.00018647	994.755	32	0.433333333333333	3.27418181818182E-06
4_1	2000-03-08 15:00:00	15	14	71	0.00019278	994.84808	32	0.466666666666667	5.08863636363636E-06
4_1	2000-03-08 16:00:00	16	13.5	71	0.00019403	995.03625	32	0.5	6.30427272727273E-06
4_1	2000-03-08 17:00:00	17	13	70.75	0.00019865	995.02124	32	0.533333333333333	6.58772727272727E-06
4_1	2000-03-08 18:00:00	18	12.5	70.75	0.00020063	995.56622	32	0.566666666666667	6.18972727272727E-06
4_1	2000-03-08 19:00:00	19	12.5	70.25	0.00020258	995.00873	32	0.6	5.904E-06
4_1	2000-03-08 22:00:00	20	12.5	68.75	0.00024503	993.97998	32	0.633333333333333	5.65354545454545E-06
4_1	2000-03-08 23:00:00	21	12.5	68.5	0.00024274	994.01434	32	0.666666666666667	5.329E-06
4_1	2000-03-09 00:00:00	22	12.5	68.25	0.00023886	993.97125	32	0.7	4.25218181818182E-06
4_1	2000-03-09 01:00:00	23	13	67.75	0.00023041	993.99561	32	0.733333333333333	2.34881818181818E-06
4_1	2000-03-09 02:00:00	24	13	67.5	0.00023284	993.98187	32	0.766666666666667	-5.17454545454545E-07
4_1	2000-03-09 03:00:00	25	13	67	0.00024373	994.35748	32	0.8	-4.53672727272727E-06
4_1	2000-03-09 04:00:00	26	13	66.75	0.00024598	994.65625	32	0.833333333333333	-7.23409090909091E-06
4_1	2000-03-09 05:00:00	27	13	66.25	0.00023857	995.84998	32	0.866666666666667	-1.08586363636364E-05
4_1	2000-03-09 06:00:00	28	13	65.75	0.00022375	997.01434	32	0.9	-1.44831818181818E-05
4_1	2000-03-09 07:00:00	29	13	65.5	0.00020521	997.98499	32	0.933333333333333	-1.81077272727273E-05
4_1	2000-03-09 08:00:00	30	13	65	0.00017842	999.02124	32	0.966666666666667	-2.17322727272727E-05
4_1	2000-03-09 09:00:00	31	13	64.75	0.00015173	999.75061	32	1	-2.53568181818181E-05
5_1	2000-03-23 20:00:00	1	22	74.25	0.0001505	994.83435	34	0	1.45763333333333E-05
5_1	2000-03-23 21:00:00	2	21.5	74	0.00015499	995.28436	34	0.029411764705882	1.28960303030303E-05
5_1	2000-03-23 22:00:00	3	21.5	74	0.00017494	995.58246	34	0.058823529411765	1.12157272727273E-05
5_1	2000-03-23 23:00:00	4	21.5	74	0.00018791	995.71997	34	0.088235294117647	9.53542424242423E-06
5_1	2000-03-24 00:00:00	5	21.5	73.75	0.00019825	995.90057	34	0.117647058823529	7.8551212121212E-06
5_1	2000-03-24 01:00:00	6	21.5	73.75	0.00020103	996.06311	34	0.147058823529412	6.17481818181818E-06
5_1	2000-03-24 02:00:00	7	21.5	73.5	0.00020586	995.9856	34	0.176470588235294	5.19945454545455E-06
5_1	2000-03-24 03:00:00	8	21.5	73.5	0.00020645	995.92438	34	0.205882352941176	4.36009090909091E-06
5_1	2000-03-24 04:00:00	9	21.5	73.5	0.00020451	996.2937	34	0.235294117647059	4.30663636363636E-06
5_1	2000-03-24 05:00:00	10	21.5	73.25	0.00021171	996.24622	34	0.264705882352941	4.46554545454545E-06
5_1	2000-03-24 06:00:00	11	21.5	73.25	0.00021429	996.4306	34	0.294117647058823	4.87254545454545E-06
5_1	2000-03-24 07:00:00	12	21.5	73	0.00022003	996.6925	34	0.323529411764706	5.38663636363636E-06
5_1	2000-03-24 08:00:00	13	21.5	73	0.00023154	997.25061	34	0.352941176470588	5.95463636363636E-06
5_1	2000-03-24 09:00:00	14	22	72.75	0.0002402	997.06372	34	0.382352941176471	5.98263636363636E-06
5_1	2000-03-24 10:00:00	15	22	72.5	0.00024236	997.15558	34	0.411764705882353	5.512E-06
5_1	2000-03-24 11:00:00	16	22	72.5	0.0002463	997.7962	34	0.441176470588235	4.81109090909091E-06
5_1	2000-03-24 12:00:00	17	22	72.25	0.00025493	998.06311	34	0.470588235294118	4.04654545454545E-06
5_1	2000-03-24 13:00:00	18	22	72	0.0002611	998.30188	34	0.5	2.83181818181818E-06
5_1	2000-03-24 14:00:00	19	22	71.75	0.00025956	999.01312	34	0.529411764705882	1.50972727272727E-06
5_1	2000-03-24 15:00:00	20	22.5	71.5	0.00026154	998.57812	34	0.558823529411765	-4.01818181818176E-08
5_1	2000-03-24 16:00:00	21	23	71.5	0.00025924	998.62561	34	0.588235294117647	-1.76772727272727E-06
5_1	2000-03-24 17:00:00	22	23	71.25	0.00026425	998.9375	34	0.617647058823529	-3.59590909090909E-06
5_1	2000-03-24 18:00:00	23	23.5	71	0.00025745	999.33746	34	0.647058823529412	-5.65E-06
5_1	2000-03-24 19:00:00	24	24	71	0.00024876	999.32812	34	0.676470588235294	-6.78518181818182E-06
5_1	2000-03-24 20:00:00	25	24.5	70.75	0.0002368	1000.02557	34	0.705882352941176	-7.104E-06
5_1	2000-03-24 21:00:00	26	24.5	70.75	0.00022962	1000.46625	34	0.735294117647059	-7.33254545454545E-06
5_1	2000-03-24 22:00:00	27	25	70.75	0.00022013	1000.67688	34	0.764705882352941	-7.34427272727273E-06
5_1	2000-03-24 23:00:00	28	25.5	70.5	0.00019957	1000.68872	34	0.794117647058823	-7.01463636363636E-06
5_1	2000-03-25 00:00:00	29	27	69.5	0.00020131	1001.68683	34	0.823529411764706	-7.178E-06
5_1	2000-03-25 01:00:00	30	27	69.25	0.00020916	1001.92621	34	0.852941176470588	-7.47763636363636E-06
5_1	2000-03-25 02:00:00	31	27.5	68.75	0.00019869	1003.10248	34	0.882352941176471	-8.11786946386947E-06
5_1	2000-03-25 03:00:00	32	27.5	68.75	0.00019365	1002.84937	34	0.911764705882353	-8.75810256410257E-06
5_1	2000-03-25 04:00:00	33	27.5	68.75	0.00018203	1002.92371	34	0.941176470588235	-9.39833566433567E-06
5_1	2000-03-25 05:00:00	34	28	68.5	0.0001629	1003.49432	34	0.970588235294117	-1.00385687645688E-05
5_1	2000-03-25 06:00:00	35	28	68.75	0.00015142	1003.31061	34	1	-1.06788018648019E-05
6_1	2001-01-01 06:00:00	1	11.5	72.25	0.00015645	989.15686	4	0	2.60138571428571E-05
6_1	2001-01-01 07:00:00	2	12	72.5	0.00016965	988.92188	4	0.25	1.45924285714285E-05
6_1	2001-01-01 08:00:00	3	12.5	72.75	0.00018159	989.07935	4	0.5	3.17100000000006E-06
6_1	2001-01-01 09:00:00	4	12.5	73	0.00018714	989.20245	4	0.75	-8.25042857142856E-06
6_1	2001-01-01 10:00:00	5	13	73.25	0.00016356	990.59247	4	1	-1.96718571428571E-05
6_2	2000-12-30 00:00:00	1	-19.5	63	0.00015979	1006.6875	119	0	2.36800815850816E-05
6_2	2000-12-30 01:00:00	2	-19	63	0.00019696	1006.0437	119	0.008403361344538	2.06676107226107E-05
6_2	2000-12-30 02:00:00	3	-18.5	62.75	0.00022071	1004.83246	119	0.016806722689076	1.76551398601399E-05
6_2	2000-12-30 03:00:00	4	-18.5	62.75	0.00025004	1004.33063	119	0.025210084033614	1.4642668997669E-05
6_2	2000-12-30 04:00:00	5	-18	62.5	0.00025725	1003.6275	119	0.033613445378151	1.16301981351981E-05
6_2	2000-12-30 05:00:00	6	-18	62.5	0.00026151	1003.40936	119	0.042016806722689	8.61772727272727E-06
6_2	2000-12-30 06:00:00	7	-18	62.5	0.00025211	1003.55933	119	0.050420168067227	6.62245454545455E-06
6_2	2000-12-30 07:00:00	8	-17.5	62.25	0.00024772	1002.88562	119	0.058823529411765	5.07618181818182E-06
6_2	2000-12-30 08:00:00	9	-17	62.25	0.0002551	1002.99371	119	0.067226890756303	4.53654545454545E-06
6_2	2000-12-30 09:00:00	10	-16	62	0.00025555	1002.63373	119	0.07563025210084	4.78236363636364E-06
6_2	2000-12-30 10:00:00	11	-15	61.75	0.00028383	1001.2981	119	0.084033613445378	4.75627272727273E-06
6_2	2000-12-30 11:00:00	12	-15	61.75	0.00029247	1001.80499	119	0.092436974789916	4.67163636363636E-06
6_2	2000-12-30 12:00:00	13	-14	61.5	0.00028428	1001.13373	119	0.100840336134454	4.34209090909091E-06
6_2	2000-12-30 13:00:00	14	-14	61.5	0.00029539	1001.2381	119	0.109243697478992	3.42345454545454E-06
6_2	2000-12-30 14:00:00	15	-13.5	61.5	0.00029241	1001.12122	119	0.117647058823529	2.61409090909091E-06
6_2	2000-12-30 15:00:00	16	-13	61.5	0.00028625	1001.05933	119	0.126050420168067	1.41390909090909E-06
6_2	2000-12-30 16:00:00	17	-12	61.5	0.00028565	1000.38684	119	0.134453781512605	1.53363636363636E-06
6_2	2000-12-30 17:00:00	18	-11	61.5	0.00029637	999.72748	119	0.142857142857143	1.20490909090909E-06
6_2	2000-12-30 18:00:00	19	-10.5	61.5	0.00029753	999.60437	119	0.151260504201681	1.38090909090909E-06
6_2	2000-12-30 19:00:00	20	-9.5	61.5	0.00030104	999.06683	119	0.159663865546219	2.973E-06
6_2	2000-12-30 20:00:00	21	-9	61.5	0.00030109	998.62122	119	0.168067226890756	5.05318181818182E-06
6_2	2000-12-30 21:00:00	22	-9	61.5	0.0003053	998.38062	119	0.176470588235294	6.94363636363636E-06
6_2	2000-12-30 22:00:00	23	-8	61.5	0.00028936	998.18933	119	0.184873949579832	7.40436363636364E-06
6_2	2000-12-30 23:00:00	24	-7.5	61.5	0.00030967	997.96808	119	0.19327731092437	7.34236363636364E-06
6_2	2000-12-31 00:00:00	25	-6.5	61.5	0.00033257	997.78436	119	0.201680672268908	7.25827272727273E-06
6_2	2000-12-31 01:00:00	26	-6	61.5	0.00035432	997.1106	119	0.210084033613445	6.907E-06
6_2	2000-12-31 02:00:00	27	-5.5	61.5	0.00036992	996.50751	119	0.218487394957983	6.45518181818182E-06
6_2	2000-12-31 03:00:00	28	-5	61.5	0.00035592	995.94122	119	0.226890756302521	6.15372727272727E-06
6_2	2000-12-31 04:00:00	29	-3.5	61.75	0.00034561	995.06622	119	0.235294117647059	5.13572727272727E-06
6_2	2000-12-31 05:00:00	30	-2.5	62	0.00035358	994.26495	119	0.243697478991597	6.49745454545454E-06
6_2	2000-12-31 06:00:00	31	-1.5	62.25	0.0003547	993.42871	119	0.252100840336134	8.07945454545454E-06
6_2	2000-12-31 07:00:00	32	-0.5	62.5	0.00036316	992.52997	119	0.260504201680672	8.80609090909091E-06
6_2	2000-12-31 08:00:00	33	0	62.75	0.00037383	992.13	119	0.26890756302521	8.90363636363636E-06
6_2	2000-12-31 09:00:00	34	1	63	0.0003909	991.87561	119	0.277310924369748	9.22136363636364E-06
6_2	2000-12-31 10:00:00	35	2	63.5	0.00043919	989.54749	119	0.285714285714286	1.08590909090909E-05
6_2	2000-12-31 11:00:00	36	2.5	63.75	0.00044246	988.6062	119	0.294117647058824	1.1906E-05
6_2	2000-12-31 12:00:00	37	3.5	64.75	0.00041952	987.74121	119	0.302521008403361	1.14690909090909E-05
6_2	2000-12-31 13:00:00	38	4	65.25	0.0004	985.72626	119	0.310924369747899	1.07122727272727E-05
6_2	2000-12-31 14:00:00	39	4	66	0.00042766	984.42688	119	0.319327731092437	9.10890909090909E-06
6_2	2000-12-31 15:00:00	40	4.5	66.25	0.00048342	982.98621	119	0.327731092436975	8.17145454545454E-06
6_2	2000-12-31 16:00:00	41	4.5	66.75	0.00048842	980.87061	119	0.336134453781513	9.48727272727272E-06
6_2	2000-12-31 17:00:00	42	4.5	67	0.0004814	979.52063	119	0.34453781512605	1.07089090909091E-05
6_2	2000-12-31 18:00:00	43	4.5	67.25	0.00048955	978.65625	119	0.352941176470588	1.03134545454545E-05
6_2	2000-12-31 19:00:00	44	4	67.5	0.0004834	978.27875	119	0.361344537815126	6.43009090909091E-06
6_2	2000-12-31 20:00:00	45	4	67.75	0.00049948	978.48059	119	0.369747899159664	1.16027272727273E-06
6_2	2000-12-31 21:00:00	46	4.5	68	0.00051282	979.01123	119	0.378151260504202	-1.54818181818182E-06
6_2	2000-12-31 22:00:00	47	5	68.25	0.00052155	978.66058	119	0.38655462184874	-5.09372727272727E-06
6_2	2000-12-31 23:00:00	48	5	68.25	0.00052932	979.19183	119	0.394957983193277	-9.09072727272727E-06
6_2	2001-01-01 00:00:00	49	5.5	68.5	0.00049797	979.01062	119	0.403361344537815	-1.17827272727273E-05
6_2	2001-01-01 01:00:00	50	6	68.5	0.00045387	979.65186	119	0.411764705882353	-1.34209090909091E-05
6_2	2001-01-01 02:00:00	51	7	68.75	0.00044855	980.24561	119	0.420168067226891	-1.28824545454545E-05
6_2	2001-01-01 03:00:00	52	8	68.75	0.00041716	981.43372	119	0.428571428571429	-1.04445454545455E-05
6_2	2001-01-01 04:00:00	53	9	69.25	0.0004014	981.88184	119	0.436974789915966	-7.21281818181818E-06
6_2	2001-01-01 05:00:00	54	9.5	69.5	0.00040433	982.26184	119	0.445378151260504	-3.29209090909091E-06
6_2	2001-01-01 06:00:00	55	10.5	69.75	0.00041785	982.86932	119	0.453781512605042	7.47000000000001E-07
6_2	2001-01-01 07:00:00	56	11.5	70	0.00043333	983.29938	119	0.46218487394958	2.00136363636364E-06
6_2	2001-01-01 08:00:00	57	12.5	70.25	0.00044588	983.93683	119	0.470588235294118	2.88154545454545E-06
6_2	2001-01-01 09:00:00	58	13.5	70.5	0.00043948	984.505	119	0.478991596638655	2.19709090909091E-06
6_2	2001-01-01 10:00:00	59	14	71	0.0004289	984.3125	119	0.487394957983193	1.3218181818182E-07
6_2	2001-01-01 11:00:00	60	15	71.25	0.00044904	984.005	119	0.495798319327731	-2.44963636363636E-06
6_2	2001-01-01 12:00:00	61	16	71.5	0.00043091	984.47687	119	0.504201680672269	-4.83590909090909E-06
6_2	2001-01-01 13:00:00	62	17	71.75	0.00042447	985.1731	119	0.512605042016807	-6.88909090909091E-06
6_2	2001-01-01 14:00:00	63	18	72	0.0004229	985.58374	119	0.521008403361345	-8.15245454545454E-06
6_2	2001-01-01 15:00:00	64	19	72.25	0.00041259	986.24371	119	0.529411764705882	-9.34781818181818E-06
6_2	2001-01-01 16:00:00	65	19.5	72.5	0.00039994	986.58936	119	0.53781512605042	-1.06851818181818E-05
6_2	2001-01-01 17:00:00	66	20.5	72.75	0.00038714	987.15875	119	0.546218487394958	-8.943E-06
6_2	2001-01-01 18:00:00	67	21.5	73	0.00036975	987.56061	119	0.554621848739496	-8.04818181818182E-06
6_2	2001-01-01 19:00:00	68	22.5	73.25	0.00035935	987.76562	119	0.563025210084034	-7.96536363636363E-06
6_2	2001-01-01 20:00:00	69	23.5	73.5	0.00035122	988.49683	119	0.571428571428571	-7.781E-06
6_2	2001-01-01 21:00:00	70	24	73.75	0.00034314	988.82874	119	0.579831932773109	-7.436E-06
6_2	2001-01-01 22:00:00	71	25	74.25	0.00036957	989.13434	119	0.588235294117647	-6.99727272727273E-06
6_2	2001-01-01 23:00:00	72	25.5	74.5	0.00035679	989.20874	119	0.596638655462185	-6.77181818181818E-06
6_2	2001-01-02 00:00:00	73	26	74.75	0.00033183	989.17371	119	0.605042016806723	-7.13281818181818E-06
6_2	2001-01-02 01:00:00	74	26.5	75	0.00031742	989.80621	119	0.61344537815126	-7.86190909090909E-06
6_2	2001-01-02 02:00:00	75	27	75.5	0.00031223	989.28308	119	0.621848739495798	-8.54490909090909E-06
6_2	2001-01-02 03:00:00	76	27.5	75.75	0.0003094	989.9231	119	0.630252100840336	-9.24736363636364E-06
6_2	2001-01-02 04:00:00	77	28	76	0.00030196	990.11121	119	0.638655462184874	-7.63681818181818E-06
6_2	2001-01-02 05:00:00	78	28	76.25	0.00029289	989.92499	119	0.647058823529412	-5.99872727272727E-06
6_2	2001-01-02 06:00:00	79	28	76.75	0.0002819	989.91187	119	0.65546218487395	-5.00345454545454E-06
6_2	2001-01-02 07:00:00	80	28	77	0.00027718	989.77625	119	0.663865546218487	-4.56127272727273E-06
6_2	2001-01-02 08:00:00	81	28	77.5	0.00027164	989.95123	119	0.672268907563025	-4.04363636363636E-06
6_2	2001-01-02 09:00:00	82	28	77.75	0.00027651	989.98187	119	0.680672268907563	-3.15754545454545E-06
6_2	2001-01-02 10:00:00	83	27	78	0.00027384	990.05872	119	0.689075630252101	-2.43363636363637E-06
6_2	2001-01-02 11:00:00	84	27	78.25	0.00027306	990.40747	119	0.697478991596639	-2.48554545454546E-06
6_2	2001-01-02 12:00:00	85	26.5	78.5	0.00026643	989.82684	119	0.705882352941176	-2.99690909090909E-06
6_2	2001-01-02 13:00:00	86	26.5	79	0.00026412	990.48187	119	0.714285714285714	-2.87545454545455E-06
6_2	2001-01-02 14:00:00	87	26	79	0.000266	989.78625	119	0.722689075630252	-2.46454545454545E-06
6_2	2001-01-02 15:00:00	88	26	79.25	0.00026268	989.64062	119	0.73109243697479	-2.14863636363636E-06
6_2	2001-01-02 16:00:00	89	25.5	79.5	0.00024864	990.00311	119	0.739495798319328	-1.85536363636363E-06
6_2	2001-01-02 17:00:00	90	24.5	79.75	0.00024287	990.1756	119	0.747899159663866	-1.75963636363636E-06
6_2	2001-01-02 18:00:00	91	24	80	0.00025465	989.99683	119	0.756302521008403	-1.60218181818182E-06
6_2	2001-01-02 19:00:00	92	24	80.25	0.00026316	989.45245	119	0.764705882352941	-4.39999999999998E-07
6_2	2001-01-02 20:00:00	93	24.5	80.25	0.00025353	989.82495	119	0.773109243697479	1.16545454545455E-06
6_2	2001-01-02 21:00:00	94	24.5	80.5	0.00025164	989.84808	119	0.781512605042017	1.83645454545454E-06
6_2	2001-01-02 22:00:00	95	23.5	80.75	0.00024379	990.95624	119	0.789915966386555	1.35172727272727E-06
6_2	2001-01-02 23:00:00	96	22	81	0.00024725	990.75751	119	0.798319327731092	5.31363636363635E-07
6_2	2001-01-03 00:00:00	97	21.5	81	0.00026829	990.66376	119	0.80672268907563	1.80090909090906E-07
6_2	2001-01-03 01:00:00	98	21.5	81.25	0.00027662	991.33746	119	0.815126050420168	1.46090909090907E-07
6_2	2001-01-03 02:00:00	99	21	81.5	0.00026217	990.52875	119	0.823529411764706	-4.4518181818182E-07
6_2	2001-01-03 03:00:00	100	20	81.5	0.00025349	990.67749	119	0.831932773109244	-1.45690909090909E-06
6_2	2001-01-03 04:00:00	101	19.5	81.75	0.000254	990.64996	119	0.840336134453782	-2.94172727272727E-06
6_2	2001-01-03 05:00:00	102	19	81.75	0.00025241	990.68372	119	0.848739495798319	-4.70572727272727E-06
6_2	2001-01-03 06:00:00	103	18.5	82	0.00024873	990.86371	119	0.857142857142857	-5.12527272727273E-06
6_2	2001-01-03 07:00:00	104	17.5	82	0.00024514	991.065	119	0.865546218487395	-4.872E-06
6_2	2001-01-03 08:00:00	105	17	82.25	0.00023648	991.36688	119	0.873949579831933	-5.37909090909091E-06
6_2	2001-01-03 09:00:00	106	17	82.25	0.00023246	991.73059	119	0.882352941176471	-6.137E-06
6_2	2001-01-03 10:00:00	107	17	82.25	0.0002199	992.34686	119	0.890756302521008	-6.562E-06
6_2	2001-01-03 11:00:00	108	17	82.5	0.00021876	992.97058	119	0.899159663865546	-6.74227272727273E-06
6_2	2001-01-03 12:00:00	109	16.5	82.5	0.00021366	993.16937	119	0.907563025210084	-6.75509090909091E-06
6_2	2001-01-03 13:00:00	110	15.5	82.75	0.00020168	993.25812	119	0.915966386554622	-6.40327272727273E-06
6_2	2001-01-03 14:00:00	111	15	82.75	0.00019448	993.46246	119	0.92436974789916	-6.00427272727273E-06
6_2	2001-01-03 15:00:00	112	14.5	83	0.00018939	994.03058	119	0.932773109243698	-5.59936363636364E-06
6_2	2001-01-03 16:00:00	113	14.5	83	0.00018376	994.40247	119	0.941176470588235	-5.53190909090909E-06
6_2	2001-01-03 17:00:00	114	14.5	83	0.00017813	995.08563	119	0.949579831932773	-5.12454545454546E-06
6_2	2001-01-03 18:00:00	115	14.5	83.25	0.00017634	995.62372	119	0.957983193277311	-4.57454545454545E-06
6_2	2001-01-03 19:00:00	116	14.5	83.25	0.00017401	995.89374	119	0.966386554621849	-4.38433566433566E-06
6_2	2001-01-03 20:00:00	117	15	83.25	0.00016647	996.83875	119	0.974789915966386	-4.19412587412587E-06
6_2	2001-01-03 21:00:00	118	15	83.5	0.00016092	997.25433	119	0.983193277310924	-4.00391608391608E-06
6_2	2001-01-03 22:00:00	119	15.5	83.5	0.00015797	998.6062	119	0.991596638655462	-3.81370629370628E-06
6_2	2001-01-03 23:00:00	120	16	83.5	0.00015507	999.06183	119	1	-3.62349650349649E-06
7_1	2001-02-04 01:00:00	1	1.5	61.25	0.00016297	1011.6037	31	0	1.70128601398601E-05
7_1	2001-02-04 02:00:00	2	1.5	61.25	0.00017521	1011.33807	31	0.032258064516129	1.64203426573427E-05
7_1	2001-02-04 03:00:00	3	1.5	61.25	0.00018179	1010.88562	31	0.064516129032258	1.58278251748252E-05
7_1	2001-02-04 04:00:00	4	1.5	61.25	0.00019611	1010.26935	31	0.096774193548387	1.52353076923077E-05
7_1	2001-02-04 05:00:00	5	1.5	61.25	0.00020935	1009.81873	31	0.129032258064516	1.46427902097902E-05
7_1	2001-02-04 06:00:00	6	1.5	61.5	0.00022902	1009.64935	31	0.161290322580645	1.40502727272727E-05
7_1	2001-02-04 07:00:00	7	1.5	61.5	0.00025498	1009.26996	31	0.193548387096774	1.23209090909091E-05
7_1	2001-02-04 08:00:00	8	1	61.75	0.0002708	1009.02185	31	0.225806451612903	9.73945454545455E-06
7_1	2001-02-04 09:00:00	9	1	61.75	0.0002794	1008.88873	31	0.258064516129032	6.19172727272728E-06
7_1	2001-02-04 10:00:00	10	0.5	62	0.00028972	1008.63312	31	0.290322580645161	2.27172727272727E-06
7_1	2001-02-04 11:00:00	11	0.5	62.25	0.0002829	1008.85187	31	0.32258064516129	-1.07890909090909E-06
7_1	2001-02-04 12:00:00	12	0	62.5	0.00027284	1009.34625	31	0.354838709677419	-3.56990909090909E-06
7_1	2001-02-04 13:00:00	13	0	62.5	0.00026138	1008.61688	31	0.387096774193548	-4.99345454545454E-06
7_1	2001-02-04 14:00:00	14	-0.5	62.75	0.00024946	1008.56311	31	0.419354838709677	-5.54690909090909E-06
7_1	2001-02-04 15:00:00	15	-1.5	62.75	0.00023762	1008.4856	31	0.451612903225806	-5.84390909090909E-06
7_1	2001-02-04 16:00:00	16	-2	63	0.00024256	1008.37433	31	0.483870967741936	-5.41227272727273E-06
7_1	2001-02-04 17:00:00	17	-2.5	63	0.00024451	1008.22058	31	0.516129032258065	-3.73627272727273E-06
7_1	2001-02-04 18:00:00	18	-3	63.25	0.00023994	1008.43311	31	0.548387096774194	-2.72809090909091E-06
7_1	2001-02-04 19:00:00	19	-4	63.25	0.00023709	1008.34808	31	0.580645161290323	-2.54172727272727E-06
7_1	2001-02-04 20:00:00	20	-4.5	63.25	0.00022567	1007.86438	31	0.612903225806452	-3.09E-06
7_1	2001-02-04 21:00:00	21	-5.5	63.25	0.00021857	1007.67059	31	0.645161290322581	-4.15890909090909E-06
7_1	2001-02-04 22:00:00	22	-6.5	63.5	0.0002399	1007.2381	31	0.67741935483871	-4.72636363636364E-06
7_1	2001-02-04 23:00:00	23	-7.5	63.5	0.00022868	1006.8681	31	0.709677419354839	-4.71809090909091E-06
7_1	2001-02-05 00:00:00	24	-8	63.5	0.00021552	1006.76685	31	0.741935483870968	-4.51436363636364E-06
7_1	2001-02-05 01:00:00	25	-9	63.5	0.00020449	1005.84375	31	0.774193548387097	-4.22754545454546E-06
7_1	2001-02-05 02:00:00	26	-10	63.5	0.00019825	1005.92621	31	0.806451612903226	-4.84618181818182E-06
7_1	2001-02-05 03:00:00	27	-11	63.5	0.00019548	1005.76746	31	0.838709677419355	-6.42881818181818E-06
7_1	2001-02-05 04:00:00	28	-12.5	63.25	0.00019639	1004.88251	31	0.870967741935484	-6.29723310023312E-06
7_1	2001-02-05 05:00:00	29	-13.5	63.25	0.00019655	1004.79559	31	0.903225806451613	-6.16564801864804E-06
7_1	2001-02-05 06:00:00	30	-14.5	63.25	0.00019312	1004.7337	31	0.935483870967742	-6.03406293706296E-06
7_1	2001-02-05 07:00:00	31	-15.5	63	0.00017811	1003.72498	31	0.967741935483871	-5.90247785547789E-06
7_1	2001-02-05 08:00:00	32	-16.5	63	0.00015591	1003.97058	31	1	-5.77089277389281E-06
8_1	2001-02-05 06:00:00	1	8	68.75	0.00016083	1011.42621	56	0	1.98164941724942E-05
8_1	2001-02-05 07:00:00	2	7	68.75	0.00019785	1009.92249	56	0.017857142857143	1.85038135198135E-05
8_1	2001-02-05 08:00:00	3	6	68.25	0.00021661	1008.15558	56	0.035714285714286	1.71911328671329E-05
8_1	2001-02-05 09:00:00	4	5	68	0.0002285	1006.8031	56	0.053571428571429	1.58784522144522E-05
8_1	2001-02-05 10:00:00	5	4	67.5	0.00024607	1004.59497	56	0.071428571428572	1.45657715617716E-05
8_1	2001-02-05 11:00:00	6	3.5	67.25	0.00025009	1002.81122	56	0.089285714285714	1.32530909090909E-05
8_1	2001-02-05 12:00:00	7	2.5	66.75	0.00026162	1001.14246	56	0.107142857142857	1.19604545454545E-05
8_1	2001-02-05 13:00:00	8	2	66.5	0.00027464	999.63934	56	0.125	1.16461818181818E-05
8_1	2001-02-05 14:00:00	9	1	66	0.00028508	998.57996	56	0.142857142857143	1.14602727272727E-05
8_1	2001-02-05 15:00:00	10	1	65.75	0.00029875	997.29248	56	0.160714285714286	1.1226E-05
8_1	2001-02-05 16:00:00	11	0.5	65.25	0.00030903	996.09125	56	0.178571428571429	1.18758181818182E-05
8_1	2001-02-05 17:00:00	12	0.5	65	0.00032438	994.89435	56	0.196428571428571	1.31634545454545E-05
8_1	2001-02-05 18:00:00	13	0.5	64.75	0.00033419	993.43622	56	0.214285714285714	1.47102727272727E-05
8_1	2001-02-05 19:00:00	14	0.5	64.5	0.00034177	992.32434	56	0.232142857142857	1.59818181818182E-05
8_1	2001-02-05 20:00:00	15	0.5	64.25	0.00035147	991.40125	56	0.25	1.73457272727273E-05
8_1	2001-02-05 21:00:00	16	1	64	0.00037443	990.87683	56	0.267857142857143	1.7984E-05
8_1	2001-02-05 22:00:00	17	1	63.75	0.00040931	989.50873	56	0.285714285714286	1.71852727272727E-05
8_1	2001-02-05 23:00:00	18	1	63.75	0.00043302	988.73999	56	0.303571428571429	1.46380909090909E-05
8_1	2001-02-06 00:00:00	19	1	63.75	0.00044562	987.88623	56	0.321428571428571	1.11036363636364E-05
8_1	2001-02-06 01:00:00	20	1	63.75	0.00046932	987.38184	56	0.339285714285714	6.41209090909091E-06
8_1	2001-02-06 02:00:00	21	1.5	63.75	0.0004738	987.1756	56	0.357142857142857	1.38454545454546E-06
8_1	2001-02-06 03:00:00	22	1.5	63.75	0.00046486	986.67059	56	0.375	-3.083E-06
8_1	2001-02-06 04:00:00	23	2	63.75	0.00043914	986.21875	56	0.392857142857143	-6.27936363636364E-06
8_1	2001-02-06 05:00:00	24	2	63.75	0.0004286	985.95245	56	0.410714285714286	-8.74190909090909E-06
8_1	2001-02-06 06:00:00	25	2	63.75	0.00041293	985.44745	56	0.428571428571429	-8.98509090909091E-06
8_1	2001-02-06 07:00:00	26	2.5	63.75	0.00040813	985.1925	56	0.446428571428571	-6.701E-06
8_1	2001-02-06 08:00:00	27	2.5	63.75	0.00040423	984.74561	56	0.464285714285714	-3.80109090909091E-06
8_1	2001-02-06 09:00:00	28	3	63.75	0.0003963	984.70184	56	0.482142857142857	-1.01127272727273E-06
8_1	2001-02-06 10:00:00	29	3	63.75	0.00038139	984.66559	56	0.5	1.25318181818182E-06
8_1	2001-02-06 11:00:00	30	3.5	64	0.00040477	984.34808	56	0.517857142857143	3.43172727272727E-06
8_1	2001-02-06 12:00:00	31	4	64.25	0.00042376	983.91125	56	0.535714285714286	4.43763636363636E-06
8_1	2001-02-06 13:00:00	32	4	64.5	0.00042282	982.08313	56	0.553571428571429	4.67936363636364E-06
8_1	2001-02-06 14:00:00	33	4.5	64.5	0.00042093	981.75751	56	0.571428571428571	4.35754545454545E-06
8_1	2001-02-06 15:00:00	34	4.5	64.75	0.00043145	981.02625	56	0.589285714285714	3.83154545454545E-06
8_1	2001-02-06 16:00:00	35	4.5	65	0.00044067	980.72437	56	0.607142857142857	1.43009090909091E-06
8_1	2001-02-06 17:00:00	36	4.5	65.25	0.00043609	980.40686	56	0.625	3.0636363636362E-08
8_1	2001-02-06 18:00:00	37	4.5	65.5	0.00042967	980.26996	56	0.642857142857143	-1.06190909090909E-06
8_1	2001-02-06 19:00:00	38	4.5	65.5	0.00042626	980.0575	56	0.660714285714286	-3.21245454545454E-06
8_1	2001-02-06 20:00:00	39	4	65.75	0.00043569	979.31183	56	0.678571428571429	-5.552E-06
8_1	2001-02-06 21:00:00	40	4	65.75	0.0004202	979.70435	56	0.696428571428571	-6.78727272727273E-06
8_1	2001-02-06 22:00:00	41	4	66	0.00042195	979.18182	56	0.714285714285714	-7.26109090909091E-06
8_1	2001-02-06 23:00:00	42	3.5	66	0.00040935	979.24249	56	0.732142857142857	-7.71127272727273E-06
8_1	2001-02-07 00:00:00	43	3.5	66.25	0.00038432	979.30188	56	0.75	-8.32145454545455E-06
8_1	2001-02-07 01:00:00	44	3.5	66.25	0.00037473	978.89313	56	0.767857142857143	-9.07554545454546E-06
8_1	2001-02-07 02:00:00	45	3	66.5	0.00037716	978.88184	56	0.785714285714286	-8.43563636363636E-06
8_1	2001-02-07 03:00:00	46	3	66.5	0.00037199	978.72437	56	0.803571428571429	-8.18827272727273E-06
8_1	2001-02-07 04:00:00	47	3	66.75	0.00036427	978.82684	56	0.821428571428572	-7.679E-06
8_1	2001-02-07 05:00:00	48	3	66.75	0.00035409	979.04871	56	0.839285714285714	-7.42563636363636E-06
8_1	2001-02-07 06:00:00	49	2.5	67	0.0003399	979.36621	56	0.857142857142857	-8.18881818181818E-06
8_1	2001-02-07 07:00:00	50	2	67	0.00034198	979.42688	56	0.875	-9.40063636363636E-06
8_1	2001-02-07 08:00:00	51	1.5	67	0.00033319	979.80872	56	0.892857142857143	-1.00736363636364E-05
8_1	2001-02-07 09:00:00	52	1	67	0.00031945	980.69434	56	0.910714285714286	-1.0675E-05
8_1	2001-02-07 10:00:00	53	0.5	67	0.00030844	980.47626	56	0.928571428571428	-1.15280769230769E-05
8_1	2001-02-07 11:00:00	54	0.5	67	0.00029593	981.40875	56	0.946428571428571	-1.23811538461539E-05
8_1	2001-02-07 12:00:00	55	0	67	0.00027989	981.81433	56	0.964285714285714	-1.32342307692308E-05
8_1	2001-02-07 13:00:00	56	-1	66.75	0.00026986	982.13934	56	0.982142857142857	-1.40873076923077E-05
8_1	2001-02-07 14:00:00	57	-1.5	66.5	0.00025618	982.31934	56	1	-1.49403846153846E-05
9_1	2001-03-02 10:00:00	1	47	75	0.00019465	1006.21063	28	0	-9.94179487179494E-07
9_1	2001-03-02 11:00:00	2	47.5	75	0.00022004	1005.57935	28	0.027777777777778	-4.52198135198142E-07
9_1	2001-03-02 12:00:00	3	48.5	75.25	0.00021844	1005.23248	28	0.055555555555556	8.97832167832106E-08
9_1	2001-03-02 13:00:00	4	49	75.25	0.00020995	1004.55249	28	0.083333333333333	6.31764568764563E-07
9_1	2001-03-02 14:00:00	5	50	75.5	0.00020236	1004.21436	28	0.111111111111111	1.17374592074591E-06
9_2	2001-03-02 02:00:00	1	31	73.25	0.00015956	1007.08875	11	0	1.59809906759907E-05
9_2	2001-03-02 03:00:00	2	31.5	73.25	0.00016974	1006.81433	11	0.090909090909091	1.37085198135198E-05
9_2	2001-03-02 04:00:00	3	32.5	73.25	0.00017887	1006.35059	11	0.181818181818182	1.14360489510489E-05
9_2	2001-03-02 05:00:00	4	33.5	73.25	0.00019058	1006.21063	11	0.272727272727273	9.16357808857808E-06
9_2	2001-03-02 06:00:00	5	34	73.25	0.00019929	1006.23749	11	0.363636363636364	6.89110722610721E-06
9_2	2001-03-02 07:00:00	6	35.5	73.5	0.0002066	1005.78809	11	0.454545454545455	4.61863636363636E-06
9_2	2001-03-02 08:00:00	7	36.5	73.5	0.00021608	1005.83496	11	0.545454545454545	2.77472727272727E-06
9_2	2001-03-02 09:00:00	8	37.5	73.5	0.00022524	1005.52808	11	0.636363636363636	4.29365967365955E-07
9_2	2001-03-02 10:00:00	9	39.5	73.75	0.00019975	1007.10187	11	0.727272727272727	-1.91599533799535E-06
9_2	2001-03-02 11:00:00	10	41	73.75	0.00020284	1006.7381	11	0.818181818181818	-4.26135664335665E-06
9_2	2001-03-02 12:00:00	11	42.5	74	0.00020494	1006.76874	11	0.909090909090909	-6.60671794871795E-06
9_2	2001-03-02 13:00:00	12	44	74	0.00019866	1006.20996	11	1	-8.95207925407926E-06
9_1	2001-03-02 19:00:00	6	51	76.75	0.00018879	1002.59998	28	0.472222222222222	1.71572727272727E-06
9_1	2001-03-02 20:00:00	7	50.5	76.75	0.00020658	1003.17621	28	0.5	1.28090909090909E-06
9_1	2001-03-02 21:00:00	8	50.5	76.75	0.00022592	1003.42621	28	0.527777777777778	2.31618181818182E-06
9_1	2001-03-02 22:00:00	9	50.5	77	0.00022492	1003.17999	28	0.555555555555556	3.07190909090909E-06
9_1	2001-03-02 23:00:00	10	51	77	0.00022336	1003.71307	28	0.583333333333333	2.77627272727273E-06
9_1	2001-03-03 00:00:00	11	53	76.75	0.00021862	1003.09686	28	0.611111111111111	1.50054545454545E-06
9_1	2001-03-03 01:00:00	12	55	76.75	0.00022358	1003.88934	28	0.638888888888889	-9.24090909090908E-07
9_1	2001-03-03 02:00:00	13	55.5	76.75	0.00023124	1004.04999	28	0.666666666666667	-2.66663636363636E-06
9_1	2001-03-03 03:00:00	14	55	77	0.00022925	1005.29559	28	0.694444444444444	-3.45181818181818E-06
9_1	2001-03-03 04:00:00	15	56	77	0.00021847	1005.59625	28	0.722222222222222	-4.23527272727273E-06
9_1	2001-03-03 05:00:00	16	57	77	0.00020772	1005.96185	28	0.75	-5.04E-06
9_1	2001-03-03 06:00:00	17	57.5	77	0.0001998	1006.17688	28	0.777777777777778	-5.65090909090909E-06
9_1	2001-03-03 07:00:00	18	58	77	0.00019566	1006.62433	28	0.805555555555556	-5.60854545454545E-06
9_1	2001-03-03 08:00:00	19	58.5	77	0.00019133	1007.28375	28	0.833333333333333	-5.11790909090909E-06
9_1	2001-03-03 09:00:00	20	58.5	77	0.00018565	1007.91937	28	0.861111111111111	-4.83136363636364E-06
9_1	2001-03-03 10:00:00	21	59	77	0.0001792	1009.48749	28	0.888888888888889	-4.53278554778555E-06
9_1	2001-03-03 11:00:00	22	60	77.25	0.00018032	1010.37122	28	0.916666666666667	-4.23420745920747E-06
9_1	2001-03-03 12:00:00	23	60.5	77.25	0.00018108	1010.89313	28	0.944444444444444	-3.93562937062938E-06
9_1	2001-03-03 13:00:00	24	61	77.25	0.00017325	1011.20563	28	0.972222222222222	-3.63705128205129E-06
9_1	2001-03-03 14:00:00	25	61.5	77.25	0.00015955	1011.84686	28	1	-3.3384731934732E-06
10_1	2001-03-19 10:00:00	1	10.5	75.5	0.00016451	1010.03375	46	0	1.11444125874126E-05
10_1	2001-03-19 11:00:00	2	10	75.5	0.00017236	1009.90747	46	0.021739130434783	1.08405664335664E-05
10_1	2001-03-19 12:00:00	3	10	75.5	0.00018122	1009.36871	46	0.043478260869565	1.05367202797203E-05
10_1	2001-03-19 13:00:00	4	9.5	75.5	0.00019048	1009.34937	46	0.065217391304348	1.02328741258741E-05
10_1	2001-03-19 14:00:00	5	9	75.5	0.00020004	1008.53687	46	0.086956521739131	9.92902797202797E-06
10_1	2001-03-19 15:00:00	6	9	75.5	0.00021379	1008.26123	46	0.108695652173913	9.62518181818182E-06
10_1	2001-03-19 16:00:00	7	8.5	75.25	0.00022375	1007.42621	46	0.130434782608696	8.68754545454546E-06
10_1	2001-03-19 17:00:00	8	8.5	75.25	0.0002366	1006.99121	46	0.152173913043478	7.197E-06
10_1	2001-03-19 18:00:00	9	8	75.25	0.00024516	1006.65558	46	0.173913043478261	5.30409090909091E-06
10_1	2001-03-19 19:00:00	10	7.5	75.25	0.00024671	1006.69434	46	0.195652173913043	3.69845454545454E-06
10_1	2001-03-19 20:00:00	11	7	75	0.00025523	1006.0506	46	0.217391304347826	2.31427272727273E-06
10_1	2001-03-19 21:00:00	12	6.5	75	0.00024793	1005.90558	46	0.239130434782609	8.62999999999999E-07
10_1	2001-03-19 22:00:00	13	6	74.75	0.00024303	1006.07062	46	0.260869565217391	-6.27363636363637E-07
10_1	2001-03-19 23:00:00	14	5.5	74.5	0.00023768	1005.90125	46	0.282608695652174	-1.49118181818182E-06
10_1	2001-03-20 00:00:00	15	5	74.25	0.00024418	1005.47125	46	0.304347826086956	-1.92018181818182E-06
10_1	2001-03-20 01:00:00	16	4.5	74	0.00024832	1005.27997	46	0.326086956521739	-2.17827272727273E-06
10_1	2001-03-20 02:00:00	17	4	73.75	0.00024	1005.33063	46	0.347826086956522	-1.63363636363636E-06
10_1	2001-03-20 03:00:00	18	4	73.25	0.00023243	1005.21436	46	0.369565217391304	-1.09227272727273E-06
10_1	2001-03-20 04:00:00	19	4	73	0.00023253	1004.87372	46	0.391304347826087	-1.81272727272726E-07
10_1	2001-03-20 05:00:00	20	4.5	72.75	0.00023101	1004.12622	46	0.413043478260869	9.56090909090911E-07
10_1	2001-03-20 06:00:00	21	4	72.25	0.00023008	1004.91376	46	0.434782608695652	1.55881818181818E-06
10_1	2001-03-20 07:00:00	22	4.5	72	0.00023419	1004.17621	46	0.456521739130435	1.61627272727273E-06
10_1	2001-03-20 08:00:00	23	5	71.75	0.00023867	1003.65808	46	0.478260869565217	1.34336363636364E-06
10_1	2001-03-20 09:00:00	24	5	71.25	0.00025083	1004.08936	46	0.5	3.5209090909091E-07
10_1	2001-03-20 10:00:00	25	5.5	71	0.00026379	1002.82935	46	0.521739130434783	-8.91545454545454E-07
10_1	2001-03-20 11:00:00	26	5.5	70.5	0.00024945	1003.34058	46	0.543478260869565	-1.674E-06
10_1	2001-03-20 12:00:00	27	6	70.25	0.00023354	1003.25934	46	0.565217391304348	-2.785E-06
10_1	2001-03-20 13:00:00	28	6.5	69.75	0.0002333	1003.25812	46	0.58695652173913	-3.85063636363636E-06
10_1	2001-03-20 14:00:00	29	7	69.5	0.00022524	1003.02374	46	0.608695652173913	-4.32490909090909E-06
10_1	2001-03-20 15:00:00	30	7	68.75	0.00021813	1004.29749	46	0.630434782608696	-3.58127272727273E-06
10_1	2001-03-20 16:00:00	31	8	68.75	0.00022722	1003.04749	46	0.652173913043478	-1.99236363636364E-06
10_1	2001-03-20 17:00:00	32	8.5	68.5	0.00022035	1003.22058	46	0.673913043478261	-2.0290909090909E-07
10_1	2001-03-20 18:00:00	33	9	68.25	0.00021447	1003.06683	46	0.695652173913043	8.9209090909091E-07
10_1	2001-03-20 19:00:00	34	9.5	67.75	0.00021816	1003.32874	46	0.717391304347826	2.12863636363636E-06
10_1	2001-03-20 20:00:00	35	10	67.5	0.00022626	1003.24811	46	0.739130434782609	2.47545454545455E-06
10_1	2001-03-20 21:00:00	36	10.5	67.25	0.00022439	1002.86249	46	0.760869565217391	2.01972727272727E-06
10_1	2001-03-20 22:00:00	37	11	67	0.00023813	1001.45996	46	0.782608695652174	1.14954545454546E-06
10_1	2001-03-20 23:00:00	38	11	67	0.00023968	1001.52496	46	0.804347826086956	-7.32545454545455E-07
10_1	2001-03-21 00:00:00	39	11.5	66.75	0.00024431	1001.32996	46	0.826086956521739	-3.06E-06
10_1	2001-03-21 01:00:00	40	12.5	66.25	0.00023661	1001.67871	46	0.847826086956522	-5.33690909090909E-06
10_1	2001-03-21 02:00:00	41	12.5	66.25	0.00022976	1001.31561	46	0.869565217391304	-7.359E-06
10_1	2001-03-21 03:00:00	42	13	66.25	0.00021206	1001.99561	46	0.891304347826087	-9.57863636363636E-06
10_1	2001-03-21 04:00:00	43	13	66	0.00019501	1001.91125	46	0.91304347826087	-1.10157692307693E-05
10_1	2001-03-21 05:00:00	44	13	66	0.0001872	1002.11438	46	0.934782608695652	-1.24529020979021E-05
10_1	2001-03-21 06:00:00	45	13.5	65.75	0.00017843	1002.65558	46	0.956521739130435	-1.3890034965035E-05
10_1	2001-03-21 07:00:00	46	13	65.75	0.00016637	1002.65308	46	0.978260869565217	-1.53271678321679E-05
10_1	2001-03-21 08:00:00	47	13.5	65.5	0.00015229	1003.1225	46	1	-1.67643006993008E-05
10_2	2001-03-20 00:00:00	1	12	75	0.00017732	1006.88995	10	0	5.1927062937063E-06
10_2	2001-03-20 01:00:00	2	11.5	75	0.00018735	1006.90747	10	0.1	5.09487412587413E-06
10_2	2001-03-20 02:00:00	3	11.5	75	0.0001936	1006.97937	10	0.2	4.99704195804196E-06
10_2	2001-03-20 03:00:00	4	10.5	74.75	0.0001999	1005.47308	10	0.3	4.89920979020978E-06
10_2	2001-03-20 04:00:00	5	10.5	74.75	0.00020202	1005.44122	10	0.4	4.80137762237761E-06
10_2	2001-03-20 05:00:00	6	10	74.5	0.00020302	1004.25873	10	0.5	4.70354545454546E-06
10_2	2001-03-20 06:00:00	7	9	74.25	0.00020965	1004.06	10	0.6	4.60571328671327E-06
10_2	2001-03-20 07:00:00	8	8.5	74	0.00021204	1003.53375	10	0.7	4.5078811188811E-06
10_2	2001-03-20 08:00:00	9	8.5	74	0.00021679	1003.53937	10	0.8	4.41004895104893E-06
10_2	2001-03-20 09:00:00	10	8	73.75	0.00022739	1003.74683	10	0.9	4.31221678321676E-06
10_2	2001-03-20 10:00:00	11	7	73.25	0.00022847	1003.50812	10	1	4.21438461538459E-06
12_1	2001-04-09 08:00:00	1	-7	74.25	0.00015438	1016.59436	16	0	5.94500233100233E-05
12_1	2001-04-09 09:00:00	2	-7.5	74.25	0.00020141	1017.44684	16	0.0625	5.19971095571096E-05
12_1	2001-04-09 10:00:00	3	-7.5	74.25	0.00031526	1015.91998	16	0.125	4.45441958041958E-05
12_1	2001-04-09 11:00:00	4	-8	74.25	0.00033312	1015.26123	16	0.1875	3.7091282051282E-05
12_1	2001-04-09 12:00:00	5	-8	74.25	0.00033828	1013.74622	16	0.25	2.96383682983683E-05
12_1	2001-04-09 13:00:00	6	-8	74.25	0.00034526	1012.25684	16	0.3125	2.21854545454545E-05
12_1	2001-04-09 14:00:00	7	-8	74	0.00037972	1011.20435	16	0.375	1.475E-05
12_1	2001-04-09 15:00:00	8	-8.5	74	0.00039717	1011.02557	16	0.4375	7.248E-06
12_1	2001-04-09 16:00:00	9	-8.5	73.75	0.00040846	1011.0531	16	0.5	4.22045454545454E-06
12_1	2001-04-09 17:00:00	10	-8.5	73.5	0.0004013	1011.25372	16	0.5625	-3.63727272727273E-07
12_1	2001-04-09 18:00:00	11	-8	73.5	0.00039272	1009.27063	16	0.625	-4.48745454545455E-06
12_1	2001-04-09 19:00:00	12	-8	73.25	0.00038458	1009.4187	16	0.6875	-7.70618181818182E-06
12_1	2001-04-09 20:00:00	13	-7.5	73	0.00037272	1009.40558	16	0.75	-1.01043636363636E-05
12_1	2001-04-09 21:00:00	14	-7	72.75	0.0003688	1009.68433	16	0.8125	-1.25025454545455E-05
12_1	2001-04-09 22:00:00	15	-6.5	72.5	0.00032383	1009.30933	16	0.875	-1.49007272727273E-05
12_1	2001-04-09 23:00:00	16	-6	72.25	0.00032591	1009.58997	16	0.9375	-1.72989090909091E-05
12_1	2001-04-10 00:00:00	17	-5	72	0.00033497	1009.57184	16	1	-1.96970909090909E-05
12_2	2001-04-10 00:00:00	1	0.5	72.75	0.00031169	1006.30933	22	0	1.32883613053614E-05
12_2	2001-04-10 01:00:00	2	0.5	72.75	0.00037853	1004.91309	22	0.045454545454546	9.72456177156181E-06
12_2	2001-04-10 02:00:00	3	0	72.5	0.00040134	1004.50751	22	0.090909090909091	6.16076223776226E-06
12_2	2001-04-10 03:00:00	4	-0.5	72.25	0.00039989	1003.87872	22	0.136363636363636	2.59696270396272E-06
12_2	2001-04-10 04:00:00	5	-0.5	71.75	0.00039176	1003.56	22	0.181818181818182	-9.66836829836826E-07
12_2	2001-04-10 05:00:00	6	-0.5	71.25	0.0003964	1003.92999	22	0.227272727272727	-4.53063636363636E-06
12_2	2001-04-10 06:00:00	7	0.5	71.25	0.00035791	1004.56183	22	0.272727272727273	-7.82718181818182E-06
12_2	2001-04-10 07:00:00	8	1.5	70.75	0.0003115	1005.26935	22	0.318181818181818	-7.66154545454545E-06
12_2	2001-04-10 08:00:00	9	3.5	70.25	0.00030693	1004.27686	22	0.363636363636364	-5.45545454545455E-06
12_2	2001-04-10 09:00:00	10	5.5	70.25	0.00033199	1003.41058	22	0.409090909090909	-2.73472727272727E-06
12_2	2001-04-10 10:00:00	11	6.5	70	0.00034802	1002.94873	22	0.454545454545455	-3.79909090909092E-07
12_2	2001-04-10 11:00:00	12	8	70	0.00034064	1002.35187	22	0.5	2.50863636363636E-06
12_2	2001-04-10 12:00:00	13	9	70	0.00034239	1002.49561	22	0.545454545454545	3.56454545454545E-06
12_2	2001-04-10 13:00:00	14	10.5	70	0.00035268	1002.03687	22	0.590909090909091	1.75E-06
12_2	2001-04-10 14:00:00	15	12	70	0.00035601	1001.45184	22	0.636363636363636	-1.64609090909091E-06
12_2	2001-04-10 15:00:00	16	13.5	70	0.00034894	1001.62433	22	0.681818181818182	-4.697E-06
12_2	2001-04-10 16:00:00	17	14.5	70	0.00034655	1001.61871	22	0.727272727272727	-7.66945454545455E-06
12_2	2001-04-10 17:00:00	18	16	70	0.00034245	1001.97998	22	0.772727272727273	-1.11820909090909E-05
12_2	2001-04-10 18:00:00	19	17.5	70.25	0.0003319	1001.07623	22	0.818181818181818	-1.53137226107226E-05
12_2	2001-04-10 19:00:00	20	19	70.5	0.00030667	1000.53247	22	0.863636363636364	-1.94453543123544E-05
12_2	2001-04-10 20:00:00	21	20.5	70.75	0.00028414	999.98438	22	0.909090909090909	-2.35769860139861E-05
12_2	2001-04-10 21:00:00	22	21.5	71	0.00025706	999.12311	22	0.954545454545454	-2.77086177156178E-05
12_2	2001-04-10 22:00:00	23	22.5	71.25	0.00023584	997.51373	22	1	-3.18402494172495E-05
13_1	2001-10-27 00:00:00	1	-10	74.5	0.00017528	1005.49561	85	0	2.49532657342658E-05
13_1	2001-10-27 01:00:00	2	-11	74.75	0.00020131	1006.2981	85	0.011764705882353	2.34891398601399E-05
13_1	2001-10-27 02:00:00	3	-11	74.75	0.00023448	1005.2312	85	0.023529411764706	2.2025013986014E-05
13_1	2001-10-27 03:00:00	4	-11.5	74.75	0.00025337	1004.90247	85	0.035294117647059	2.05608881118881E-05
13_1	2001-10-27 04:00:00	5	-11.5	74.75	0.0002704	1004.17499	85	0.047058823529412	1.90967622377622E-05
13_1	2001-10-27 05:00:00	6	-12	74.75	0.00028477	1003.51996	85	0.058823529411765	1.76326363636364E-05
13_1	2001-10-27 06:00:00	7	-12	74.75	0.00030007	1003.33807	85	0.070588235294118	1.49984545454545E-05
13_1	2001-10-27 07:00:00	8	-11.5	75	0.00031158	1004.49622	85	0.082352941176471	1.18493636363636E-05
13_1	2001-10-27 08:00:00	9	-11.5	75	0.00033206	1004.3031	85	0.094117647058824	1.0063E-05
13_1	2001-10-27 09:00:00	10	-11.5	75	0.0003457	1004.09497	85	0.105882352941176	8.13281818181818E-06
13_1	2001-10-27 10:00:00	11	-11	75	0.00035992	1002.58807	85	0.117647058823529	6.34563636363636E-06
13_1	2001-10-27 11:00:00	12	-11	75	0.0003455	1001.96997	85	0.129411764705882	5.28872727272727E-06
13_1	2001-10-27 12:00:00	13	-10	75.25	0.00033698	1001.85187	85	0.141176470588235	5.32772727272727E-06
13_1	2001-10-27 13:00:00	14	-9.5	75.25	0.00035429	1001.36932	85	0.152941176470588	6.16836363636364E-06
13_1	2001-10-27 14:00:00	15	-9.5	75.25	0.00035242	1000.84125	85	0.164705882352941	8.56609090909091E-06
13_1	2001-10-27 15:00:00	16	-9.5	75.25	0.00035494	1000.12183	85	0.176470588235294	1.13318181818182E-05
13_1	2001-10-27 16:00:00	17	-9	75.25	0.00037067	999.03937	85	0.188235294117647	1.44497272727273E-05
13_1	2001-10-27 17:00:00	18	-9	75.25	0.0003936	998.23938	85	0.2	1.65630909090909E-05
13_1	2001-10-27 18:00:00	19	-8.5	75.25	0.00041613	997.56683	85	0.211764705882353	1.58220909090909E-05
13_1	2001-10-27 19:00:00	20	-8	75.25	0.00044672	996.06372	85	0.223529411764706	1.33743636363636E-05
13_1	2001-10-27 20:00:00	21	-7.5	75.25	0.00046138	995.12561	85	0.235294117647059	1.04685454545455E-05
13_1	2001-10-27 21:00:00	22	-7	75.25	0.0004752	993.79688	85	0.247058823529412	6.61136363636364E-06
13_1	2001-10-27 22:00:00	23	-6.5	75.25	0.00049346	992.67249	85	0.258823529411765	3.25990909090909E-06
13_1	2001-10-27 23:00:00	24	-6	75.25	0.00047048	991.81311	85	0.270588235294118	1.01827272727273E-06
13_1	2001-10-28 00:00:00	25	-5.5	75.25	0.00043886	992.10498	85	0.282352941176471	-6.51545454545455E-07
13_1	2001-10-28 01:00:00	26	-1.5	75.5	0.00044794	992.01312	85	0.294117647058824	-4.58636363636365E-07
13_1	2001-10-28 02:00:00	27	0	75.5	0.00044309	991.50812	85	0.305882352941176	-3.24545454545455E-07
13_1	2001-10-28 03:00:00	28	1	75.75	0.00045297	991.51434	85	0.317647058823529	4.58909090909091E-07
13_1	2001-10-28 04:00:00	29	2	75.75	0.00046633	990.8006	85	0.329411764705882	3.07536363636364E-06
13_1	2001-10-28 05:00:00	30	3	75.75	0.00046642	990.25934	85	0.341176470588235	5.56827272727273E-06
13_1	2001-10-28 06:00:00	31	4.5	76	0.00048075	990.02686	85	0.352941176470588	5.65181818181818E-06
13_1	2001-10-28 07:00:00	32	5.5	76	0.00046867	989.29248	85	0.364705882352941	5.74109090909091E-06
13_1	2001-10-28 08:00:00	33	7	76.25	0.00046783	989.82434	85	0.376470588235294	4.015E-06
13_1	2001-10-28 09:00:00	34	8.5	76.25	0.00048477	988.63	85	0.388235294117647	2.38509090909091E-06
13_1	2001-10-28 10:00:00	35	10	76.25	0.00050789	987.04871	85	0.4	2.79336363636363E-06
13_1	2001-10-28 11:00:00	36	12	76.5	0.00050031	987.13123	85	0.411764705882353	4.20990909090909E-06
13_1	2001-10-28 12:00:00	37	13	76.5	0.00050183	985.85498	85	0.423529411764706	5.76590909090909E-06
13_1	2001-10-28 13:00:00	38	14	76.5	0.00047849	985.06183	85	0.435294117647059	7.63918181818182E-06
13_1	2001-10-28 14:00:00	39	17.5	76.75	0.00047583	986.07684	85	0.447058823529412	1.01583636363636E-05
13_1	2001-10-28 15:00:00	40	19.5	77	0.00050921	985.39624	85	0.458823529411765	1.41983636363636E-05
13_1	2001-10-28 16:00:00	41	20.5	77	0.00053986	982.48621	85	0.470588235294118	1.84872727272727E-05
13_1	2001-10-28 17:00:00	42	22	77	0.00054042	980.74432	85	0.482352941176471	2.30374545454546E-05
13_1	2001-10-28 18:00:00	43	24.5	77.25	0.00057383	979.77557	85	0.494117647058824	2.66993636363636E-05
13_1	2001-10-28 19:00:00	44	26.5	77.5	0.00061008	979.37433	85	0.505882352941176	2.62118181818182E-05
13_1	2001-10-28 20:00:00	45	28.5	77.5	0.00065166	977.02124	85	0.517647058823529	2.34571818181818E-05
13_1	2001-10-28 21:00:00	46	30.5	77.75	0.00066277	975.89746	85	0.529411764705882	2.11655454545455E-05
13_1	2001-10-28 22:00:00	47	32	77.75	0.00070859	972.05499	85	0.541176470588235	1.80648181818182E-05
13_1	2001-10-28 23:00:00	48	33.5	78	0.00072888	969.84875	85	0.552941176470588	1.23121818181818E-05
13_1	2001-10-29 00:00:00	49	35.5	78.25	0.00071101	967.55121	85	0.564705882352941	7.94281818181818E-06
13_1	2001-10-29 01:00:00	50	36.5	78.5	0.00071083	965.6131	85	0.576470588235294	5.062E-06
13_1	2001-10-29 02:00:00	51	37.5	78.5	0.00072796	963.25751	85	0.588235294117647	3.89736363636364E-06
13_1	2001-10-29 03:00:00	52	38	78.75	0.00071713	961.69562	85	0.6	2.93690909090909E-06
13_1	2001-10-29 04:00:00	53	38.5	78.75	0.00069357	960.69995	85	0.611764705882353	1.26118181818182E-06
13_1	2001-10-29 05:00:00	54	39.5	79	0.00071454	958.97125	85	0.623529411764706	-2.55527272727272E-06
13_1	2001-10-29 06:00:00	55	40	79	0.00073193	958.65808	85	0.635294117647059	-6.02490909090909E-06
13_1	2001-10-29 07:00:00	56	40.5	79	0.00074416	958.48871	85	0.647058823529412	-1.20550909090909E-05
13_1	2001-10-29 08:00:00	57	41	79	0.00075382	959.34558	85	0.658823529411765	-1.69756363636364E-05
13_1	2001-10-29 09:00:00	58	41.5	78.75	0.00070131	959.2337	85	0.670588235294118	-2.12159090909091E-05
13_1	2001-10-29 10:00:00	59	42.5	78.75	0.00062841	962.06561	85	0.682352941176471	-2.58762727272727E-05
13_1	2001-10-29 11:00:00	60	44	78.75	0.00063739	962.12311	85	0.694117647058823	-2.84065454545455E-05
13_1	2001-10-29 12:00:00	61	45.5	78.5	0.00056655	962.85248	85	0.705882352941176	-2.87044545454546E-05
13_1	2001-10-29 13:00:00	62	47	78.5	0.00054155	963.185	85	0.717647058823529	-2.65448181818182E-05
13_1	2001-10-29 14:00:00	63	48	78.5	0.00053223	963.34998	85	0.729411764705882	-2.13689090909091E-05
13_1	2001-10-29 15:00:00	64	49.5	78.5	0.00051428	963.85748	85	0.741176470588235	-1.65586363636364E-05
13_1	2001-10-29 16:00:00	65	51	78.5	0.00050012	963.91748	85	0.752941176470588	-1.41883636363636E-05
13_1	2001-10-29 17:00:00	66	52.5	78.5	0.00048548	964.38184	85	0.764705882352941	-1.10166363636364E-05
13_1	2001-10-29 18:00:00	67	54	78.25	0.00047558	965.05249	85	0.776470588235294	-1.03707272727273E-05
13_1	2001-10-29 19:00:00	68	55.5	78.25	0.00047663	965.49432	85	0.788235294117647	-1.04331818181818E-05
13_1	2001-10-29 20:00:00	69	57	78.25	0.00047616	965.63812	85	0.8	-1.02485454545455E-05
13_1	2001-10-29 21:00:00	70	58.5	78.25	0.00046493	965.80621	85	0.811764705882353	-1.08387272727273E-05
13_1	2001-10-29 22:00:00	71	61	78.5	0.00043909	965.37561	85	0.823529411764706	-1.18178181818182E-05
13_1	2001-10-29 23:00:00	72	62.5	78.5	0.00042887	965.71747	85	0.835294117647059	-1.27590909090909E-05
13_1	2001-10-30 00:00:00	73	64.5	78.5	0.00041575	966.14563	85	0.847058823529412	-1.34711818181818E-05
13_1	2001-10-30 01:00:00	74	66	78.5	0.00040721	966.61871	85	0.858823529411765	-1.34023636363636E-05
13_1	2001-10-30 02:00:00	75	68	78.5	0.0003867	966.685	85	0.870588235294118	-1.2464E-05
13_1	2001-10-30 03:00:00	76	70	78.75	0.00036962	966.78125	85	0.882352941176471	-1.11874545454545E-05
13_1	2001-10-30 04:00:00	77	71.5	78.75	0.00036192	967.15875	85	0.894117647058823	-1.05034545454545E-05
13_1	2001-10-30 05:00:00	78	73	78.75	0.00035413	967.44812	85	0.905882352941176	-8.86854545454545E-06
13_1	2001-10-30 06:00:00	79	74.5	78.75	0.00034576	967.76245	85	0.917647058823529	-6.65281818181818E-06
13_1	2001-10-30 07:00:00	80	77	79	0.00033928	967.27063	85	0.929411764705882	-6.38409090909091E-06
13_1	2001-10-30 08:00:00	81	78.5	79	0.00033282	967.685	85	0.941176470588235	-1.19644545454545E-05
13_1	2001-10-30 09:00:00	82	81	79.25	0.00032437	967.71808	85	0.952941176470588	-1.66518904428905E-05
13_1	2001-10-30 10:00:00	83	82.5	79.25	0.00033461	967.34937	85	0.964705882352941	-2.13393263403264E-05
13_1	2001-10-30 11:00:00	84	85	79.5	0.00034428	967.3775	85	0.976470588235294	-2.60267622377623E-05
13_1	2001-10-30 12:00:00	85	85	79.5	0.0002974	967.86688	85	0.988235294117647	-3.07141981351982E-05
13_1	2001-10-30 13:00:00	86	85	79.5	0.00017137	969.64624	85	1	-3.54016340326341E-05
14_1	2001-10-31 20:00:00	1	17	72	0.00015323	999.30621	19	0	1.63152843822844E-05
14_1	2001-10-31 21:00:00	2	17.5	72	0.00016281	998.81311	19	0.052631578947369	1.65142820512821E-05
14_1	2001-10-31 22:00:00	3	17	71.75	0.00020568	997.12933	19	0.105263157894737	1.67132797202797E-05
14_1	2001-10-31 23:00:00	4	17.5	71.75	0.00020498	996.6712	19	0.157894736842105	1.69122773892774E-05
14_1	2001-11-01 00:00:00	5	18	71.75	0.0002114	996.71124	19	0.210526315789474	1.71112750582751E-05
14_1	2001-11-01 01:00:00	6	19.5	71.75	0.00022547	996.09308	19	0.263157894736842	1.73102727272727E-05
14_1	2001-11-01 02:00:00	7	20	71.75	0.00025432	996.72937	19	0.31578947368421	1.60183636363636E-05
14_1	2001-11-01 03:00:00	8	18	71	0.00027541	997.39185	19	0.368421052631579	1.31930909090909E-05
14_1	2001-11-01 04:00:00	9	19.5	71.25	0.00030197	996.84625	19	0.421052631578947	1.01782727272727E-05
14_1	2001-11-01 05:00:00	10	20	71	0.00031673	996.75812	19	0.473684210526316	5.57154545454545E-06
14_1	2001-11-01 06:00:00	11	20	70.75	0.00031639	997.85248	19	0.526315789473684	-8.61818181818181E-07
14_1	2001-11-01 07:00:00	12	21	70.75	0.00031338	997.93182	19	0.578947368421053	-7.82336363636364E-06
14_1	2001-11-01 08:00:00	13	21	70.5	0.00030018	999.50562	19	0.631578947368421	-1.25963636363636E-05
14_1	2001-11-01 09:00:00	14	21.5	70.5	0.00027204	1000.7912	19	0.68421052631579	-1.56588181818182E-05
14_1	2001-11-01 10:00:00	15	22	70.25	0.00025113	1001.61371	19	0.736842105263158	-1.76515454545455E-05
14_1	2001-11-01 11:00:00	16	22.5	70	0.00021247	1003.05499	19	0.789473684210526	-1.7772034965035E-05
14_1	2001-11-01 12:00:00	17	23	69.75	0.00018418	1004.32123	19	0.842105263157895	-1.78925244755245E-05
14_1	2001-11-01 13:00:00	18	24	68.75	0.00018945	1004.36188	19	0.894736842105263	-1.8013013986014E-05
14_1	2001-11-01 14:00:00	19	24	68.5	0.0001888	1005.84808	19	0.947368421052632	-1.81335034965035E-05
14_1	2001-11-01 15:00:00	20	24.5	68	0.00016314	1006.25684	19	1	-1.8253993006993E-05
15_1	2001-11-03 07:00:00	1	9.5	74.5	0.00022492	973.46808	58	0	5.96270862470864E-06
15_1	2001-11-03 08:00:00	2	9	74.5	0.00023434	974.33313	58	0.016949152542373	4.56685780885782E-06
15_1	2001-11-03 09:00:00	3	9	74.5	0.00023834	975.24188	58	0.033898305084746	3.171006993007E-06
15_1	2001-11-03 10:00:00	4	8.5	74.5	0.00023839	975.6806	58	0.050847457627119	1.77515617715617E-06
15_1	2001-11-03 11:00:00	5	8.5	74.5	0.00023932	976.33875	58	0.067796610169492	3.79305361305353E-07
15_1	2001-11-03 12:00:00	6	5.5	74	0.00024119	976.85248	58	0.084745762711864	-1.01654545454546E-06
15_1	2001-11-03 13:00:00	7	4.5	73.75	0.00024109	977.46997	58	0.101694915254237	-2.22854545454546E-06
15_1	2001-11-03 14:00:00	8	4	73.5	0.00023077	978.73938	58	0.11864406779661	-3.05218181818182E-06
15_1	2001-11-03 15:00:00	9	5	73.75	0.00022873	979.95312	58	0.135593220338983	-3.807E-06
15_1	2001-11-03 16:00:00	10	4	73.5	0.00022306	981.25311	58	0.152542372881356	-4.59536363636364E-06
15_1	2001-11-03 17:00:00	11	4.5	73.5	0.00022004	982.04871	58	0.169491525423729	-5.282E-06
15_1	2001-11-03 18:00:00	12	5.5	73.75	0.00021547	983.60498	58	0.186440677966102	-5.70245454545454E-06
15_1	2001-11-03 19:00:00	13	5	73.5	0.00021082	984.1275	58	0.203389830508475	-5.44418181818182E-06
15_1	2001-11-03 20:00:00	14	4.5	73.25	0.00020283	985.1181	58	0.220338983050847	-5.20036363636364E-06
15_1	2001-11-03 21:00:00	15	4.5	73	0.00019493	985.29187	58	0.23728813559322	-4.725E-06
15_1	2001-11-03 22:00:00	16	4.5	73	0.00018736	986.63812	58	0.254237288135593	-4.05918181818182E-06
15_1	2001-11-03 23:00:00	17	4.5	72.75	0.00018058	986.95563	58	0.271186440677966	-3.25990909090909E-06
15_1	2001-11-04 00:00:00	18	3.5	72.25	0.00018351	987.55188	58	0.288135593220339	-2.07E-06
15_1	2001-11-04 01:00:00	19	3	72	0.00018406	988.81934	58	0.305084745762712	-6.70909090909092E-07
15_1	2001-11-04 02:00:00	20	2	71.5	0.00018226	989.85248	58	0.322033898305085	8.74727272727271E-07
15_1	2001-11-04 03:00:00	21	2	71.25	0.00018396	989.91498	58	0.338983050847458	2.38918181818182E-06
15_1	2001-11-04 04:00:00	22	1.5	70.75	0.0001827	990.35248	58	0.35593220338983	3.222E-06
15_1	2001-11-04 05:00:00	23	1.5	70.75	0.00018931	990.77124	58	0.372881355932203	2.35381818181818E-06
15_1	2001-11-04 06:00:00	24	1	70.5	0.00019426	992.13312	58	0.389830508474576	1.50518181818182E-06
15_1	2001-11-04 07:00:00	25	1	70.25	0.00020376	992.36688	58	0.406779661016949	1.26663636363636E-06
15_1	2001-11-04 08:00:00	26	0.5	70	0.00021274	993.6275	58	0.423728813559322	1.06736363636364E-06
15_1	2001-11-04 09:00:00	27	0	69.75	0.00021039	994.82123	58	0.440677966101695	6.58272727272729E-07
15_1	2001-11-04 10:00:00	28	-0.5	69.5	0.00018571	995.89813	58	0.457627118644068	-2.58272727272725E-07
15_1	2001-11-04 11:00:00	29	0	68.75	0.00018365	995.24683	58	0.474576271186441	-1.29536363636364E-06
15_1	2001-11-04 12:00:00	30	-0.5	68.75	0.00019644	996.15875	58	0.491525423728814	-2.12118181818182E-06
15_1	2001-11-04 13:00:00	31	-0.5	68.25	0.00020194	996.59625	58	0.508474576271186	-2.60936363636364E-06
15_1	2001-11-04 14:00:00	32	-1	68.25	0.00019922	997.82001	58	0.525423728813559	-2.47063636363636E-06
15_1	2001-11-04 15:00:00	33	-1	68	0.00019262	998.1806	58	0.542372881355932	-2.07636363636364E-06
15_1	2001-11-04 16:00:00	34	-0.5	67.5	0.00018402	997.40747	58	0.559322033898305	-2.42809090909091E-06
15_1	2001-11-04 17:00:00	35	-0.5	67.25	0.00018167	998.10498	58	0.576271186440678	-2.19909090909091E-06
15_1	2001-11-04 18:00:00	36	0	66.75	0.00017518	998.02313	58	0.593220338983051	-1.11054545454546E-06
15_1	2001-11-04 19:00:00	37	0	66.5	0.00017248	998.65436	58	0.610169491525424	-2.20272727272729E-07
15_1	2001-11-04 20:00:00	38	0.5	66	0.00017287	998.99872	58	0.627118644067797	2.06181818181817E-07
15_1	2001-11-04 21:00:00	39	0.5	65.75	0.00017857	999.49933	58	0.644067796610169	1.30363636363636E-06
15_1	2001-11-04 22:00:00	40	0.5	65.75	0.00019239	999.75122	58	0.661016949152542	1.533E-06
15_1	2001-11-04 23:00:00	41	0	65.75	0.0001977	1000.58875	58	0.677966101694915	1.71918181818182E-06
15_1	2001-11-05 00:00:00	42	0	65.75	0.00018699	1000.93683	58	0.694915254237288	1.62972727272727E-06
15_1	2001-11-05 01:00:00	43	0	65.75	0.00017706	1001.57495	58	0.711864406779661	1.27645454545455E-06
15_2	2001-11-05 01:00:00	1	5.5	65.75	0.00017443	996.33496	3	0	3.5555E-05
15_2	2001-11-05 02:00:00	2	4	65.75	0.00019912	997.97308	3	0.333333333333333	1.3825E-05
15_2	2001-11-05 03:00:00	3	4.5	65.5	0.00020208	997.55872	3	0.666666666666667	-2.61500000000001E-06
15_2	2001-11-05 04:00:00	4	5	65.25	0.00019389	997.58185	3	1	-1.3765E-05
15_1	2001-11-05 05:00:00	44	0.5	65.5	0.00019531	1002.41187	58	0.796610169491525	3.98636363636366E-07
15_1	2001-11-05 06:00:00	45	0.5	65.5	0.00018707	1002.84308	58	0.813559322033898	5.43636363636387E-08
15_1	2001-11-05 07:00:00	46	0	65.5	0.00018955	1003.59186	58	0.830508474576271	-1.26090909090907E-07
15_1	2001-11-05 08:00:00	47	-0.5	65.5	0.00019285	1004.63434	58	0.847457627118644	-4.29090909090902E-08
15_1	2001-11-05 09:00:00	48	-0.5	65.5	0.00019382	1004.92621	58	0.864406779661017	-5.98727272727273E-07
15_1	2001-11-05 10:00:00	49	-0.5	66	0.00018608	1005.4306	58	0.88135593220339	-1.84218181818182E-06
15_1	2001-11-05 11:00:00	50	0	66	0.00019362	1004.36688	58	0.898305084745762	-1.96336363636364E-06
15_1	2001-11-05 12:00:00	51	0	66	0.00018365	1004.20624	58	0.915254237288135	-2.20036363636364E-06
15_1	2001-11-05 13:00:00	52	0.5	66.25	0.00018133	1003.55438	58	0.932203389830508	-2.36376689976692E-06
15_1	2001-11-05 14:00:00	53	1	66.5	0.00017685	1002.75372	58	0.949152542372881	-2.52717016317018E-06
15_1	2001-11-05 15:00:00	54	1.5	66.75	0.00017161	1002.36188	58	0.966101694915254	-2.69057342657344E-06
15_1	2001-11-05 16:00:00	55	2	66.75	0.00017331	1001.85748	58	0.983050847457627	-2.85397668997671E-06
15_1	2001-11-05 17:00:00	56	2.5	66.75	0.00017625	1001.185	58	1	-3.01737995337997E-06
16_1	2001-11-09 12:00:00	1	27	74.25	0.00028516	992.24561	32	0	1.67145757575757E-05
16_1	2001-11-09 13:00:00	2	27.5	74.25	0.00030329	991.62061	32	0.03125	1.47366969696969E-05
16_1	2001-11-09 14:00:00	3	27.5	74.5	0.00032576	991.93811	32	0.0625	1.27588181818182E-05
16_1	2001-11-09 15:00:00	4	27.5	74.5	0.00033923	990.63434	32	0.09375	1.07809393939394E-05
16_1	2001-11-09 16:00:00	5	28	74.5	0.00033168	989.64813	32	0.125	8.8030606060606E-06
16_1	2001-11-09 17:00:00	6	28	74.75	0.00035198	989.15625	32	0.15625	6.82518181818182E-06
16_1	2001-11-09 18:00:00	7	28	75	0.00034039	989.3031	32	0.1875	4.70618181818182E-06
16_1	2001-11-09 19:00:00	8	28	75	0.0003516	987.78687	32	0.21875	2.82136363636363E-06
16_1	2001-11-09 20:00:00	9	29	75.25	0.00036739	988.1687	32	0.25	1.41736363636364E-06
16_1	2001-11-09 21:00:00	10	29.5	75.5	0.00037221	988.08746	32	0.28125	5.85363636363638E-07
16_1	2001-11-09 22:00:00	11	29	75.5	0.00034851	987.66309	32	0.3125	-1.02845454545454E-06
16_1	2001-11-09 23:00:00	12	29	75.75	0.00035463	987.9881	32	0.34375	-1.55163636363636E-06
16_1	2001-11-10 00:00:00	13	29.5	76	0.00035192	988.49872	32	0.375	-2.169E-06
16_1	2001-11-10 01:00:00	14	29	76	0.00034526	987.14813	32	0.40625	-2.44536363636363E-06
16_1	2001-11-10 02:00:00	15	29	76.25	0.00034558	987.33563	32	0.4375	-2.36490909090909E-06
16_1	2001-11-10 03:00:00	16	29	76.5	0.00033871	986.7431	32	0.46875	-1.634E-06
16_1	2001-11-10 04:00:00	17	28	76.5	0.00033975	986.59558	32	0.5	-1.91718181818182E-06
16_1	2001-11-10 05:00:00	18	28	76.75	0.00034914	985.14874	32	0.53125	-3.93518181818182E-06
16_1	2001-11-10 06:00:00	19	27	76.75	0.00034494	984.26495	32	0.5625	-6.27127272727273E-06
16_1	2001-11-10 07:00:00	20	26.5	77	0.00033251	984.14124	32	0.59375	-8.72054545454546E-06
16_1	2001-11-10 08:00:00	21	25.5	77	0.00033406	983.63373	32	0.625	-1.05947272727273E-05
16_1	2001-11-10 09:00:00	22	25	77.25	0.00033256	983.38623	32	0.65625	-1.23332727272727E-05
16_1	2001-11-10 10:00:00	23	23.5	77.25	0.00028386	983.48438	32	0.6875	-1.40579090909091E-05
16_1	2001-11-10 11:00:00	24	22.5	77.25	0.00026596	983.07434	32	0.71875	-1.4885E-05
16_1	2001-11-10 12:00:00	25	22	77.5	0.00025427	982.86932	32	0.75	-1.5212E-05
16_1	2001-11-10 13:00:00	26	20	77.5	0.00024834	982.9231	32	0.78125	-1.543E-05
16_1	2001-11-10 14:00:00	27	19.5	77.5	0.00024012	981.90247	32	0.8125	-1.45899090909091E-05
16_1	2001-11-10 15:00:00	28	19	77.5	0.00021946	981.08563	32	0.84375	-1.2973E-05
16_1	2001-11-10 16:00:00	29	19.5	77.75	0.00020388	981.83875	32	0.875	-1.31977785547786E-05
16_1	2001-11-10 17:00:00	30	19.5	77.75	0.00019087	981.7406	32	0.90625	-1.34225571095572E-05
16_1	2001-11-10 18:00:00	31	19.5	78	0.00017737	983.47058	32	0.9375	-1.36473356643357E-05
16_1	2001-11-10 19:00:00	32	19	77.75	0.00016776	982.21497	32	0.96875	-1.38721142191143E-05
16_1	2001-11-10 20:00:00	33	18.5	77.5	0.00015339	981.43933	32	1	-1.40968927738929E-05
17_1	2001-11-12 13:00:00	1	5.5	65.25	0.00018362	997.97626	8	0	3.27768160173161E-05
17_1	2001-11-12 14:00:00	2	6	64.75	0.00019392	998.34436	8	0.125	2.52074870129871E-05
17_1	2001-11-12 15:00:00	3	6.5	64.5	0.0001984	998.46185	8	0.25	1.7638158008658E-05
17_1	2001-11-12 16:00:00	4	9	63.75	0.00021997	997.14313	8	0.375	1.0068829004329E-05
17_1	2001-11-12 17:00:00	5	8.5	63.5	0.00024201	999.1806	8	0.5	2.4995E-06
17_1	2001-11-12 18:00:00	6	8	63.25	0.0002548	1001.58185	8	0.625	-5.06982900432901E-06
17_1	2001-11-12 19:00:00	7	7.5	63	0.00024432	1004.12	8	0.75	-1.2639158008658E-05
17_1	2001-11-12 20:00:00	8	7	62.75	0.00020854	1006.65125	8	0.875	-2.0208487012987E-05
17_1	2001-11-12 21:00:00	9	7	62.75	0.00017848	1007.41748	8	1	-2.77778160173161E-05
18_1	2001-12-30 23:00:00	1	36	73.5	0.00015405	1007.82184	35	0	1.27523846153846E-05
18_1	2001-12-31 00:00:00	2	36.5	73.75	0.00015378	1007.1756	35	0.028571428571429	1.29011258741259E-05
18_1	2001-12-31 01:00:00	3	37	73.5	0.00016464	1006.57996	35	0.057142857142857	1.30498671328671E-05
18_1	2001-12-31 02:00:00	4	37.5	73.5	0.00018469	1005.21936	35	0.085714285714286	1.31986083916084E-05
18_1	2001-12-31 03:00:00	5	38	73.5	0.00020809	1004.84308	35	0.114285714285714	1.33473496503496E-05
18_1	2001-12-31 04:00:00	6	38.5	73.5	0.00021557	1004.28247	35	0.142857142857143	1.34960909090909E-05
18_1	2001-12-31 05:00:00	7	38.5	73.5	0.00022319	1003.77435	35	0.171428571428571	1.37680909090909E-05
18_1	2001-12-31 06:00:00	8	39.5	73.75	0.00023908	1003.08997	35	0.2	1.27755454545455E-05
18_1	2001-12-31 07:00:00	9	39.5	73.75	0.00025537	1002.63812	35	0.228571428571429	1.06647272727273E-05
18_1	2001-12-31 08:00:00	10	40	74	0.00026523	1002.2356	35	0.257142857142857	8.62072727272727E-06
18_1	2001-12-31 09:00:00	11	40.5	74	0.00028259	1001.745	35	0.285714285714286	7.08136363636364E-06
18_1	2001-12-31 10:00:00	12	41	74.25	0.00029038	1001.48499	35	0.314285714285714	5.52890909090909E-06
18_1	2001-12-31 11:00:00	13	41.5	74.25	0.00029015	1001.21997	35	0.342857142857143	3.67363636363637E-06
18_1	2001-12-31 12:00:00	14	42	74.5	0.00027979	1000.22937	35	0.371428571428571	1.77527272727273E-06
18_1	2001-12-31 13:00:00	15	42	74.75	0.00028023	1000.28436	35	0.4	1.74454545454547E-07
18_1	2001-12-31 14:00:00	16	42.5	74.75	0.00028236	999.76562	35	0.428571428571429	-1.88727272727273E-06
18_1	2001-12-31 15:00:00	17	42.5	75	0.00028795	999.19812	35	0.457142857142857	-3.32363636363636E-06
18_1	2001-12-31 16:00:00	18	43	75.25	0.00028662	998.79437	35	0.485714285714286	-4.05436363636363E-06
18_1	2001-12-31 17:00:00	19	43.5	75.5	0.00027929	998.69995	35	0.514285714285714	-9.72090909090908E-07
18_1	2001-12-31 18:00:00	20	43.5	75.5	0.00027433	998.54187	35	0.542857142857143	2.40727272727271E-07
18_1	2001-12-31 19:00:00	21	44	75.75	0.00025615	998.68561	35	0.571428571428571	2.43363636363635E-07
18_1	2001-12-31 20:00:00	22	45	76	0.00024726	999.5481	35	0.6	2.15545454545454E-07
18_1	2001-12-31 21:00:00	23	46	76.25	0.00024637	1000.17371	35	0.628571428571429	8.19E-07
18_1	2001-12-31 22:00:00	24	46	76.25	0.00032173	998.34747	35	0.657142857142857	1.54190909090909E-06
18_1	2001-12-31 23:00:00	25	48	76.75	0.00029935	998.21375	35	0.685714285714286	1.85245454545454E-06
18_1	2002-01-01 00:00:00	26	49	77	0.00027611	997.80249	35	0.714285714285714	1.45554545454545E-06
18_1	2002-01-01 01:00:00	27	49.5	77	0.00027206	997.27185	35	0.742857142857143	-5.20727272727273E-07
18_1	2002-01-01 02:00:00	28	50.5	77.25	0.00027718	996.79498	35	0.771428571428571	-3.81590909090909E-06
18_1	2002-01-01 03:00:00	29	51.5	77.5	0.00027925	996.77557	35	0.8	-8.04145454545454E-06
18_1	2002-01-01 04:00:00	30	53	77.75	0.0002775	997.22058	35	0.828571428571429	-8.74463636363636E-06
18_1	2002-01-01 05:00:00	31	53.5	78	0.00026753	996.93872	35	0.857142857142857	-9.40845454545454E-06
18_1	2002-01-01 06:00:00	32	54.5	78.25	0.00025324	997.44501	35	0.885714285714286	-1.21508554778555E-05
18_1	2002-01-01 07:00:00	33	55	78.5	0.00023431	997.49121	35	0.914285714285714	-1.48932564102564E-05
18_1	2002-01-01 08:00:00	34	56	78.75	0.00021232	998.15057	35	0.942857142857143	-1.76356573426574E-05
18_1	2002-01-01 09:00:00	35	57	79.25	0.00019257	999.62683	35	0.971428571428572	-2.03780582750583E-05
18_1	2002-01-01 10:00:00	36	57.5	79.5	0.00019446	999.63562	35	1	-2.31204592074593E-05
18_2	2001-12-31 10:00:00	1	36.5	72.25	0.0002666	1001.255	19	0	1.32714405594406E-05
18_2	2001-12-31 11:00:00	2	37	72.25	0.00029332	1000.41748	19	0.052631578947369	1.06577342657343E-05
18_2	2001-12-31 12:00:00	3	37.5	72.25	0.00030356	999.86188	19	0.105263157894737	8.04402797202798E-06
18_2	2001-12-31 13:00:00	4	38	72.5	0.0003103	999.74188	19	0.157894736842105	5.43032167832168E-06
18_2	2001-12-31 14:00:00	5	38.5	72.5	0.00031267	999.06934	19	0.210526315789474	2.81661538461538E-06
18_2	2001-12-31 15:00:00	6	39	72.5	0.00030856	999.05811	19	0.263157894736842	2.02909090909087E-07
18_2	2001-12-31 16:00:00	7	39	72.5	0.00030407	998.8031	19	0.31578947368421	-2.03327272727273E-06
18_2	2001-12-31 17:00:00	8	39.5	72.5	0.00030376	998.7475	19	0.368421052631579	-2.80772727272727E-06
18_2	2001-12-31 18:00:00	9	39.5	72.5	0.00028977	998.68811	19	0.421052631578947	-3.28109090909091E-06
18_2	2001-12-31 19:00:00	10	40	73.25	0.0002902	998.78937	19	0.473684210526316	-3.91572727272727E-06
18_2	2001-12-31 20:00:00	11	40	73.5	0.00028617	998.56183	19	0.526315789473684	-4.53645454545454E-06
18_2	2001-12-31 21:00:00	12	40.5	73.5	0.00028468	998.47125	19	0.578947368421053	-4.94609090909091E-06
18_2	2001-12-31 22:00:00	13	40	73.25	0.00028839	996.67749	19	0.631578947368421	-5.14090909090909E-06
18_2	2001-12-31 23:00:00	14	40	73.5	0.00028174	996.20123	19	0.68421052631579	-5.19954545454545E-06
18_2	2002-01-01 00:00:00	15	40	73.5	0.00026574	995.69122	19	0.736842105263158	-6.08972727272727E-06
18_2	2002-01-01 01:00:00	16	40	73.5	0.00025429	995.47058	19	0.789473684210526	-6.72783916083918E-06
18_2	2002-01-01 02:00:00	17	39.5	74.25	0.00025219	995.40497	19	0.842105263157895	-7.36595104895107E-06
18_2	2002-01-01 03:00:00	18	39	74.25	0.00025103	995.1731	19	0.894736842105263	-8.00406293706296E-06
18_2	2002-01-01 04:00:00	19	39	74.25	0.00024379	995.16437	19	0.947368421052632	-8.64217482517485E-06
18_2	2002-01-01 05:00:00	20	38.5	74.25	0.00023029	995.37372	19	1	-9.28028671328674E-06
19_1	2002-01-11 11:00:00	1	-7	73.75	0.0001844	984.44312	14	0	4.46862703962703E-06
19_1	2002-01-11 12:00:00	2	-5.5	73.75	0.00018759	984.84686	14	0.071428571428572	3.99070163170162E-06
19_1	2002-01-11 13:00:00	3	-3	74	0.00019664	984.71185	14	0.142857142857143	3.51277622377622E-06
19_1	2002-01-11 14:00:00	4	-1.5	74.25	0.00018984	984.73749	14	0.214285714285714	3.03485081585081E-06
19_1	2002-01-11 15:00:00	5	0.5	74.25	0.00019987	984.28436	14	0.285714285714286	2.5569254079254E-06
19_1	2002-01-11 16:00:00	6	2.5	74.25	0.000208	984.27625	14	0.357142857142857	2.079E-06
19_1	2002-01-11 17:00:00	7	4	74.25	0.0002048	984.34247	14	0.428571428571429	1.22163636363636E-06
19_1	2002-01-11 18:00:00	8	5.5	74.25	0.00019932	984.92188	14	0.5	-2.05363636363636E-07
19_1	2002-01-11 19:00:00	9	7.5	74.25	0.00020167	984.95062	14	0.571428571428571	-1.54609090909091E-06
19_1	2002-01-11 20:00:00	10	9.5	74.25	0.00020458	984.9162	14	0.642857142857143	-4.01590909090909E-06
19_1	2002-01-11 21:00:00	11	11	74.25	0.00020875	984.92621	14	0.714285714285714	-6.210337995338E-06
19_1	2002-01-11 22:00:00	12	13	74.25	0.00019695	984.47247	14	0.785714285714286	-8.40476689976691E-06
19_1	2002-01-11 23:00:00	13	15	74	0.0001831	985.37061	14	0.857142857142857	-1.05991958041958E-05
19_1	2002-01-12 00:00:00	14	16.5	74	0.00017324	986.00751	14	0.928571428571428	-1.27936247086247E-05
19_1	2002-01-12 01:00:00	15	18	73.75	0.00015188	987.31561	14	1	-1.49880536130536E-05
19_2	2002-01-11 08:00:00	1	2	72.75	0.00015373	985.56061	54	0	7.30127972027969E-06
19_2	2002-01-11 09:00:00	2	3	73	0.00016259	985.245	54	0.018518518518519	7.32722377622375E-06
19_2	2002-01-11 10:00:00	3	4	73.25	0.00017027	985.10126	54	0.037037037037037	7.35316783216781E-06
19_2	2002-01-11 11:00:00	4	5.5	73.25	0.0001804	984.77185	54	0.055555555555556	7.37911188811187E-06
19_2	2002-01-11 12:00:00	5	6.5	73.5	0.00019636	984.33063	54	0.074074074074074	7.40505594405593E-06
19_2	2002-01-11 13:00:00	6	8	73.5	0.00020358	984.3656	54	0.092592592592593	7.431E-06
19_2	2002-01-11 14:00:00	7	9	73.75	0.00019994	983.87872	54	0.111111111111111	8.28745454545455E-06
19_2	2002-01-11 15:00:00	8	10.5	73.75	0.00019597	983.61932	54	0.12962962962963	9.02490909090909E-06
19_2	2002-01-11 16:00:00	9	12	74	0.00020497	982.94623	54	0.148148148148148	9.20236363636364E-06
19_2	2002-01-11 17:00:00	10	13.5	74	0.0002212	982.58496	54	0.166666666666667	1.01877272727273E-05
19_2	2002-01-11 18:00:00	11	15	74.25	0.00024256	982.16437	54	0.185185185185185	1.14513636363636E-05
19_2	2002-01-11 19:00:00	12	17	74.25	0.00026068	981.68933	54	0.203703703703704	1.2773E-05
19_2	2002-01-11 20:00:00	13	18.5	74.25	0.00026882	981.38873	54	0.222222222222222	1.34801818181818E-05
19_2	2002-01-11 21:00:00	14	20	74.25	0.00026853	981.1712	54	0.240740740740741	1.38265454545455E-05
19_2	2002-01-11 22:00:00	15	21.5	74.25	0.0002938	979.38251	54	0.259259259259259	1.36497272727273E-05
19_2	2002-01-11 23:00:00	16	23	74.25	0.00030345	979.03558	54	0.277777777777778	1.30501818181818E-05
19_2	2002-01-12 00:00:00	17	25	74.25	0.00031748	978.67999	54	0.296296296296296	1.30468181818182E-05
19_2	2002-01-12 01:00:00	18	27	74.25	0.00033111	978.45563	54	0.314814814814815	1.40968181818182E-05
19_2	2002-01-12 02:00:00	19	29	74.25	0.00035417	977.57562	54	0.333333333333333	1.48772727272727E-05
19_2	2002-01-12 03:00:00	20	31	74.25	0.0003635	976.52875	54	0.351851851851852	1.51409090909091E-05
19_2	2002-01-12 04:00:00	21	32.5	74.25	0.00036643	976.14996	54	0.37037037037037	1.45789090909091E-05
19_2	2002-01-12 05:00:00	22	34	74	0.00038296	975.99872	54	0.388888888888889	1.40916363636364E-05
19_2	2002-01-12 06:00:00	23	36	74	0.00041247	975.14624	54	0.407407407407407	1.2105E-05
19_2	2002-01-12 07:00:00	24	37.5	73.75	0.00042713	974.8056	54	0.425925925925926	9.419E-06
19_2	2002-01-12 08:00:00	25	39	73.75	0.00044777	974.5531	54	0.444444444444444	6.78881818181818E-06
19_2	2002-01-12 09:00:00	26	40.5	73.5	0.00043513	974.6181	54	0.462962962962963	3.93054545454546E-06
19_2	2002-01-12 10:00:00	27	41.5	73.5	0.00045346	974.06061	54	0.481481481481482	1.00536363636364E-06
19_2	2002-01-12 11:00:00	28	42.5	73.25	0.00043364	974.14062	54	0.5	-2.10327272727273E-06
19_2	2002-01-12 12:00:00	29	44	73	0.00042513	974.08936	54	0.518518518518518	-3.90436363636363E-06
19_2	2002-01-12 13:00:00	30	45.5	72.5	0.00041749	974.82062	54	0.537037037037037	-5.46645454545454E-06
19_2	2002-01-12 14:00:00	31	46.5	72.5	0.00041394	973.88251	54	0.555555555555556	-6.355E-06
19_2	2002-01-12 15:00:00	32	48	72.25	0.00041904	973.56934	54	0.574074074074074	-7.901E-06
19_2	2002-01-12 16:00:00	33	48.5	72	0.00040569	974.33685	54	0.592592592592593	-7.97781818181818E-06
19_2	2002-01-12 17:00:00	34	49	72	0.00040359	973.91687	54	0.611111111111111	-8.90345454545455E-06
19_2	2002-01-12 18:00:00	35	49.5	71.75	0.00038948	975.00061	54	0.62962962962963	-9.972E-06
19_2	2002-01-12 19:00:00	36	50	71.5	0.000372	975.63184	54	0.648148148148148	-1.05669090909091E-05
19_2	2002-01-12 20:00:00	37	50.5	71.25	0.00035755	977.15558	54	0.666666666666667	-1.06029090909091E-05
19_2	2002-01-12 21:00:00	38	51	71	0.00035236	978.20874	54	0.685185185185185	-9.27345454545455E-06
19_2	2002-01-12 22:00:00	39	52	70.75	0.00033725	979.4325	54	0.703703703703704	-7.30309090909091E-06
19_2	2002-01-12 23:00:00	40	52.5	70.5	0.00032504	980.39374	54	0.722222222222222	-4.92009090909091E-06
19_2	2002-01-13 00:00:00	41	52.5	70	0.00032461	980.2406	54	0.740740740740741	-3.58363636363637E-06
19_2	2002-01-13 01:00:00	42	53	69.75	0.00032259	981.73621	54	0.759259259259259	-3.40609090909091E-06
19_2	2002-01-13 02:00:00	43	53.5	69.25	0.00032824	981.84058	54	0.777777777777778	-3.703E-06
19_2	2002-01-13 03:00:00	44	54.5	69	0.0003402	981.8775	54	0.796296296296296	-3.67409090909091E-06
19_2	2002-01-13 04:00:00	45	55	68.5	0.0003387	983.3725	54	0.814814814814815	-4.67727272727273E-06
19_2	2002-01-13 05:00:00	46	55.5	68.25	0.00031963	983.96436	54	0.833333333333333	-5.78863636363636E-06
19_2	2002-01-13 06:00:00	47	56	67.75	0.00030114	986	54	0.851851851851852	-6.97436363636363E-06
19_2	2002-01-13 07:00:00	48	57	67.5	0.00029387	986.08435	54	0.87037037037037	-8.90918181818182E-06
19_2	2002-01-13 08:00:00	49	57	67	0.00029453	988.66937	54	0.888888888888889	-1.16338181818182E-05
19_2	2002-01-13 09:00:00	50	57.5	66.5	0.00027839	990.50751	54	0.907407407407407	-1.49457272727273E-05
19_2	2002-01-13 10:00:00	51	58	66.25	0.00027889	990.66058	54	0.925925925925926	-1.81650046620047E-05
19_2	2002-01-13 11:00:00	52	58.5	66	0.00026854	991.65436	54	0.944444444444444	-2.13842820512821E-05
19_2	2002-01-13 12:00:00	53	59	65.75	0.00024327	992.89062	54	0.962962962962963	-2.46035594405595E-05
19_2	2002-01-13 13:00:00	54	59.5	65.75	0.00020325	993.99432	54	0.981481481481482	-2.78228368298369E-05
19_2	2002-01-13 14:00:00	55	59	65	0.00015098	997.68872	54	1	-3.10421142191143E-05
20_1	2002-01-19 03:00:00	1	47.5	71.25	0.00015044	992.83246	5	0	1.43399999999999E-06
20_1	2002-01-19 04:00:00	2	47.5	70.75	0.00015061	993.25812	5	0.2	8.93999999999997E-07
20_1	2002-01-19 05:00:00	3	48.5	70.25	0.00015361	993.10999	5	0.4	3.54000000000046E-07
20_1	2002-01-19 06:00:00	4	48	70	0.00015093	994.03625	5	0.6	-4.99999999999538E-08
20_1	2002-01-19 07:00:00	5	49	69.5	0.00015205	994.41748	5	0.8	-6.24285714285713E-07
20_1	2002-01-19 08:00:00	6	49	69.25	0.00015114	995.50061	5	1	-1.19857142857143E-06
21_1	2002-01-22 04:00:00	1	33.5	74.5	0.0001551	990.77185	10	0	2.26045198135198E-05
21_1	2002-01-22 05:00:00	2	32.5	74.75	0.00017278	991.17621	10	0.1	1.82881794871795E-05
21_1	2002-01-22 06:00:00	3	31	74.75	0.00017999	990.31372	10	0.2	1.39718391608392E-05
21_1	2002-01-22 07:00:00	4	29.5	75	0.00018971	990.43933	10	0.3	9.65549883449884E-06
21_1	2002-01-22 08:00:00	5	28	75	0.00020778	990.20245	10	0.4	5.33915850815851E-06
21_1	2002-01-22 09:00:00	6	26.5	75	0.0002234	990.59747	10	0.5	1.02281818181818E-06
21_1	2002-01-22 10:00:00	7	25.5	75.25	0.00020836	991.72559	10	0.6	-3.29352214452215E-06
21_1	2002-01-22 11:00:00	8	24.5	75.25	0.00020314	992.69684	10	0.7	-7.60986247086248E-06
21_1	2002-01-22 12:00:00	9	22.5	75	0.00018961	993	10	0.8	-1.19262027972028E-05
21_1	2002-01-22 13:00:00	10	21	75	0.00017957	994.15625	10	0.9	-1.62425431235431E-05
21_1	2002-01-22 14:00:00	11	20	75	0.00016091	994.80499	10	1	-2.05588834498835E-05
21_2	2002-01-22 13:00:00	1	27.5	72.25	0.00026154	988.38873	25	0	3.01415617715622E-06
21_2	2002-01-22 14:00:00	2	27	72.5	0.00025283	987.59875	25	0.04	1.85599766899771E-06
21_2	2002-01-22 15:00:00	3	26	73	0.00025223	987.31433	25	0.08	6.97839160839186E-07
21_2	2002-01-22 16:00:00	4	25.5	73	0.00025293	986.70184	25	0.12	-4.60319347319333E-07
21_2	2002-01-22 17:00:00	5	24.5	73.25	0.00025458	986.72308	25	0.16	-1.61847785547785E-06
21_2	2002-01-22 18:00:00	6	24	73.25	0.00025304	985.96063	25	0.2	-2.77663636363636E-06
21_2	2002-01-22 19:00:00	7	23	73.5	0.00025458	986.34125	25	0.24	-4.29209090909091E-06
21_2	2002-01-22 20:00:00	8	22	73.5	0.00025069	985.96686	25	0.28	-5.50018181818182E-06
21_2	2002-01-22 21:00:00	9	21.5	73.5	0.00024781	985.46808	25	0.32	-5.50809090909091E-06
21_2	2002-01-22 22:00:00	10	21	73.25	0.00023272	984.72559	25	0.36	-4.85172727272727E-06
21_2	2002-01-22 23:00:00	11	20.5	73.25	0.00022009	984.82184	25	0.4	-3.92927272727273E-06
21_2	2002-01-23 00:00:00	12	19.5	73	0.00019942	984.02808	25	0.44	-3.32281818181818E-06
21_2	2002-01-23 01:00:00	13	18.5	73	0.00020421	983.84747	25	0.48	-2.80072727272727E-06
21_2	2002-01-23 02:00:00	14	18	73	0.00022161	983.72937	25	0.52	-2.292E-06
21_2	2002-01-23 03:00:00	15	17	72.75	0.00022926	983.0575	25	0.56	-1.53036363636364E-06
21_2	2002-01-23 04:00:00	16	16.5	72.75	0.0002284	983.03937	25	0.6	-1.03018181818182E-06
21_2	2002-01-23 05:00:00	17	16	72.5	0.00021806	982.19373	25	0.64	-1.19145454545455E-06
21_2	2002-01-23 06:00:00	18	15.5	72.5	0.00020736	982.2312	25	0.68	-2.82809090909091E-06
21_2	2002-01-23 07:00:00	19	14.5	72	0.00020229	981.60559	25	0.72	-4.47409090909091E-06
21_2	2002-01-23 08:00:00	20	14	72	0.00020163	981.65247	25	0.76	-5.23281818181818E-06
21_2	2002-01-23 09:00:00	21	13.5	71.5	0.00020475	981.45563	25	0.8	-5.55163636363636E-06
21_2	2002-01-23 10:00:00	22	13	71.25	0.00019976	981.93933	25	0.84	-5.8930815850816E-06
21_2	2002-01-23 11:00:00	23	12	71	0.00018804	982.04749	25	0.88	-6.23452680652683E-06
21_2	2002-01-23 12:00:00	24	12	70.75	0.00017981	981.89124	25	0.92	-6.57597202797206E-06
21_2	2002-01-23 13:00:00	25	12	70.75	0.00017357	981.9162	25	0.96	-6.91741724941728E-06
21_2	2002-01-23 14:00:00	26	12	70.5	0.00016446	981.90436	25	1	-7.25886247086251E-06
21_3	2002-01-20 12:00:00	1	33.5	75	0.00015619	997.65875	62	0	3.44229650349651E-05
21_3	2002-01-20 13:00:00	2	34	75.25	0.00018105	996.8631	62	0.016129032258065	3.53268811188811E-05
21_3	2002-01-20 14:00:00	3	34	75.25	0.00021336	995.39374	62	0.032258064516129	3.62307972027972E-05
21_3	2002-01-20 15:00:00	4	34	75.25	0.0002453	994.1806	62	0.048387096774194	3.71347132867133E-05
21_3	2002-01-20 16:00:00	5	34	75.25	0.00029437	992.68372	62	0.064516129032258	3.80386293706293E-05
21_3	2002-01-20 17:00:00	6	34	75.25	0.00033809	991.33313	62	0.080645161290323	3.89425454545455E-05
21_3	2002-01-20 18:00:00	7	33.5	75.25	0.00037668	990.39246	62	0.096774193548387	3.65539090909091E-05
21_3	2002-01-20 19:00:00	8	34	75.25	0.0004134	988.42749	62	0.112903225806452	3.0814E-05
21_3	2002-01-20 20:00:00	9	34	75.25	0.00045772	987.24683	62	0.129032258064516	2.2739E-05
21_3	2002-01-20 21:00:00	10	34	75.25	0.00048491	985.65308	62	0.145161290322581	1.39213636363636E-05
21_3	2002-01-20 22:00:00	11	34	75.25	0.00053952	985.02747	62	0.161290322580645	6.15236363636364E-06
21_3	2002-01-20 23:00:00	12	33.5	75	0.00050014	985.08875	62	0.17741935483871	-1.19654545454545E-06
21_3	2002-01-21 00:00:00	13	33.5	75	0.00046537	984.27063	62	0.193548387096774	-7.50418181818182E-06
21_3	2002-01-21 01:00:00	14	33.5	75	0.00043209	984.40125	62	0.209677419354839	-1.21052727272727E-05
21_3	2002-01-21 02:00:00	15	33.5	75	0.00042117	983.89124	62	0.225806451612903	-1.43782727272727E-05
21_3	2002-01-21 03:00:00	16	34	75	0.00042053	983.23309	62	0.241935483870968	-1.48166363636364E-05
21_3	2002-01-21 04:00:00	17	34	75	0.00040254	983.30499	62	0.258064516129032	-1.15263636363636E-05
21_3	2002-01-21 05:00:00	18	33.5	75	0.00039203	983.25183	62	0.274193548387097	-9.17909090909091E-06
21_3	2002-01-21 06:00:00	19	33.5	75	0.00038858	983.03436	62	0.290322580645161	-7.23963636363636E-06
21_3	2002-01-21 07:00:00	20	33	75	0.00038165	982.72748	62	0.306451612903226	-6.34454545454546E-06
21_3	2002-01-21 08:00:00	21	33	75	0.00037417	982.74683	62	0.32258064516129	-5.96790909090909E-06
21_3	2002-01-21 09:00:00	22	33	75	0.00036852	983.01373	62	0.338709677419355	-5.01718181818182E-06
21_3	2002-01-21 10:00:00	23	33	75	0.00036083	982.99683	62	0.354838709677419	-4.07481818181818E-06
21_3	2002-01-21 11:00:00	24	32.5	75.25	0.00036572	983.6131	62	0.370967741935484	-3.432E-06
21_3	2002-01-21 12:00:00	25	32.5	75.25	0.00036275	983.2525	62	0.387096774193548	-3.06954545454545E-06
21_3	2002-01-21 13:00:00	26	31.5	75.25	0.00035058	983.32495	62	0.403225806451613	-3.23163636363636E-06
21_3	2002-01-21 14:00:00	27	31	75.5	0.00034986	983.33685	62	0.419354838709677	-3.22036363636364E-06
21_3	2002-01-21 15:00:00	28	30.5	75.5	0.00035713	983.38251	62	0.435483870967742	-3.61109090909091E-06
21_3	2002-01-21 16:00:00	29	30	75.5	0.00035407	983.3125	62	0.451612903225806	-4.31254545454545E-06
21_3	2002-01-21 17:00:00	30	29	75.5	0.00034445	983.35248	62	0.467741935483871	-3.95063636363636E-06
21_3	2002-01-21 18:00:00	31	28	75.5	0.0003324	983.33746	62	0.483870967741936	-3.67163636363637E-06
21_3	2002-01-21 19:00:00	32	27	75.5	0.00033534	983.73749	62	0.5	-4.313E-06
21_3	2002-01-21 20:00:00	33	26	75.5	0.00032551	984.59058	62	0.516129032258065	-4.47236363636364E-06
21_3	2002-01-21 21:00:00	34	25.5	75.25	0.0003193	984.66437	62	0.532258064516129	-3.60490909090909E-06
21_3	2002-01-21 22:00:00	35	24.5	75.25	0.00032852	985.01685	62	0.548387096774194	-2.55454545454545E-06
21_3	2002-01-21 23:00:00	36	23.5	75	0.00032282	985.69812	62	0.564516129032258	-1.60754545454545E-06
21_3	2002-01-22 00:00:00	37	23	74.75	0.00030919	985.77496	62	0.580645161290323	-1.63309090909091E-06
21_3	2002-01-22 01:00:00	38	22	74.75	0.00031238	986.44312	62	0.596774193548387	-2.26918181818182E-06
21_3	2002-01-22 02:00:00	39	21.5	74.5	0.00031875	986.50934	62	0.612903225806452	-3.93E-06
21_3	2002-01-22 03:00:00	40	20.5	74.5	0.00031877	987.47308	62	0.629032258064516	-6.22418181818182E-06
21_3	2002-01-22 04:00:00	41	20	74.25	0.00032098	987.41437	62	0.645161290322581	-7.78763636363636E-06
21_3	2002-01-22 05:00:00	42	19.5	74	0.00030935	987.89374	62	0.661290322580645	-9.32163636363636E-06
21_3	2002-01-22 06:00:00	43	18.5	74	0.00028778	988.32123	62	0.67741935483871	-1.07385454545455E-05
21_3	2002-01-22 07:00:00	44	18	73.75	0.00026752	988.10687	62	0.693548387096774	-1.1437E-05
21_3	2002-01-22 08:00:00	45	18	73.5	0.00024944	987.65875	62	0.709677419354839	-1.14877272727273E-05
21_3	2002-01-22 09:00:00	46	17.5	73.25	0.00024048	987.8075	62	0.725806451612903	-1.08891818181818E-05
21_3	2002-01-22 10:00:00	47	17.5	73	0.00023036	987.90186	62	0.741935483870968	-9.83345454545455E-06
21_3	2002-01-22 11:00:00	48	17	72.75	0.0002308	988.03308	62	0.758064516129032	-8.57718181818182E-06
21_3	2002-01-22 12:00:00	49	16.5	72.75	0.0002271	987.815	62	0.774193548387097	-7.84618181818182E-06
21_3	2002-01-22 13:00:00	50	16	72.75	0.00021665	988.05371	62	0.790322580645161	-7.47409090909091E-06
21_3	2002-01-22 14:00:00	51	15.5	72.5	0.00021049	987.79248	62	0.806451612903226	-7.20318181818182E-06
21_3	2002-01-22 15:00:00	52	15.5	72.5	0.00019624	987.76184	62	0.82258064516129	-6.69990909090909E-06
21_3	2002-01-22 16:00:00	53	15.5	72.25	0.00018966	987.12311	62	0.838709677419355	-5.95763636363636E-06
21_3	2002-01-22 17:00:00	54	15	72	0.00018005	986.80438	62	0.854838709677419	-4.56381818181818E-06
21_3	2002-01-22 18:00:00	55	14.5	71.75	0.00017492	986.57062	62	0.870967741935484	-3.24145454545455E-06
21_3	2002-01-22 19:00:00	56	14	71.5	0.00017587	986.6712	62	0.887096774193548	-2.043E-06
21_3	2002-01-22 20:00:00	57	13.5	71.25	0.00017702	986.51813	62	0.903225806451613	-9.89272727272728E-07
21_3	2002-01-22 21:00:00	58	14	71.25	0.00018173	985.90686	62	0.919354838709677	-9.97363636363638E-07
21_3	2002-01-22 22:00:00	59	14.5	71.25	0.00018581	984.88184	62	0.935483870967742	-1.29062703962706E-06
21_3	2002-01-22 23:00:00	60	15	71.25	0.00017968	984.37933	62	0.951612903225806	-1.58389044289047E-06
21_3	2002-01-23 00:00:00	61	15	71	0.00018001	984.04309	62	0.967741935483871	-1.87715384615388E-06
21_3	2002-01-23 01:00:00	62	15	71	0.00017689	983.5462	62	0.983870967741936	-2.17041724941729E-06
21_3	2002-01-23 02:00:00	63	14.5	70.75	0.00016391	983.34558	62	1	-2.4636806526807E-06
22_1	2002-01-23 10:00:00	1	16.5	70	0.00017689	981.52686	13	0	-4.34857109557108E-06
22_1	2002-01-23 11:00:00	2	16.5	70.25	0.00017831	980.75873	13	0.076923076923077	-3.47763869463869E-06
22_1	2002-01-23 12:00:00	3	16.5	70.25	0.0001717	980.81622	13	0.153846153846154	-2.60670629370629E-06
22_1	2002-01-23 13:00:00	4	16.5	70.5	0.0001641	980.65125	13	0.230769230769231	-1.73577389277389E-06
22_1	2002-01-23 14:00:00	5	17	70.25	0.00016621	980.6731	13	0.307692307692308	-8.64841491841492E-07
22_1	2002-01-23 15:00:00	6	17	70.25	0.00016919	980.68121	13	0.384615384615385	6.09090909090998E-09
22_1	2002-01-23 16:00:00	7	17.5	70.25	0.00017102	981.08246	13	0.461538461538462	6.27545454545456E-07
22_1	2002-01-23 17:00:00	8	17.5	70.25	0.00017023	980.82312	13	0.538461538461538	7.20727272727273E-07
22_1	2002-01-23 18:00:00	9	17.5	70.25	0.00016898	980.9281	13	0.615384615384615	-1.17181818181818E-07
22_1	2002-01-23 19:00:00	10	17	70.25	0.00017405	980.83435	13	0.692307692307692	-1.29473426573428E-06
22_1	2002-01-23 20:00:00	11	17	70.25	0.00017865	981.02625	13	0.769230769230769	-2.47228671328673E-06
22_1	2002-01-23 21:00:00	12	17	70.25	0.00017927	981.22308	13	0.846153846153846	-3.64983916083918E-06
22_1	2002-01-23 22:00:00	13	17	70	0.00016642	982.62433	13	0.923076923076923	-4.82739160839164E-06
22_1	2002-01-23 23:00:00	14	17	70	0.00015149	982.52185	13	1	-6.00494405594409E-06
22_3	2002-01-23 04:00:00	1	7.5	66	0.00015321	985.00684	15	0	2.2365386946387E-05
22_3	2002-01-23 05:00:00	2	7.5	66	0.00016049	985.22498	15	0.066666666666667	1.89697459207459E-05
22_3	2002-01-23 06:00:00	3	7.5	65.75	0.000167	984.90625	15	0.133333333333333	1.55741048951049E-05
22_3	2002-01-23 07:00:00	4	7.5	65.75	0.00018757	985.26685	15	0.2	1.21784638694639E-05
22_3	2002-01-23 08:00:00	5	7.5	65.5	0.00019486	985.67749	15	0.266666666666667	8.78282284382284E-06
22_3	2002-01-23 09:00:00	6	8	65.5	0.00020943	985.62061	15	0.333333333333333	5.38718181818182E-06
22_3	2002-01-23 10:00:00	7	8	65.25	0.00023032	985.1106	15	0.4	2.12890909090909E-06
22_3	2002-01-23 11:00:00	8	8.5	65.25	0.00022487	985.42249	15	0.466666666666667	-7.53090909090909E-07
22_3	2002-01-23 12:00:00	9	8.5	65.25	0.00021174	985.88745	15	0.533333333333333	-3.07318181818182E-06
22_3	2002-01-23 13:00:00	10	9	65	0.00020208	985.87622	15	0.6	-4.95390909090909E-06
22_3	2002-01-23 14:00:00	11	9	65	0.0001896	986.19434	15	0.666666666666667	-6.99645454545455E-06
22_3	2002-01-23 15:00:00	12	9.5	64.75	0.0001707	986.6275	15	0.733333333333333	-7.33358741258744E-06
22_3	2002-01-23 16:00:00	13	10.5	64.5	0.00017374	987.0625	15	0.8	-7.67072027972032E-06
22_3	2002-01-23 17:00:00	14	11	64.5	0.00018094	988.0556	15	0.866666666666667	-8.00785314685319E-06
22_3	2002-01-23 18:00:00	15	11.5	64.25	0.00016871	989.03436	15	0.933333333333333	-8.34498601398607E-06
22_3	2002-01-23 19:00:00	16	11.5	64.25	0.00015263	989.48187	15	1	-8.68211888111894E-06
22_5	2002-01-23 18:00:00	1	17.5	74.25	0.00015051	984.88684	47	0	6.71993006993008E-07
22_5	2002-01-23 19:00:00	2	16.5	74.5	0.0001654	985.68811	47	0.021276595744681	1.89695804195804E-06
22_5	2002-01-23 20:00:00	3	15.5	74.5	0.00019482	986.21625	47	0.042553191489362	3.12192307692308E-06
22_5	2002-01-23 21:00:00	4	14.5	74.5	0.00018911	986.02063	47	0.063829787234043	4.34688811188811E-06
22_5	2002-01-23 22:00:00	5	13.5	74.25	0.00018698	985.53558	47	0.085106382978723	5.57185314685315E-06
22_5	2002-01-23 23:00:00	6	12.5	74.25	0.00018809	985.46063	47	0.106382978723404	6.79681818181818E-06
22_5	2002-01-24 00:00:00	7	11.5	74.25	0.00018759	985.48688	47	0.127659574468085	8.22509090909091E-06
22_5	2002-01-24 01:00:00	8	10.5	74.25	0.00018579	985.92688	47	0.148936170212766	1.00057272727273E-05
22_5	2002-01-24 02:00:00	9	9.5	74	0.00019345	985.3537	47	0.170212765957447	1.29353636363636E-05
22_5	2002-01-24 03:00:00	10	9	74	0.00022511	985.0625	47	0.191489361702128	1.53242727272727E-05
22_5	2002-01-24 04:00:00	11	8	73.75	0.0002543	984.91058	47	0.212765957446808	1.71437272727273E-05
22_5	2002-01-24 05:00:00	12	7	73.75	0.00027504	984.98309	47	0.234042553191489	1.83962727272727E-05
22_5	2002-01-24 06:00:00	13	6	73.5	0.00028983	984.96686	47	0.25531914893617	1.75016363636364E-05
22_5	2002-01-24 07:00:00	14	5.5	73.5	0.00030469	984.74683	47	0.276595744680851	1.40183636363636E-05
22_5	2002-01-24 08:00:00	15	4.5	73.25	0.00032162	984.86371	47	0.297872340425532	9.89254545454546E-06
22_5	2002-01-24 09:00:00	16	4	73	0.00033815	984.82312	47	0.319148936170213	7.032E-06
22_5	2002-01-24 10:00:00	17	3	72.75	0.00035458	983.87561	47	0.340425531914894	5.41363636363637E-06
22_5	2002-01-24 11:00:00	18	2.5	72.5	0.00034124	984.01245	47	0.361702127659574	4.52654545454546E-06
22_5	2002-01-24 12:00:00	19	2	72	0.00031718	984.08496	47	0.382978723404255	4.14727272727273E-06
22_5	2002-01-24 13:00:00	20	1	71.75	0.00032013	984.62933	47	0.404255319148936	3.97409090909091E-06
22_5	2002-01-24 14:00:00	21	1	71.5	0.00033531	984.15057	47	0.425531914893617	4.35409090909091E-06
22_5	2002-01-24 15:00:00	22	0.5	71	0.00034965	984.01874	47	0.446808510638298	4.90581818181818E-06
22_5	2002-01-24 16:00:00	23	0	70.75	0.00035992	984.34125	47	0.468085106382979	6.30954545454546E-06
22_5	2002-01-24 17:00:00	24	0	70.5	0.00037032	984.05621	47	0.48936170212766	7.43490909090909E-06
22_5	2002-01-24 18:00:00	25	-0.5	70	0.00037312	984.62872	47	0.51063829787234	6.26718181818182E-06
22_5	2002-01-24 19:00:00	26	-0.5	69.75	0.00037866	984.89496	47	0.531914893617021	2.58663636363636E-06
22_5	2002-01-24 20:00:00	27	-0.5	69.25	0.00037401	985.26184	47	0.553191489361702	-2.37490909090909E-06
22_5	2002-01-24 21:00:00	28	-0.5	68.5	0.00038021	985.59875	47	0.574468085106383	-6.83972727272727E-06
22_5	2002-01-24 22:00:00	29	-0.5	68	0.00039522	985.76434	47	0.595744680851064	-9.93763636363636E-06
22_5	2002-01-24 23:00:00	30	0	67.5	0.00038444	985.61688	47	0.617021276595745	-1.09027272727273E-05
22_5	2002-01-25 00:00:00	31	1	67	0.00033907	985.8681	47	0.638297872340426	-1.07463636363636E-05
22_5	2002-01-25 01:00:00	32	1.5	66.5	0.00029646	986.55872	47	0.659574468085106	-9.67954545454546E-06
22_5	2002-01-25 02:00:00	33	2.5	66	0.00028241	986.41125	47	0.680851063829787	-8.532E-06
22_5	2002-01-25 03:00:00	34	3.5	65.75	0.00028671	986.27747	47	0.702127659574468	-6.99863636363636E-06
22_5	2002-01-25 04:00:00	35	4	65.5	0.00030651	986.55188	47	0.723404255319149	-4.20581818181818E-06
22_5	2002-01-25 05:00:00	36	4.5	65	0.00031506	987.43811	47	0.74468085106383	-1.66463636363637E-06
22_5	2002-01-25 06:00:00	37	5.5	64.75	0.00031683	987.03375	47	0.765957446808511	-8.97272727272723E-08
22_5	2002-01-25 07:00:00	38	6	64.75	0.00031182	987.50183	47	0.787234042553191	1.45454545454567E-08
22_5	2002-01-25 08:00:00	39	7	64.5	0.00030043	987.64313	47	0.808510638297872	-1.11545454545455E-06
22_5	2002-01-25 09:00:00	40	7.5	64.25	0.00029417	988.28625	47	0.829787234042553	-2.92245454545454E-06
22_5	2002-01-25 10:00:00	41	8.5	64	0.00028136	987.9881	47	0.851063829787234	-5.37945454545454E-06
22_5	2002-01-25 11:00:00	42	9	64	0.00029393	988.5506	47	0.872340425531915	-8.54190909090909E-06
22_5	2002-01-25 12:00:00	43	9.5	64	0.00030368	989.24188	47	0.893617021276596	-1.17312727272727E-05
22_5	2002-01-25 13:00:00	44	10	63.75	0.00029483	990.59186	47	0.914893617021277	-1.63474032634033E-05
22_5	2002-01-25 14:00:00	45	10.5	63.75	0.00027726	991.39124	47	0.936170212765957	-2.09635337995338E-05
22_5	2002-01-25 15:00:00	46	11	63.75	0.00023731	992.85748	47	0.957446808510638	-2.55796643356644E-05
22_5	2002-01-25 16:00:00	47	11.5	63.5	0.00019769	994.01562	47	0.978723404255319	-3.01957948717949E-05
22_5	2002-01-25 17:00:00	48	11.5	63.5	0.0001715	994.90375	47	1	-3.48119254079255E-05
22_6	2002-01-24 13:00:00	1	11.5	69.25	0.00015442	985.5506	4	0	8.07885714285714E-06
22_6	2002-01-24 14:00:00	2	12	69.5	0.00016262	985.56934	4	0.25	6.54742857142855E-06
22_6	2002-01-24 15:00:00	3	12	69.5	0.0001663	985.24371	4	0.5	5.01600000000006E-06
22_6	2002-01-24 16:00:00	4	12.5	69.75	0.00017298	985.29999	4	0.75	3.48457142857138E-06
22_6	2002-01-24 17:00:00	5	13	69.75	0.00017432	985.47247	4	1	1.95314285714279E-06
23_1	2002-01-24 18:00:00	1	11	70.5	0.00019663	985.46246	96	0	2.26510512820513E-05
23_1	2002-01-24 19:00:00	2	11	70.5	0.00022376	985.37122	96	0.010416666666667	2.13991864801865E-05
23_1	2002-01-24 20:00:00	3	10.5	70.5	0.00023739	985.75061	96	0.020833333333333	2.01473216783217E-05
23_1	2002-01-24 21:00:00	4	10.5	70.75	0.0002483	985.46875	96	0.03125	1.88954568764569E-05
23_1	2002-01-24 22:00:00	5	10.5	70.75	0.00026753	985.81812	96	0.041666666666667	1.76435920745921E-05
23_1	2002-01-24 23:00:00	6	10	70.75	0.0002801	985.79559	96	0.052083333333333	1.63917272727273E-05
23_1	2002-01-25 00:00:00	7	10	70.75	0.0003114	985.82812	96	0.0625	1.40413636363636E-05
23_1	2002-01-25 01:00:00	8	10	70.75	0.00033778	985.4212	96	0.072916666666667	1.17788181818182E-05
23_1	2002-01-25 02:00:00	9	10	70.5	0.000348	985.70123	96	0.083333333333333	8.77427272727273E-06
23_1	2002-01-25 03:00:00	10	10	70.5	0.00034928	985.36621	96	0.09375	5.33509090909091E-06
23_1	2002-01-25 04:00:00	11	10	70.5	0.0003459	985.23438	96	0.104166666666667	2.67872727272727E-06
23_1	2002-01-25 05:00:00	12	10.5	70.5	0.00034155	985.35559	96	0.114583333333333	-1.6572727272727E-07
23_1	2002-01-25 06:00:00	13	10.5	70.5	0.00033991	985.11499	96	0.125	-1.13836363636363E-06
23_1	2002-01-25 07:00:00	14	11	70.5	0.00033046	985.29059	96	0.135416666666667	-1.35609090909091E-06
23_1	2002-01-25 08:00:00	15	11	70.5	0.00032642	985.49432	96	0.145833333333333	-1.58427272727272E-06
23_1	2002-01-25 09:00:00	16	11.5	70.75	0.00033619	985.74371	96	0.15625	-1.57036363636363E-06
23_1	2002-01-25 10:00:00	17	12	71	0.0003307	984.89935	96	0.166666666666667	-1.76345454545455E-06
23_1	2002-01-25 11:00:00	18	12	71	0.00034444	985.41187	96	0.177083333333333	-2.50254545454546E-06
23_1	2002-01-25 12:00:00	19	12	71	0.000336	985.51813	96	0.1875	-3.37054545454545E-06
23_1	2002-01-25 13:00:00	20	12.5	71	0.00032315	985.36688	96	0.197916666666667	-4.39354545454545E-06
23_1	2002-01-25 14:00:00	21	13	71.25	0.00032197	985.80371	96	0.208333333333333	-4.92409090909091E-06
23_1	2002-01-25 15:00:00	22	13	71.25	0.00031601	985.54871	96	0.21875	-4.353E-06
23_1	2002-01-25 16:00:00	23	13.5	71.25	0.00030324	985.5556	96	0.229166666666667	-2.88436363636363E-06
23_1	2002-01-25 17:00:00	24	13.5	71.25	0.00029471	985.16248	96	0.239583333333333	1.11127272727273E-06
23_1	2002-01-25 18:00:00	25	14	71.25	0.0002936	985.21558	96	0.25	4.75881818181818E-06
23_1	2002-01-25 19:00:00	26	14	71.5	0.00030191	984.92688	96	0.260416666666667	8.07145454545455E-06
23_1	2002-01-25 20:00:00	27	14	71.75	0.00030952	985.42999	96	0.270833333333333	1.07405454545455E-05
23_1	2002-01-25 21:00:00	28	14	71.75	0.00033052	985.26562	96	0.28125	1.26855454545455E-05
23_1	2002-01-25 22:00:00	29	14.5	72	0.00036959	983.6087	96	0.291666666666667	1.40925454545455E-05
23_1	2002-01-25 23:00:00	30	14	72.25	0.00037709	983.53436	96	0.302083333333333	1.48156363636364E-05
23_1	2002-01-26 00:00:00	31	14	72.25	0.00039336	982.52625	96	0.3125	1.46683636363636E-05
23_1	2002-01-26 01:00:00	32	14	72.25	0.00039466	982.21625	96	0.322916666666667	1.39686363636364E-05
23_1	2002-01-26 02:00:00	33	14	72.25	0.00040042	981.4881	96	0.333333333333333	1.25203636363636E-05
23_1	2002-01-26 03:00:00	34	14	72.5	0.00042079	980.89874	96	0.34375	1.09703636363636E-05
23_1	2002-01-26 04:00:00	35	14	72.5	0.00043949	979.88373	96	0.354166666666667	1.04607272727273E-05
23_1	2002-01-26 05:00:00	36	14	72.5	0.00045063	979.56122	96	0.364583333333333	8.53372727272728E-06
23_1	2002-01-26 06:00:00	37	14	72.5	0.00045991	979.1037	96	0.375	7.29254545454546E-06
23_1	2002-01-26 07:00:00	38	14	72.5	0.00046591	979.04309	96	0.385416666666667	6.1509090909091E-06
23_1	2002-01-26 08:00:00	39	14	72.5	0.00046975	979.01184	96	0.395833333333333	4.98481818181818E-06
23_1	2002-01-26 09:00:00	40	14	72.75	0.0004736	978.9837	96	0.40625	4.49209090909091E-06
23_1	2002-01-26 10:00:00	41	14	72.75	0.00045422	979.83624	96	0.416666666666667	4.14990909090909E-06
23_1	2002-01-26 11:00:00	42	14	72.75	0.00046521	979.85126	96	0.427083333333333	3.53963636363636E-06
23_1	2002-01-26 12:00:00	43	13.5	73	0.00048021	980.22375	96	0.4375	2.28990909090909E-06
23_1	2002-01-26 13:00:00	44	14	73	0.00048987	980.51935	96	0.447916666666667	5.51545454545449E-07
23_1	2002-01-26 14:00:00	45	13.5	73.25	0.00049813	980.6875	96	0.458333333333333	-2.23363636363637E-06
23_1	2002-01-26 15:00:00	46	13.5	73.5	0.00049447	980.66687	96	0.46875	-5.05736363636364E-06
23_1	2002-01-26 16:00:00	47	13	73.75	0.0004862	980.99249	96	0.479166666666667	-8.94990909090909E-06
23_1	2002-01-26 17:00:00	48	12.5	74	0.00046811	981.5625	96	0.489583333333333	-9.40281818181818E-06
23_1	2002-01-26 18:00:00	49	12	74.25	0.0004518	982.17499	96	0.5	-8.94227272727272E-06
23_1	2002-01-26 19:00:00	50	11	74.75	0.00042134	982.64062	96	0.510416666666667	-7.862E-06
23_1	2002-01-26 20:00:00	51	10	75	0.00040619	983.31934	96	0.520833333333333	-5.20445454545454E-06
23_1	2002-01-26 21:00:00	52	8.5	75.25	0.00039245	984.19501	96	0.53125	-1.93745454545454E-06
23_1	2002-01-26 22:00:00	53	7	75.5	0.00044258	981.82996	96	0.541666666666667	5.66636363636366E-07
23_1	2002-01-26 23:00:00	54	5.5	75.5	0.00044015	983.19934	96	0.552083333333333	1.95145454545455E-06
23_1	2002-01-27 00:00:00	55	4.5	75.75	0.00043418	983.02936	96	0.5625	1.32163636363636E-06
23_1	2002-01-27 01:00:00	56	3	75.75	0.00044783	984.45563	96	0.572916666666667	-2.09263636363637E-06
23_1	2002-01-27 02:00:00	57	2	76	0.00045557	985.19995	96	0.583333333333333	-6.44054545454545E-06
23_1	2002-01-27 03:00:00	58	1	76	0.00044093	987.21185	96	0.59375	-1.12782727272727E-05
23_1	2002-01-27 04:00:00	59	-0.5	76.25	0.00042896	987.63434	96	0.604166666666667	-1.34918181818182E-05
23_1	2002-01-27 05:00:00	60	-1.5	76.5	0.00039638	989.315	96	0.614583333333333	-1.34745454545455E-05
23_1	2002-01-27 06:00:00	61	-3	76.25	0.00036059	991.3031	96	0.625	-1.36029090909091E-05
23_1	2002-01-27 07:00:00	62	-4.5	76.25	0.00034608	992.17621	96	0.635416666666667	-1.26401818181818E-05
23_1	2002-01-27 08:00:00	63	-5.5	76.25	0.00033977	993.51562	96	0.645833333333333	-1.04644545454545E-05
23_1	2002-01-27 09:00:00	64	-6.5	76.25	0.00032681	994.98438	96	0.65625	-8.39509090909091E-06
23_1	2002-01-27 10:00:00	65	-7.5	76.25	0.00035565	994.73938	96	0.666666666666667	-6.67018181818182E-06
23_1	2002-01-27 11:00:00	66	-8	76.25	0.00034271	996.2475	96	0.677083333333333	-6.37890909090909E-06
23_1	2002-01-27 12:00:00	67	-9	76.25	0.00033204	996.7912	96	0.6875	-7.48427272727273E-06
23_1	2002-01-27 13:00:00	68	-9.5	76.25	0.00032628	997.88812	96	0.697916666666667	-8.91518181818182E-06
23_1	2002-01-27 14:00:00	69	-9.5	76	0.00031565	999.01495	96	0.708333333333334	-1.00857272727273E-05
23_1	2002-01-27 15:00:00	70	-10	76	0.00029738	999.77185	96	0.71875	-1.14465454545455E-05
23_1	2002-01-27 16:00:00	71	-11	76.25	0.00027862	999.70624	96	0.729166666666667	-1.08973636363636E-05
23_1	2002-01-27 17:00:00	72	-12	76.5	0.00026729	1000.54437	96	0.739583333333333	-1.07373636363636E-05
23_1	2002-01-27 18:00:00	73	-12	76.5	0.00025888	1001.0675	96	0.75	-1.01883636363636E-05
23_1	2002-01-27 19:00:00	74	-12.5	76.5	0.00025474	1001.8006	96	0.760416666666667	-9.24927272727273E-06
23_1	2002-01-27 20:00:00	75	-13	76.5	0.0002491	1002.75873	96	0.770833333333333	-8.33218181818182E-06
23_1	2002-01-27 21:00:00	76	-13.5	76.75	0.00024097	1003.32562	96	0.78125	-7.78918181818182E-06
23_1	2002-01-27 22:00:00	77	-14	76.75	0.000225	1003.83875	96	0.791666666666667	-7.47827272727273E-06
23_1	2002-01-27 23:00:00	78	-14	76.75	0.00022282	1004.92371	96	0.802083333333333	-6.98127272727273E-06
23_1	2002-01-28 00:00:00	79	-14.5	76.75	0.00021647	1005.24561	96	0.8125	-6.39136363636363E-06
23_1	2002-01-28 01:00:00	80	-14	76.5	0.00020678	1005.68372	96	0.822916666666667	-5.39163636363636E-06
23_1	2002-01-28 02:00:00	81	-14	76.75	0.0001987	1005.3656	96	0.833333333333333	-4.15263636363636E-06
23_1	2002-01-28 03:00:00	82	-14	76.75	0.00019637	1005.65558	96	0.84375	-2.98209090909091E-06
23_1	2002-01-28 04:00:00	83	-14	76.75	0.00019761	1005.6825	96	0.854166666666667	-2.59172727272727E-06
23_1	2002-01-28 05:00:00	84	-14	76.75	0.00019581	1005.71686	96	0.864583333333333	-1.559E-06
23_1	2002-01-28 06:00:00	85	-14.5	77	0.00019718	1005.79938	96	0.875	-7.27727272727272E-07
23_1	2002-01-28 07:00:00	86	-14	77	0.0001977	1005.84808	96	0.885416666666667	-5.22727272727272E-07
23_1	2002-01-28 08:00:00	87	-13.5	77	0.00019567	1005.99121	96	0.895833333333333	-9.66272727272728E-07
23_1	2002-01-28 09:00:00	88	-13	77	0.00018861	1006.23438	96	0.90625	-1.82409090909091E-06
23_1	2002-01-28 10:00:00	89	-13	77.25	0.00019808	1006.04498	96	0.916666666666667	-2.56709090909091E-06
23_1	2002-01-28 11:00:00	90	-13	77.25	0.00019632	1006.11249	96	0.927083333333333	-3.09381818181818E-06
23_1	2002-01-28 12:00:00	91	-12.5	77.5	0.00019014	1006.12311	96	0.9375	-3.49890909090909E-06
23_1	2002-01-28 13:00:00	92	-12.5	77.5	0.00018224	1006.07562	96	0.947916666666667	-4.01209090909091E-06
23_1	2002-01-28 14:00:00	93	-11.5	77.75	0.00017263	1005.49121	96	0.958333333333334	-4.55533100233102E-06
23_1	2002-01-28 15:00:00	94	-11.5	77.75	0.00016892	1005.53998	96	0.96875	-5.09857109557111E-06
23_1	2002-01-28 16:00:00	95	-11	78	0.0001701	1005.19061	96	0.979166666666667	-5.6418111888112E-06
23_1	2002-01-28 17:00:00	96	-11	78	0.00016599	1004.97498	96	0.989583333333334	-6.1850512820513E-06
23_1	2002-01-28 18:00:00	97	-10.5	78.25	0.00015675	1004.73059	96	1	-6.72829137529139E-06
23_2	2002-01-25 10:00:00	1	6	66.25	0.00019844	989.45435	5	0	6.1025714285714E-06
23_2	2002-01-25 11:00:00	2	6	66	0.00019851	990.75684	5	0.2	1.02828571428568E-06
23_2	2002-01-25 12:00:00	3	6	65.75	0.00019956	991.93311	5	0.4	-4.04599999999995E-06
23_2	2002-01-25 13:00:00	4	6.5	65.5	0.00019485	992.25433	5	0.6	-9.58799999999995E-06
23_2	2002-01-25 14:00:00	5	6.5	65.25	0.00018004	993.33496	5	0.8	-1.69622857142857E-05
23_2	2002-01-25 15:00:00	6	7.5	65.75	0.00016033	993.41998	5	1	-2.43365714285714E-05
24_1	2002-02-18 17:00:00	1	32	71.25	0.00025187	977.72186	70	0	9.59788111888109E-06
24_1	2002-02-18 18:00:00	2	33.5	71.5	0.00025918	977.40558	70	0.014285714285714	7.48774125874123E-06
24_1	2002-02-18 19:00:00	3	35.5	71.5	0.00026674	976.88184	70	0.028571428571429	5.37760139860137E-06
24_1	2002-02-18 20:00:00	4	36.5	71.5	0.0002763	976.40875	70	0.042857142857143	3.26746153846152E-06
24_1	2002-02-18 21:00:00	5	37	71.5	0.00027908	975.89435	70	0.057142857142857	1.15732167832166E-06
24_1	2002-02-18 22:00:00	6	37	71.75	0.00026753	975.09558	70	0.071428571428572	-9.52818181818185E-07
24_1	2002-02-18 23:00:00	7	37	71.75	0.00026875	974.52936	70	0.085714285714286	-2.32581818181818E-06
24_1	2002-02-19 00:00:00	8	36.5	71.75	0.00026932	973.02936	70	0.1	-3.14009090909091E-06
24_1	2002-02-19 01:00:00	9	36.5	71.75	0.00026166	972.47058	70	0.114285714285714	-4.00418181818182E-06
24_1	2002-02-19 02:00:00	10	37.5	72	0.00025381	971.81873	70	0.128571428571429	-4.38218181818182E-06
24_1	2002-02-19 03:00:00	11	37.5	72	0.00024311	971.3056	70	0.142857142857143	-3.88309090909091E-06
24_1	2002-02-19 04:00:00	12	38	72.25	0.00024702	971.10938	70	0.157142857142857	-3.08163636363636E-06
24_1	2002-02-19 05:00:00	13	38	72.25	0.00024957	970.2475	70	0.171428571428571	-1.16636363636359E-07
24_1	2002-02-19 06:00:00	14	38.5	72.5	0.00023748	969.84747	70	0.185714285714286	2.72009090909091E-06
24_1	2002-02-19 07:00:00	15	38.5	72.5	0.00023085	969.44934	70	0.2	4.42290909090909E-06
24_1	2002-02-19 08:00:00	16	38	72.5	0.00023772	969.88745	70	0.214285714285714	5.36681818181818E-06
24_1	2002-02-19 09:00:00	17	38	72.75	0.00024996	970.57062	70	0.228571428571429	6.30509090909091E-06
24_1	2002-02-19 10:00:00	18	38	73	0.00029258	971.29309	70	0.242857142857143	7.661E-06
24_1	2002-02-19 11:00:00	19	38.5	73	0.00029384	970.32062	70	0.257142857142857	9.41263636363636E-06
24_1	2002-02-19 12:00:00	20	38.5	73	0.00028299	969.66998	70	0.271428571428571	1.03617272727273E-05
24_1	2002-02-19 13:00:00	21	38.5	73.25	0.00027998	968.89496	70	0.285714285714286	1.04366363636364E-05
24_1	2002-02-19 14:00:00	22	39	73.25	0.00029793	967.73187	70	0.3	9.63827272727272E-06
24_1	2002-02-19 15:00:00	23	39	73.5	0.00031339	967.44562	70	0.314285714285714	9.138E-06
24_1	2002-02-19 16:00:00	24	39	73.5	0.00033231	966.59375	70	0.328571428571429	1.06004545454545E-05
24_1	2002-02-19 17:00:00	25	39.5	73.5	0.00034571	966.01562	70	0.342857142857143	1.23576363636364E-05
24_1	2002-02-19 18:00:00	26	40	73.75	0.00035608	965.33374	70	0.357142857142857	1.19562727272727E-05
24_1	2002-02-19 19:00:00	27	40.5	73.75	0.00035367	964.9256	70	0.371428571428571	1.01863636363636E-05
24_1	2002-02-19 20:00:00	28	41	74	0.00036873	964.60248	70	0.385714285714286	7.88563636363637E-06
24_1	2002-02-19 21:00:00	29	41.5	74.25	0.00038452	964.45062	70	0.4	6.18863636363637E-06
24_1	2002-02-19 22:00:00	30	41	74.25	0.00040788	963.30499	70	0.414285714285714	5.79081818181818E-06
24_1	2002-02-19 23:00:00	31	41	74.25	0.00039622	963.92188	70	0.428571428571429	5.80927272727273E-06
24_1	2002-02-20 00:00:00	32	42	74.75	0.00039237	963.21625	70	0.442857142857143	4.33009090909091E-06
24_1	2002-02-20 01:00:00	33	42	75	0.00038163	963.56683	70	0.457142857142857	1.70572727272727E-06
24_1	2002-02-20 02:00:00	34	42	75.5	0.0003931	963.52063	70	0.471428571428571	-1.02290909090909E-06
24_1	2002-02-20 03:00:00	35	41.5	76	0.00041492	964.08313	70	0.485714285714286	-2.98336363636364E-06
24_1	2002-02-20 04:00:00	36	41	76	0.00042452	963.70435	70	0.5	-3.483E-06
24_1	2002-02-20 05:00:00	37	40.5	76.25	0.00039489	963.75934	70	0.514285714285714	-2.91436363636364E-06
24_1	2002-02-20 06:00:00	38	40	76.25	0.00038035	964.58624	70	0.528571428571429	-2.64318181818182E-06
24_1	2002-02-20 07:00:00	39	38.5	76.5	0.00036532	965.40247	70	0.542857142857143	-2.60090909090909E-06
24_1	2002-02-20 08:00:00	40	37	76.75	0.00036259	965.9906	70	0.557142857142857	-2.20609090909091E-06
24_1	2002-02-20 09:00:00	41	36.5	76.75	0.00036231	966.34125	70	0.571428571428571	-4.62909090909089E-07
24_1	2002-02-20 10:00:00	42	35.5	76.75	0.00039069	966.20374	70	0.585714285714286	2.66645454545455E-06
24_1	2002-02-20 11:00:00	43	34	76.75	0.00038766	967.31812	70	0.6	4.47227272727273E-06
24_1	2002-02-20 12:00:00	44	33	76.75	0.00039457	967.3125	70	0.614285714285714	5.31690909090909E-06
24_1	2002-02-20 13:00:00	45	32	76.75	0.00039115	967.5481	70	0.628571428571429	4.80090909090909E-06
24_1	2002-02-20 14:00:00	46	31	76.75	0.00039424	967.47247	70	0.642857142857143	3.25827272727272E-06
24_1	2002-02-20 15:00:00	47	31.5	77	0.00040908	967.06433	70	0.657142857142857	1.23672727272727E-06
24_1	2002-02-20 16:00:00	48	30.5	77	0.00041243	967.27936	70	0.671428571428571	4.24999999999998E-07
24_1	2002-02-20 17:00:00	49	29.5	77	0.00041224	967.64124	70	0.685714285714286	-1.26054545454546E-06
24_1	2002-02-20 18:00:00	50	29	77	0.00040672	968.57562	70	0.7	-3.31572727272727E-06
24_1	2002-02-20 19:00:00	51	28	77	0.00039569	969.19373	70	0.714285714285714	-6.11663636363636E-06
24_1	2002-02-20 20:00:00	52	27	77	0.00039211	970.19995	70	0.728571428571429	-8.67745454545454E-06
24_1	2002-02-20 21:00:00	53	25.5	77	0.00039063	971.40686	70	0.742857142857143	-1.00465454545455E-05
24_1	2002-02-20 22:00:00	54	25	77	0.00037503	973.49872	70	0.757142857142857	-1.08315454545455E-05
24_1	2002-02-20 23:00:00	55	24	76.75	0.00035608	974.39624	70	0.771428571428571	-1.10570909090909E-05
24_1	2002-02-21 00:00:00	56	23	76.75	0.00033608	975.73499	70	0.785714285714286	-1.14794545454545E-05
24_1	2002-02-21 01:00:00	57	21.5	76.75	0.00032664	976.85187	70	0.8	-1.12460909090909E-05
24_1	2002-02-21 02:00:00	58	20.5	76.5	0.00032153	977.63434	70	0.814285714285714	-1.14331818181818E-05
24_1	2002-02-21 03:00:00	59	19.5	76.5	0.00031285	979.13123	70	0.828571428571429	-1.15006363636364E-05
24_1	2002-02-21 04:00:00	60	18.5	76.25	0.00030547	979.68811	70	0.842857142857143	-1.23118181818182E-05
24_1	2002-02-21 05:00:00	61	17.5	76.25	0.00028641	981.08746	70	0.857142857142857	-1.34614545454545E-05
24_1	2002-02-21 06:00:00	62	16.5	76	0.00029001	981.14996	70	0.871428571428572	-1.49093636363636E-05
24_1	2002-02-21 07:00:00	63	15.5	76	0.00026392	982.47308	70	0.885714285714286	-1.59471818181818E-05
24_1	2002-02-21 08:00:00	64	15	75.75	0.00024269	982.65747	70	0.9	-1.59613636363636E-05
24_1	2002-02-21 09:00:00	65	13.5	75.5	0.00021546	982.76746	70	0.914285714285714	-1.53395454545455E-05
24_1	2002-02-21 10:00:00	66	12	75.5	0.00019884	983.79749	70	0.928571428571429	-1.45474545454545E-05
24_1	2002-02-21 11:00:00	67	11	75.25	0.00018483	984.1806	70	0.942857142857143	-1.27186433566434E-05
24_1	2002-02-21 12:00:00	68	10	75	0.00017493	984.38562	70	0.957142857142857	-1.08898321678322E-05
24_1	2002-02-21 13:00:00	69	8.5	75	0.00017324	985.04559	70	0.971428571428572	-9.06102097902099E-06
24_1	2002-02-21 14:00:00	70	8	74.75	0.00016799	984.9787	70	0.985714285714285	-7.2322097902098E-06
24_1	2002-02-21 15:00:00	71	7	74.5	0.00015162	984.8031	70	1	-5.40339860139862E-06
25_1	2002-02-20 01:00:00	1	33.5	72.75	0.00015843	972.31812	61	0	-3.94358741258741E-06
25_1	2002-02-20 02:00:00	2	34	72.5	0.00015446	972.65186	61	0.016393442622951	-7.18342657342659E-07
25_1	2002-02-20 03:00:00	3	33.5	72.5	0.0001599	973.02313	61	0.032786885245902	2.5069020979021E-06
25_1	2002-02-20 04:00:00	4	33.5	72.5	0.00016348	973.01062	61	0.049180327868853	5.73214685314685E-06
25_1	2002-02-20 05:00:00	5	33	72.5	0.0001662	973.34058	61	0.065573770491803	8.95739160839161E-06
25_1	2002-02-20 06:00:00	6	33.5	72.25	0.00017781	973.27997	61	0.081967213114754	1.21826363636364E-05
25_1	2002-02-20 07:00:00	7	33.5	72.25	0.0001942	973.40375	61	0.098360655737705	1.40653636363636E-05
25_1	2002-02-20 08:00:00	8	33.5	72.25	0.00020992	973.4906	61	0.114754098360656	1.54499090909091E-05
25_1	2002-02-20 09:00:00	9	34	72.25	0.00022311	973.53247	61	0.131147540983607	1.57005454545455E-05
25_1	2002-02-20 10:00:00	10	34.5	72.25	0.00026553	972.62872	61	0.147540983606557	1.47870909090909E-05
25_1	2002-02-20 11:00:00	11	34.5	72.25	0.00027549	972.78058	61	0.163934426229508	1.25903636363636E-05
25_1	2002-02-20 12:00:00	12	34.5	72.5	0.00028101	972.14496	61	0.180327868852459	9.83118181818182E-06
25_1	2002-02-20 13:00:00	13	35	72.5	0.00029933	972.18561	61	0.19672131147541	6.88081818181819E-06
25_1	2002-02-20 14:00:00	14	35.5	72.5	0.00029683	972.02374	61	0.213114754098361	4.33709090909091E-06
25_1	2002-02-20 15:00:00	15	36	72.75	0.00029431	972.03558	61	0.229508196721311	1.68909090909091E-06
25_1	2002-02-20 16:00:00	16	36.5	72.75	0.00028898	972.07184	61	0.245901639344262	7.3927272727273E-07
25_1	2002-02-20 17:00:00	17	36.5	73	0.00028723	971.9787	61	0.262295081967213	5.55818181818183E-07
25_1	2002-02-20 18:00:00	18	37	73.25	0.00028524	972.0531	61	0.278688524590164	5.25454545454547E-07
25_1	2002-02-20 19:00:00	19	37	73.5	0.00029353	972.08124	61	0.295081967213115	1.60445454545455E-06
25_1	2002-02-20 20:00:00	20	37	73.75	0.00029213	972.315	61	0.311475409836066	2.91290909090909E-06
25_1	2002-02-20 21:00:00	21	36.5	73.75	0.00029239	972.55933	61	0.327868852459016	3.97754545454545E-06
25_1	2002-02-20 22:00:00	22	36	74	0.00030267	972.54871	61	0.344262295081967	4.07336363636364E-06
25_1	2002-02-20 23:00:00	23	35.5	74.25	0.00030485	972.92371	61	0.360655737704918	3.19254545454545E-06
25_1	2002-02-21 00:00:00	24	35.5	74.25	0.00031204	972.59625	61	0.377049180327869	1.85181818181818E-06
25_1	2002-02-21 01:00:00	25	35	74.25	0.00032263	972.79309	61	0.39344262295082	7.82818181818184E-07
25_1	2002-02-21 02:00:00	26	35	74.25	0.00032545	972.51813	61	0.40983606557377	-6.15818181818181E-07
25_1	2002-02-21 03:00:00	27	35	74.25	0.00031676	972.63495	61	0.426229508196721	-2.07827272727273E-06
25_1	2002-02-21 04:00:00	28	35	74.25	0.00030293	972.69312	61	0.442622950819672	-3.33545454545454E-06
25_1	2002-02-21 05:00:00	29	35.5	74.25	0.00029834	972.76874	61	0.459016393442623	-5.21827272727273E-06
25_1	2002-02-21 06:00:00	30	36	74.25	0.00029699	972.82495	61	0.475409836065574	-6.19745454545454E-06
25_1	2002-02-21 07:00:00	31	36.5	74.25	0.00029211	973.66687	61	0.491803278688525	-6.50463636363636E-06
25_1	2002-02-21 08:00:00	32	36.5	74.5	0.00029039	973.87	61	0.508196721311475	-6.61445454545454E-06
25_1	2002-02-21 09:00:00	33	37	74.75	0.00028217	974.4212	61	0.524590163934426	-6.9E-06
25_1	2002-02-21 10:00:00	34	36.5	75	0.00026169	975.38495	61	0.540983606557377	-6.91927272727273E-06
25_1	2002-02-21 11:00:00	35	36.5	75.25	0.00026431	976.12433	61	0.557377049180328	-6.47590909090909E-06
25_1	2002-02-21 12:00:00	36	36	75.5	0.00025684	976.1806	61	0.573770491803279	-5.58154545454545E-06
25_1	2002-02-21 13:00:00	37	35.5	75.5	0.00024464	976.42688	61	0.590163934426229	-4.91754545454546E-06
25_1	2002-02-21 14:00:00	38	35	75.75	0.00023504	976.1875	61	0.60655737704918	-4.35127272727273E-06
25_1	2002-02-21 15:00:00	39	34.5	76	0.00024115	976.6806	61	0.622950819672131	-3.85954545454546E-06
25_1	2002-02-21 16:00:00	40	33.5	76	0.00024448	976.4187	61	0.639344262295082	-4.04590909090909E-06
25_1	2002-02-21 17:00:00	41	32.5	76.25	0.00024525	976.72937	61	0.655737704918033	-3.72009090909091E-06
25_1	2002-02-21 18:00:00	42	31.5	76.25	0.00023569	976.75	61	0.672131147540984	-2.99654545454546E-06
25_1	2002-02-21 19:00:00	43	30.5	76.25	0.00022432	976.57623	61	0.688524590163934	-2.52663636363636E-06
25_1	2002-02-21 20:00:00	44	29.5	76.25	0.00021933	976.5575	61	0.704918032786885	-2.63745454545454E-06
25_1	2002-02-21 21:00:00	45	29	76.25	0.00021642	976.82184	61	0.721311475409836	-2.67054545454545E-06
25_1	2002-02-21 22:00:00	46	27.5	76.25	0.00021549	977.20563	61	0.737704918032787	-2.62590909090909E-06
25_1	2002-02-21 23:00:00	47	26.5	76.25	0.00022344	977.29059	61	0.754098360655738	-1.99109090909091E-06
25_1	2002-02-22 00:00:00	48	26	76.25	0.00022582	977.5556	61	0.770491803278688	-1.44227272727273E-06
25_1	2002-02-22 01:00:00	49	25.5	76.5	0.0002208	977.86621	61	0.786885245901639	-1.29818181818182E-06
25_1	2002-02-22 02:00:00	50	24.5	76.5	0.00021233	977.84937	61	0.80327868852459	-1.48190909090909E-06
25_1	2002-02-22 03:00:00	51	23	76.25	0.00020428	977.97998	61	0.819672131147541	-2.15945454545454E-06
25_1	2002-02-22 04:00:00	52	22.5	76.25	0.0002083	977.89874	61	0.836065573770492	-3.20781818181818E-06
25_1	2002-02-22 05:00:00	53	21.5	76.25	0.00021049	978.04437	61	0.852459016393443	-3.47972727272727E-06
25_1	2002-02-22 06:00:00	54	20	76.25	0.00021019	978.57434	61	0.868852459016393	-3.43990909090909E-06
25_1	2002-02-22 07:00:00	55	19	76	0.00020614	978.76184	61	0.885245901639344	-3.70045454545455E-06
25_1	2002-02-22 08:00:00	56	17.5	76	0.00019613	979.56061	61	0.901639344262295	-4.40854545454546E-06
25_1	2002-02-22 09:00:00	57	16.5	75.75	0.00018503	979.55933	61	0.918032786885246	-5.61281818181818E-06
25_1	2002-02-22 10:00:00	58	15.5	75.5	0.00018648	979.58997	61	0.934426229508197	-6.36775990675993E-06
25_1	2002-02-22 11:00:00	59	14.5	75.5	0.00018309	979.81183	61	0.950819672131148	-7.12270163170166E-06
25_1	2002-02-22 12:00:00	60	13.5	75.25	0.00017396	978.71686	61	0.967213114754098	-7.87764335664339E-06
25_1	2002-02-22 13:00:00	61	12.5	75	0.00016491	977.78375	61	0.983606557377049	-8.63258508158512E-06
25_1	2002-02-22 14:00:00	62	11	74.75	0.00015417	977.33997	61	1	-9.38752680652686E-06
25_2	2002-02-21 21:00:00	1	27.5	72.25	0.00016871	979.36932	22	0	-3.2046177156177E-06
25_2	2002-02-21 22:00:00	2	29	72.5	0.00017524	979.30188	22	0.045454545454546	-1.41149417249416E-06
25_2	2002-02-21 23:00:00	3	30	72.5	0.00017615	979.13812	22	0.090909090909091	3.81629370629379E-07
25_2	2002-02-22 00:00:00	4	31	72.75	0.00017023	979.6781	22	0.136363636363636	2.17475291375292E-06
25_2	2002-02-22 01:00:00	5	32	73	0.00016755	979.25873	22	0.181818181818182	3.96787645687646E-06
25_2	2002-02-22 02:00:00	6	33	73.25	0.00017458	979.44562	22	0.227272727272727	5.761E-06
25_2	2002-02-22 03:00:00	7	34	73.75	0.00018254	979.4187	22	0.272727272727273	6.24336363636364E-06
25_2	2002-02-22 04:00:00	8	34.5	74	0.0001982	979.7337	22	0.318181818181818	6.952E-06
25_2	2002-02-22 05:00:00	9	35	74.5	0.00021067	979.69934	22	0.363636363636364	7.938E-06
25_2	2002-02-22 06:00:00	10	34.5	75	0.00022167	979.68182	22	0.409090909090909	8.37654545454546E-06
25_2	2002-02-22 07:00:00	11	34.5	75.25	0.00022341	979.99188	22	0.454545454545455	7.54272727272727E-06
25_2	2002-02-22 08:00:00	12	34	75.75	0.00022195	980.45813	22	0.5	6.72454545454545E-06
25_2	2002-02-22 09:00:00	13	32.5	76.25	0.00022974	980.56183	22	0.545454545454545	6.479E-06
25_2	2002-02-22 10:00:00	14	31	76.75	0.00024565	981.57495	22	0.590909090909091	6.741E-06
25_2	2002-02-22 11:00:00	15	29.5	77	0.00025461	981.92938	22	0.636363636363636	8.18472727272727E-06
25_2	2002-02-22 12:00:00	16	28	77.25	0.00024671	981.77936	22	0.681818181818182	8.80063636363636E-06
25_2	2002-02-22 13:00:00	17	24.5	77.25	0.00025445	981.57874	22	0.727272727272727	5.55318181818182E-06
25_2	2002-02-22 14:00:00	18	23.5	77.5	0.00027347	982.53497	22	0.772727272727273	-1.06872727272727E-06
25_2	2002-02-22 15:00:00	19	19.5	77.25	0.00028403	983.14124	22	0.818181818181818	-7.617351981352E-06
25_2	2002-02-22 16:00:00	20	19	77.5	0.00031223	984.97308	22	0.863636363636364	-1.41659766899767E-05
25_2	2002-02-22 17:00:00	21	19.5	78	0.00030113	988.89246	22	0.909090909090909	-2.07146013986014E-05
25_2	2002-02-22 18:00:00	22	19.5	78.25	0.00022994	991.63812	22	0.954545454545454	-2.72632261072262E-05
25_2	2002-02-22 19:00:00	23	20	78.5	0.00015876	994.46625	22	1	-3.38118508158509E-05
26_1	2002-02-23 06:00:00	1	6	70.75	0.00022583	962.94312	23	0	1.26994638694639E-05
26_1	2002-02-23 07:00:00	2	5.5	70.25	0.00023929	963.0506	23	0.043478260869565	1.23528438228438E-05
26_1	2002-02-23 08:00:00	3	5	69.5	0.00024924	963.37372	23	0.086956521739131	1.20062237762238E-05
26_1	2002-02-23 09:00:00	4	5	69	0.00027501	963.55249	23	0.130434782608696	1.16596037296037E-05
26_1	2002-02-23 10:00:00	5	5	68.75	0.0003132	963.55188	23	0.173913043478261	1.13129836829837E-05
26_1	2002-02-23 11:00:00	6	5.5	68.25	0.00029702	962.42749	23	0.217391304347826	1.09663636363636E-05
26_1	2002-02-23 12:00:00	7	5.5	67.75	0.0002935	963.27747	23	0.260869565217391	1.0975E-05
26_1	2002-02-23 13:00:00	8	6	67.25	0.00029292	962.90125	23	0.304347826086956	1.01879090909091E-05
26_1	2002-02-23 14:00:00	9	6.5	67	0.00029682	962.67999	23	0.347826086956522	8.85509090909091E-06
26_1	2002-02-23 15:00:00	10	7.5	66.75	0.0003315	961.78375	23	0.391304347826087	9.05418181818182E-06
26_1	2002-02-23 16:00:00	11	8.5	66.5	0.00036155	961.32684	23	0.434782608695652	1.05497272727273E-05
26_1	2002-02-23 17:00:00	12	9.5	66.25	0.00036437	961.29688	23	0.478260869565217	1.24112727272727E-05
26_1	2002-02-23 18:00:00	13	10	66.25	0.00035842	960.65997	23	0.521739130434783	1.05549090909091E-05
26_1	2002-02-23 19:00:00	14	10.5	66.25	0.0003583	960.45996	23	0.565217391304348	6.25027272727273E-06
26_1	2002-02-23 20:00:00	15	11	66.25	0.00038289	960.39996	23	0.608695652173913	-3.62727272727228E-08
26_1	2002-02-23 21:00:00	16	11.5	66.25	0.00038716	960.73621	23	0.652173913043478	-5.93136363636363E-06
26_1	2002-02-23 22:00:00	17	11.5	66.5	0.00042942	958.99121	23	0.695652173913043	-1.1137E-05
26_1	2002-02-23 23:00:00	18	12	66.25	0.00037833	959.44684	23	0.739130434782609	-1.69122727272727E-05
26_1	2002-02-24 00:00:00	19	12	66.25	0.00034213	960.43311	23	0.782608695652174	-2.31415454545455E-05
26_1	2002-02-24 01:00:00	20	12.5	66.25	0.00030369	961.56812	23	0.826086956521739	-3.03325710955711E-05
26_1	2002-02-24 02:00:00	21	12.5	66.25	0.00027206	962.86371	23	0.869565217391304	-3.75235967365968E-05
26_1	2002-02-24 03:00:00	22	13	66.25	0.00023928	964.33624	23	0.91304347826087	-4.47146223776224E-05
26_1	2002-02-24 04:00:00	23	13	66.25	0.00019891	965.47247	23	0.956521739130435	-5.19056480186481E-05
26_1	2002-02-24 05:00:00	24	13.5	66.25	0.00016297	966.94373	23	1	-5.90966736596737E-05
27_1	2002-03-01 10:00:00	1	8	69.25	0.00015998	991.84558	30	0	1.38265477855478E-05
27_1	2002-03-01 11:00:00	2	9	69.25	0.00019127	990.11249	30	0.033333333333333	1.58539836829837E-05
27_1	2002-03-01 12:00:00	3	9.5	69.25	0.00021337	989.42938	30	0.066666666666667	1.78814195804196E-05
27_1	2002-03-01 13:00:00	4	10	69.25	0.0002296	987.92871	30	0.1	1.99088554778555E-05
27_1	2002-03-01 14:00:00	5	10.5	69.25	0.00024603	987.01562	30	0.133333333333333	2.19362913752914E-05
27_1	2002-03-01 15:00:00	6	11	69.25	0.0002656	985.63312	30	0.166666666666667	2.39637272727273E-05
27_1	2002-03-01 16:00:00	7	11.5	69.25	0.00028615	984.71747	30	0.2	2.51875454545454E-05
27_1	2002-03-01 17:00:00	8	12	69.25	0.00031241	983.38812	30	0.233333333333333	2.86160909090909E-05
27_1	2002-03-01 18:00:00	9	12.5	69.25	0.00034038	982.24432	30	0.266666666666667	2.78022727272727E-05
27_1	2002-03-01 19:00:00	10	13	69.25	0.00037813	981.32062	30	0.3	2.52177272727273E-05
27_1	2002-03-01 20:00:00	11	13	69.25	0.00042034	980.84436	30	0.333333333333333	2.15510909090909E-05
27_1	2002-03-01 21:00:00	12	13.5	69.25	0.0004436	979.99683	30	0.366666666666667	1.58594545454545E-05
27_1	2002-03-01 22:00:00	13	14	69.25	0.00051128	978.40436	30	0.4	8.96309090909091E-06
27_1	2002-03-01 23:00:00	14	14.5	69.25	0.00045543	978.06122	30	0.433333333333333	2.24772727272727E-06
27_1	2002-03-02 00:00:00	15	14.5	69.25	0.00044541	978.3031	30	0.466666666666667	-3.90572727272728E-06
27_1	2002-03-02 01:00:00	16	15	69	0.00044505	978.59998	30	0.5	-8.86527272727273E-06
27_1	2002-03-02 02:00:00	17	15	69	0.00041682	978.80371	30	0.533333333333333	-1.24074545454545E-05
27_1	2002-03-02 03:00:00	18	15.5	69	0.0003959	979.64313	30	0.566666666666667	-1.51509090909091E-05
27_1	2002-03-02 04:00:00	19	15.5	69	0.00039032	980.40747	30	0.6	-1.389E-05
27_1	2002-03-02 05:00:00	20	15.5	68.75	0.0003847	981.71375	30	0.633333333333333	-1.31844545454545E-05
27_1	2002-03-02 06:00:00	21	15.5	68.75	0.00037453	982.52557	30	0.666666666666667	-1.2286E-05
27_1	2002-03-02 07:00:00	22	15.5	68.75	0.00035434	983.45996	30	0.7	-1.14912727272727E-05
27_1	2002-03-02 08:00:00	23	16	68.75	0.0003308	984.66998	30	0.733333333333333	-1.24816363636364E-05
27_1	2002-03-02 09:00:00	24	15.5	68.5	0.00031512	985.7431	30	0.766666666666667	-1.46476363636364E-05
27_1	2002-03-02 10:00:00	25	15.5	68.25	0.00033069	987.09436	30	0.8	-1.71291818181818E-05
27_1	2002-03-02 11:00:00	26	15.5	68.25	0.00032201	988.18372	30	0.833333333333333	-1.95127272727273E-05
27_1	2002-03-02 12:00:00	27	15.5	68	0.00029548	989.39685	30	0.866666666666667	-2.30027972027972E-05
27_1	2002-03-02 13:00:00	28	15.5	68	0.00026017	989.89685	30	0.9	-2.64928671328672E-05
27_1	2002-03-02 14:00:00	29	15.5	67.75	0.00022808	991.39185	30	0.933333333333333	-2.99829370629371E-05
27_1	2002-03-02 15:00:00	30	15.5	67.75	0.00019427	991.70245	30	0.966666666666667	-3.34730069930071E-05
27_1	2002-03-02 16:00:00	31	16	67.75	0.00016396	992.64435	30	1	-3.6963076923077E-05
28_1	2002-03-09 01:00:00	1	-0.5	71.5	0.00015462	993.15497	42	0	1.06964848484848E-05
28_1	2002-03-09 02:00:00	2	-0.5	71.25	0.00017004	991.81812	42	0.023809523809524	1.1337696969697E-05
28_1	2002-03-09 03:00:00	3	-1.5	71.25	0.00018226	991.64374	42	0.047619047619048	1.19789090909091E-05
28_1	2002-03-09 04:00:00	4	-1.5	71	0.00019344	989.87433	42	0.071428571428572	1.26201212121212E-05
28_1	2002-03-09 05:00:00	5	-2	71	0.0002132	989.07434	42	0.095238095238095	1.32613333333333E-05
28_1	2002-03-09 06:00:00	6	-2.5	70.75	0.0002225	988.59247	42	0.119047619047619	1.39025454545455E-05
28_1	2002-03-09 07:00:00	7	-2.5	70.5	0.00023373	987.3075	42	0.142857142857143	1.48348181818182E-05
28_1	2002-03-09 08:00:00	8	-3.5	70.25	0.00024029	987.63873	42	0.166666666666667	1.62691818181818E-05
28_1	2002-03-09 09:00:00	9	-3.5	70	0.00025922	986.95374	42	0.190476190476191	1.66541818181818E-05
28_1	2002-03-09 10:00:00	10	-4	69.75	0.00028092	986.44995	42	0.214285714285714	1.58741818181818E-05
28_1	2002-03-09 11:00:00	11	-4.5	69.5	0.00030275	985.88312	42	0.238095238095238	1.44438181818182E-05
28_1	2002-03-09 12:00:00	12	-4.5	69	0.00032556	985.94501	42	0.261904761904762	1.17037272727273E-05
28_1	2002-03-09 13:00:00	13	-5	68.75	0.00035229	986.09125	42	0.285714285714286	8.00409090909091E-06
28_1	2002-03-09 14:00:00	14	-4.5	68.25	0.00035099	985.86932	42	0.30952380952381	3.56509090909091E-06
28_1	2002-03-09 15:00:00	15	-4.5	68	0.00034569	985.89124	42	0.333333333333333	-9.99818181818182E-07
28_1	2002-03-09 16:00:00	16	-4	67.75	0.00033812	985.77747	42	0.357142857142857	-5.42981818181818E-06
28_1	2002-03-09 17:00:00	17	-3.5	67.5	0.00032313	985.60248	42	0.380952380952381	-7.72427272727273E-06
28_1	2002-03-09 18:00:00	18	-3.5	67.25	0.00030867	986.28998	42	0.404761904761905	-8.60745454545455E-06
28_1	2002-03-09 19:00:00	19	-3.5	67.25	0.00029952	987.11371	42	0.428571428571429	-8.21545454545455E-06
28_1	2002-03-09 20:00:00	20	-3	67	0.00028588	987.40436	42	0.452380952380952	-7.51572727272727E-06
28_1	2002-03-09 21:00:00	21	-3	67	0.00026814	988.29749	42	0.476190476190476	-6.31527272727273E-06
28_1	2002-03-09 22:00:00	22	-2.5	66.75	0.00028637	988.70184	42	0.5	-5.11790909090909E-06
28_1	2002-03-09 23:00:00	23	-2.5	66.75	0.00028677	989.44122	42	0.523809523809524	-4.28945454545454E-06
28_1	2002-03-10 00:00:00	24	-2.5	66.5	0.00027499	989.8562	42	0.547619047619048	-3.88581818181818E-06
28_1	2002-03-10 01:00:00	25	-2.5	66.5	0.00026786	989.84747	42	0.571428571428571	-3.48072727272727E-06
28_1	2002-03-10 02:00:00	26	-2.5	66.25	0.00026861	990.57812	42	0.595238095238095	-3.41418181818182E-06
28_1	2002-03-10 03:00:00	27	-2	66	0.00026221	990.81683	42	0.619047619047619	-4.41127272727272E-06
28_1	2002-03-10 04:00:00	28	-2	66	0.0002569	990.60748	42	0.642857142857143	-4.32554545454545E-06
28_1	2002-03-10 05:00:00	29	-1.5	65.75	0.00025166	991.23871	42	0.666666666666667	-3.38736363636364E-06
28_1	2002-03-10 06:00:00	30	-1.5	65.75	0.00025127	991.50562	42	0.69047619047619	-2.82509090909091E-06
28_1	2002-03-10 07:00:00	31	-1.5	65.5	0.00025054	991.98059	42	0.714285714285714	-2.89190909090909E-06
28_1	2002-03-10 08:00:00	32	-1.5	65.5	0.00024136	992.45746	42	0.738095238095238	-3.04363636363637E-06
28_1	2002-03-10 09:00:00	33	-1.5	65.25	0.00023795	992.84436	42	0.761904761904762	-3.46663636363636E-06
28_1	2002-03-10 10:00:00	34	-1.5	65.25	0.00024654	993.67499	42	0.785714285714286	-3.95718181818182E-06
28_1	2002-03-10 11:00:00	35	-1.5	65	0.00024436	993.61688	42	0.80952380952381	-4.98254545454545E-06
28_1	2002-03-10 12:00:00	36	-1.5	65	0.00023295	993.79187	42	0.833333333333333	-6.217E-06
28_1	2002-03-10 13:00:00	37	-1.5	64.75	0.0002232	993.60498	42	0.857142857142857	-7.07909090909091E-06
28_1	2002-03-10 14:00:00	38	-1.5	64.75	0.00021583	993.68372	42	0.880952380952381	-8.252E-06
28_1	2002-03-10 15:00:00	39	-2	64.75	0.00021144	993.36499	42	0.904761904761905	-9.34472727272729E-06
28_1	2002-03-10 16:00:00	40	-2	64.75	0.00019687	993.14062	42	0.928571428571428	-1.04374545454546E-05
28_1	2002-03-10 17:00:00	41	-2.5	64.75	0.00018178	992.28436	42	0.952380952380952	-1.15301818181818E-05
28_1	2002-03-10 18:00:00	42	-2.5	64.75	0.00017695	992.32434	42	0.976190476190476	-1.26229090909091E-05
28_1	2002-03-10 19:00:00	43	-3	64.75	0.00016641	992.505	42	1	-1.37156363636364E-05
29_1	2002-05-20 07:00:00	1	14.5	73.5	0.00015336	1009.69934	11	0	8.60114452214453E-06
29_1	2002-05-20 08:00:00	2	14.5	73.5	0.00015878	1009.8006	11	0.090909090909091	6.88671561771562E-06
29_1	2002-05-20 09:00:00	3	14.5	73.5	0.00015704	1010.18372	11	0.181818181818182	5.17228671328671E-06
29_1	2002-05-20 10:00:00	4	15	73.25	0.00019854	1009.44873	11	0.272727272727273	3.4578578088578E-06
29_1	2002-05-20 11:00:00	5	15.5	73.25	0.00018863	1009.72937	11	0.363636363636364	1.74342890442889E-06
29_1	2002-05-20 12:00:00	6	15.5	73	0.00017546	1009.52875	11	0.454545454545455	2.89999999999996E-08
29_1	2002-05-20 13:00:00	7	16	73	0.00016587	1010.52875	11	0.545454545454545	-1.45309090909091E-06
29_1	2002-05-20 14:00:00	8	19	73	0.00015728	1010.09186	11	0.636363636363636	-2.77952447552449E-06
29_1	2002-05-20 15:00:00	9	19.5	72.75	0.00016965	1010.02875	11	0.727272727272727	-4.10595804195806E-06
29_1	2002-05-20 16:00:00	10	19	72.75	0.00016659	1010.20935	11	0.818181818181818	-5.43239160839164E-06
29_1	2002-05-20 17:00:00	11	19.5	72.5	0.00016124	1010.14246	11	0.909090909090909	-6.75882517482521E-06
29_1	2002-05-20 18:00:00	12	19.5	72.5	0.00015385	1011.22809	11	1	-8.08525874125878E-06
31_1	2003-01-16 10:00:00	1	9	71	0.00026992	978.10437	20	0	1.31013356643356E-05
31_1	2003-01-16 11:00:00	2	9	71.25	0.0002643	978.49188	20	0.05	1.42857412587412E-05
31_1	2003-01-16 12:00:00	3	9	71.25	0.00025899	979.14563	20	0.1	1.54701468531468E-05
31_1	2003-01-16 13:00:00	4	8	71.75	0.00027274	979.1275	20	0.15	1.66545524475524E-05
31_1	2003-01-16 14:00:00	5	8	71.75	0.00029555	979.39435	20	0.2	1.78389580419581E-05
31_1	2003-01-16 15:00:00	6	7	72	0.00032333	979.07623	20	0.25	1.90233636363636E-05
31_1	2003-01-16 16:00:00	7	6.5	71.75	0.00036202	979.22437	20	0.3	1.82558181818182E-05
31_1	2003-01-16 17:00:00	8	6	71.75	0.00039814	978.62311	20	0.35	1.49829090909091E-05
31_1	2003-01-16 18:00:00	9	5.5	71.5	0.00041119	978.74872	20	0.4	8.83445454545455E-06
31_1	2003-01-16 19:00:00	10	5	71.25	0.00040935	978.93372	20	0.45	4.5109090909091E-07
31_1	2003-01-16 20:00:00	11	4.5	71.25	0.00041762	979.6062	20	0.5	-8.38636363636363E-06
31_1	2003-01-16 21:00:00	12	4	71	0.00039584	980.10999	20	0.55	-1.61979090909091E-05
31_1	2003-01-16 22:00:00	13	4	70.75	0.00037265	980.78625	20	0.6	-2.22339090909091E-05
31_1	2003-01-16 23:00:00	14	4	70.5	0.00033743	981.50812	20	0.65	-2.56189090909091E-05
31_1	2003-01-17 00:00:00	15	4.5	70.25	0.00028745	982.18433	20	0.7	-2.73999090909091E-05
31_1	2003-01-17 01:00:00	16	5.5	70	0.00025303	982.18121	20	0.75	-2.75886363636364E-05
31_1	2003-01-17 02:00:00	17	6	70	0.00023376	983.28125	20	0.8	-2.52261888111888E-05
31_1	2003-01-17 03:00:00	18	6	69.75	0.00020848	983.6275	20	0.85	-2.28637412587413E-05
31_1	2003-01-17 04:00:00	19	6	69.75	0.00019275	984.16058	20	0.9	-2.05012937062937E-05
31_1	2003-01-17 05:00:00	20	6	69.75	0.0001713	984.13495	20	0.95	-1.81388461538462E-05
31_1	2003-01-17 06:00:00	21	5.5	69.75	0.00016056	984.19122	20	1	-1.57763986013986E-05
32_1	2003-01-17 05:00:00	1	29	72.5	0.00015477	986.74121	19	0	3.72487995337996E-05
32_1	2003-01-17 06:00:00	2	29	72.5	0.00018274	986.77747	19	0.052631578947369	3.27629487179487E-05
32_1	2003-01-17 07:00:00	3	29	72.5	0.00019704	986.70123	19	0.105263157894737	2.82770979020979E-05
32_1	2003-01-17 08:00:00	4	29.5	72.5	0.00021009	986.36932	19	0.157894736842105	2.37912470862471E-05
32_1	2003-01-17 09:00:00	5	29.5	72.5	0.00023076	986.61621	19	0.210526315789474	1.93053962703963E-05
32_1	2003-01-17 10:00:00	6	30	72.5	0.00029252	984.47247	19	0.263157894736842	1.48195454545455E-05
32_1	2003-01-17 11:00:00	7	30	72.5	0.00032146	984.70813	19	0.31578947368421	1.06893636363636E-05
32_1	2003-01-17 12:00:00	8	30	72.5	0.00029829	985.10498	19	0.368421052631579	6.24236363636364E-06
32_1	2003-01-17 13:00:00	9	29.5	72.25	0.00028293	984.62122	19	0.421052631578947	7.6918181818182E-07
32_1	2003-01-17 14:00:00	10	29.5	72.25	0.00029126	985.3606	19	0.473684210526316	-5.09045454545454E-06
32_1	2003-01-17 15:00:00	11	29	72.25	0.00028903	986.09308	19	0.526315789473684	-1.05228181818182E-05
32_1	2003-01-17 16:00:00	12	29	72	0.00027359	986.12183	19	0.578947368421053	-1.31193636363636E-05
32_1	2003-01-17 17:00:00	13	28.5	72	0.00025682	986.82245	19	0.631578947368421	-1.39730909090909E-05
32_1	2003-01-17 18:00:00	14	28	72	0.0002319	987.53625	19	0.68421052631579	-1.45086363636364E-05
32_1	2003-01-17 19:00:00	15	30	71.5	0.00021471	987.64996	19	0.736842105263158	-1.50825454545455E-05
32_1	2003-01-17 20:00:00	16	29.5	71.5	0.00020023	988.14435	19	0.789473684210526	-1.42012867132867E-05
32_1	2003-01-17 21:00:00	17	29	71.5	0.0001824	988.76245	19	0.842105263157895	-1.3320027972028E-05
32_1	2003-01-17 22:00:00	18	30.5	71.25	0.00016399	988.92059	19	0.894736842105263	-1.24387692307693E-05
32_1	2003-01-17 23:00:00	19	30	71.25	0.0001673	988.99683	19	0.947368421052632	-1.15575104895105E-05
32_1	2003-01-18 00:00:00	20	30	71.25	0.00015869	989.14374	19	1	-1.06762517482518E-05
33_1	2003-01-22 05:00:00	1	6	75.75	0.00017133	993.60498	28	0	1.71800396270396E-05
33_1	2003-01-22 06:00:00	2	5.5	75.75	0.00019364	993.33313	28	0.035714285714286	1.62646317016317E-05
33_1	2003-01-22 07:00:00	3	4.5	75.75	0.00021378	993.28125	28	0.071428571428572	1.53492237762238E-05
33_1	2003-01-22 08:00:00	4	4	75.75	0.00023069	992.8656	28	0.107142857142857	1.44338158508158E-05
33_1	2003-01-22 09:00:00	5	3.5	75.75	0.00024296	992.72375	28	0.142857142857143	1.35184079254079E-05
33_1	2003-01-22 10:00:00	6	2.5	75.5	0.00026654	991.54559	28	0.178571428571429	1.2603E-05
33_1	2003-01-22 11:00:00	7	1.5	75.25	0.00027074	991.00995	28	0.214285714285714	1.24762727272727E-05
33_1	2003-01-22 12:00:00	8	0.5	75	0.00025682	990.76746	28	0.25	1.24734545454545E-05
33_1	2003-01-22 13:00:00	9	0	74.75	0.00026879	990.21063	28	0.285714285714286	1.22605454545455E-05
33_1	2003-01-22 14:00:00	10	-0.5	74.5	0.00029093	989.97687	28	0.321428571428571	1.22208181818182E-05
33_1	2003-01-22 15:00:00	11	-1	74.25	0.00032175	989.61371	28	0.357142857142857	1.18532727272727E-05
33_1	2003-01-22 16:00:00	12	-1.5	74	0.00033721	989.34125	28	0.392857142857143	1.14548181818182E-05
33_1	2003-01-22 17:00:00	13	-1.5	73.75	0.00034634	989.01935	28	0.428571428571429	9.775E-06
33_1	2003-01-22 18:00:00	14	-1	73.5	0.00034809	988.03876	28	0.464285714285714	5.81181818181818E-06
33_1	2003-01-22 19:00:00	15	-0.5	73	0.00035847	988.45496	28	0.5	8.31545454545456E-07
33_1	2003-01-22 20:00:00	16	0	72.75	0.00036209	988.29938	28	0.535714285714286	-3.90354545454545E-06
33_1	2003-01-22 21:00:00	17	1	72.5	0.00035694	988.64563	28	0.571428571428571	-7.59545454545455E-06
33_1	2003-01-22 22:00:00	18	2	72.25	0.00034179	988.29309	28	0.607142857142857	-1.0332E-05
33_1	2003-01-22 23:00:00	19	3	72.25	0.00032247	987.98871	28	0.642857142857143	-1.23702727272727E-05
33_1	2003-01-23 00:00:00	20	4.5	72	0.00029886	988.10437	28	0.678571428571429	-1.40630909090909E-05
33_1	2003-01-23 01:00:00	21	5.5	72	0.0002837	988.06372	28	0.714285714285714	-1.49303636363636E-05
33_1	2003-01-23 02:00:00	22	6.5	72	0.00026822	988.39624	28	0.75	-1.51026363636364E-05
33_1	2003-01-23 03:00:00	23	7.5	72.25	0.00025998	988.125	28	0.785714285714286	-1.4525E-05
33_1	2003-01-23 04:00:00	24	9	72.25	0.00024894	988.24432	28	0.821428571428572	-1.40469090909091E-05
33_1	2003-01-23 05:00:00	25	10	72.25	0.00023496	988.41998	28	0.857142857142857	-1.39411282051282E-05
33_1	2003-01-23 06:00:00	26	11.5	72.5	0.00021804	988.23749	28	0.892857142857143	-1.38353473193474E-05
33_1	2003-01-23 07:00:00	27	12.5	72.75	0.0002009	988.08496	28	0.928571428571428	-1.37295664335665E-05
33_1	2003-01-23 08:00:00	28	13.5	72.75	0.00019134	988.77313	28	0.964285714285714	-1.36237855477856E-05
33_1	2003-01-23 09:00:00	29	14.5	73	0.00017421	988.94434	28	1	-1.35180046620047E-05
34_1	2003-01-28 20:00:00	1	0	75.25	0.00016544	1009.92188	26	0	1.16471375291375E-05
34_1	2003-01-28 21:00:00	2	0	75	0.00017669	1009.99249	26	0.038461538461539	1.07194918414919E-05
34_1	2003-01-28 22:00:00	3	0.5	75	0.00019232	1009.25122	26	0.076923076923077	9.79184615384616E-06
34_1	2003-01-28 23:00:00	4	0.5	74.75	0.00020708	1008.99371	26	0.115384615384615	8.86420046620047E-06
34_1	2003-01-29 00:00:00	5	0.5	74.5	0.00020396	1008.81183	26	0.153846153846154	7.93655477855477E-06
34_1	2003-01-29 01:00:00	6	1	74.25	0.00020925	1007.87933	26	0.192307692307692	7.00890909090909E-06
34_1	2003-01-29 02:00:00	7	1	74.25	0.00021624	1007.36499	26	0.230769230769231	5.58054545454546E-06
34_1	2003-01-29 03:00:00	8	1	74	0.00022326	1007.1712	26	0.269230769230769	3.72663636363636E-06
34_1	2003-01-29 04:00:00	9	1	73.75	0.00023711	1006.70374	26	0.307692307692308	1.81854545454546E-06
34_1	2003-01-29 05:00:00	10	1	73.75	0.00023862	1006.81122	26	0.346153846153846	1.42463636363636E-06
34_1	2003-01-29 06:00:00	11	1	73.5	0.00023429	1006.48187	26	0.384615384615385	4.93363636363637E-07
34_1	2003-01-29 07:00:00	12	1.5	73.25	0.0002309	1006.1181	26	0.423076923076923	-5.17636363636364E-07
34_1	2003-01-29 08:00:00	13	1.5	73	0.00022113	1005.91437	26	0.461538461538462	-1.35727272727273E-06
34_1	2003-01-29 09:00:00	14	1.5	72.75	0.00021007	1006.18372	26	0.5	-1.94345454545455E-06
34_1	2003-01-29 10:00:00	15	1.5	72.5	0.00022922	1005.77374	26	0.538461538461538	-1.66972727272727E-06
34_1	2003-01-29 11:00:00	16	1.5	72.25	0.00022557	1005.58496	26	0.576923076923077	-7.22363636363638E-07
34_1	2003-01-29 12:00:00	17	1	72	0.00022179	1005.97937	26	0.615384615384615	2.75909090909089E-07
34_1	2003-01-29 13:00:00	18	1.5	71.5	0.00021968	1004.75995	26	0.653846153846154	1.06663636363636E-06
34_1	2003-01-29 14:00:00	19	1.5	71.25	0.00021752	1004.62122	26	0.692307692307692	1.04118181818182E-06
34_1	2003-01-29 15:00:00	20	1.5	70.75	0.00021867	1004.62872	26	0.730769230769231	1.56363636363636E-07
34_1	2003-01-29 16:00:00	21	1.5	70.5	0.00022799	1004.61188	26	0.769230769230769	3.86181818181818E-07
34_1	2003-01-29 17:00:00	22	1	70.25	0.00023218	1004.94183	26	0.807692307692308	1.12490909090909E-06
34_1	2003-01-29 18:00:00	23	1	70	0.00023126	1005.21936	26	0.846153846153846	1.14267132867131E-06
34_1	2003-01-29 19:00:00	24	1	69.75	0.0002251	1005.27246	26	0.884615384615385	1.16043356643354E-06
34_1	2003-01-29 20:00:00	25	1	69.5	0.00022026	1005.41809	26	0.923076923076923	1.17819580419578E-06
34_1	2003-01-29 21:00:00	26	1.5	68.75	0.00022384	1004.31061	26	0.961538461538462	1.19595804195801E-06
34_1	2003-01-29 22:00:00	27	2	68	0.00023834	1002.49622	26	1	1.21372027972025E-06
34_2	2003-01-29 23:00:00	1	0.5	68.75	0.00021688	1006.41058	10	0	1.71159673659673E-06
34_2	2003-01-30 00:00:00	2	1	68.25	0.00021624	1005.21875	10	0.1	7.54277389277381E-07
34_2	2003-01-30 01:00:00	3	1	67.75	0.00021303	1005.13495	10	0.2	-2.03041958041968E-07
34_2	2003-01-30 02:00:00	4	1	67.25	0.0002076	1005.07245	10	0.3	-1.16036130536132E-06
34_2	2003-01-30 03:00:00	5	1.5	66.5	0.00020616	1003.77063	10	0.4	-2.11768065268066E-06
34_2	2003-01-30 04:00:00	6	1.5	66.25	0.00020987	1003.99622	10	0.5	-3.075E-06
34_2	2003-01-30 05:00:00	7	1.5	66	0.00021127	1004.03186	10	0.6	-4.03231934731936E-06
34_2	2003-01-30 06:00:00	8	1.5	65.5	0.00020899	1004.49249	10	0.7	-4.98963869463871E-06
34_2	2003-01-30 07:00:00	9	1.5	65	0.00020031	1004.7406	10	0.8	-5.94695804195806E-06
34_2	2003-01-30 08:00:00	10	3	64	0.00018617	1002.52997	10	0.9	-6.90427738927741E-06
34_2	2003-01-30 09:00:00	11	3	63.25	0.00017934	1003.41687	10	1	-7.86159673659676E-06
34_3	2003-01-30 10:00:00	1	2.5	65	0.00021883	1003.20245	3	0	5.72499999999995E-06
34_3	2003-01-30 11:00:00	2	2.5	64.25	0.00021734	1002.87561	3	0.333333333333333	-8.705E-06
34_3	2003-01-30 12:00:00	3	2.5	63.75	0.00020142	1003.4906	3	0.666666666666667	-1.916E-05
34_3	2003-01-30 13:00:00	4	2	63.75	0.00017902	1005.44061	3	1	-2.56399999999999E-05
34_4	2003-01-30 11:00:00	1	3	62.5	0.00021161	1002.2431	21	0	7.78053613053618E-07
34_4	2003-01-30 12:00:00	2	3.5	62	0.00021193	1002.50433	21	0.047619047619048	-4.18298368298348E-08
34_4	2003-01-30 13:00:00	3	3	61.5	0.00021118	1003.51813	21	0.095238095238095	-8.61713286713287E-07
34_4	2003-01-30 14:00:00	4	3	61	0.00021479	1004.3631	21	0.142857142857143	-1.68159673659674E-06
34_4	2003-01-30 15:00:00	5	3	60.5	0.0002097	1004.71246	21	0.190476190476191	-2.50148018648019E-06
34_4	2003-01-30 16:00:00	6	3	60.25	0.00020329	1005.3056	21	0.238095238095238	-3.32136363636363E-06
34_4	2003-01-30 17:00:00	7	3.5	59.75	0.00020267	1005.01746	21	0.285714285714286	-3.16681818181818E-06
34_4	2003-01-30 18:00:00	8	3.5	59.25	0.00019894	1005.6181	21	0.333333333333333	-2.51263636363636E-06
34_4	2003-01-30 19:00:00	9	3.5	58.75	0.00019031	1006.20374	21	0.380952380952381	-1.957E-06
34_4	2003-01-30 20:00:00	10	3.5	58.25	0.00018244	1006.94434	21	0.428571428571429	-7.7390909090909E-07
34_4	2003-01-30 21:00:00	11	3.5	57.25	0.0001824	1008.49188	21	0.476190476190476	1.19881818181818E-06
34_4	2003-01-30 22:00:00	12	3.5	57	0.00019332	1009.10126	21	0.523809523809524	3.54545454545454E-06
34_4	2003-01-30 23:00:00	13	3.5	56.75	0.00020027	1009.24371	21	0.571428571428571	5.10936363636364E-06
34_4	2003-01-31 00:00:00	14	3.5	56.25	0.00019667	1010.28186	21	0.619047619047619	4.94690909090909E-06
34_4	2003-01-31 01:00:00	15	3.5	56	0.00020324	1011.09558	21	0.666666666666667	3.14809090909091E-06
34_4	2003-01-31 02:00:00	16	3.5	55.5	0.00022441	1011.40308	21	0.714285714285714	4.27181818181818E-07
34_4	2003-01-31 03:00:00	17	3.5	55.25	0.00024327	1011.82062	21	0.761904761904762	-2.73763636363636E-06
34_4	2003-01-31 04:00:00	18	3.5	54.75	0.00023479	1012.15997	21	0.80952380952381	-7.12700699300702E-06
34_4	2003-01-31 05:00:00	19	3.5	54.25	0.00020771	1012.63495	21	0.857142857142857	-1.15163776223777E-05
34_4	2003-01-31 06:00:00	20	3	54.25	0.00018382	1013.34747	21	0.904761904761905	-1.59057482517483E-05
34_4	2003-01-31 07:00:00	21	3	53.75	0.00017168	1014.14874	21	0.952380952380952	-2.02951188811189E-05
34_4	2003-01-31 08:00:00	22	3	53	0.00015981	1014.73187	21	1	-2.46844895104896E-05
35_1	2003-03-10 22:00:00	1	15	72.5	0.00015542	982.75433	7	0	1.41771428571429E-05
35_1	2003-03-10 23:00:00	2	15	72.25	0.00016761	983.26746	7	0.142857142857143	1.20228571428572E-05
35_1	2003-03-11 00:00:00	3	15.5	72.25	0.00017927	983.1687	7	0.285714285714286	9.86857142857143E-06
35_1	2003-03-11 01:00:00	4	16	72	0.00019002	983.45062	7	0.428571428571429	7.71428571428571E-06
35_1	2003-03-11 02:00:00	5	16.5	72	0.00019228	983.53497	7	0.571428571428571	5.50714285714286E-06
35_1	2003-03-11 03:00:00	6	17	71.75	0.00020009	983.73499	7	0.714285714285714	3.19761904761902E-06
35_1	2003-03-11 04:00:00	7	17.5	71.5	0.00020143	983.745	7	0.857142857142857	8.88095238095209E-07
35_1	2003-03-11 05:00:00	8	18	71.25	0.00020088	984.34186	7	1	-1.4214285714286E-06
35_2	2003-03-11 00:00:00	1	27	72	0.00018267	976.505	14	0	1.19860186480186E-05
35_2	2003-03-11 01:00:00	2	27.5	72	0.00021534	976.63812	14	0.071428571428572	1.33127785547786E-05
35_2	2003-03-11 02:00:00	3	27.5	72	0.00024076	976.45123	14	0.142857142857143	1.46395384615385E-05
35_2	2003-03-11 03:00:00	4	27.5	72	0.00026326	976.6875	14	0.214285714285714	1.59662983682984E-05
35_2	2003-03-11 04:00:00	5	27.5	72	0.00027534	976.85126	14	0.285714285714286	1.72930582750583E-05
35_2	2003-03-11 05:00:00	6	27.5	72	0.000281	977.25934	14	0.357142857142857	1.86198181818182E-05
35_2	2003-03-11 06:00:00	7	28	72	0.00028658	976.95123	14	0.428571428571429	1.95738181818182E-05
35_2	2003-03-11 07:00:00	8	29	72	0.00029624	976.72687	14	0.5	1.94520909090909E-05
35_2	2003-03-11 08:00:00	9	29	71.75	0.0003238	976.60437	14	0.571428571428571	1.81679090909091E-05
35_2	2003-03-11 09:00:00	10	30	71.75	0.00036063	976.23749	14	0.642857142857143	1.61285454545455E-05
35_2	2003-03-11 10:00:00	11	30.5	71.75	0.00041081	975.32062	14	0.714285714285714	1.32246293706293E-05
35_2	2003-03-11 11:00:00	12	31.5	71.75	0.00042907	975.52686	14	0.785714285714286	1.03207132867133E-05
35_2	2003-03-11 12:00:00	13	32.5	71.75	0.00041548	974.74121	14	0.857142857142857	7.41679720279716E-06
35_2	2003-03-11 13:00:00	14	34.5	72	0.00039943	974.26685	14	0.928571428571428	4.51288111888106E-06
35_2	2003-03-11 14:00:00	15	35.5	72	0.00038755	974.72998	14	1	1.60896503496497E-06
36_1	2003-03-22 22:00:00	1	-13	66.5	0.00015914	996.57996	58	0	4.793331002331E-06
36_1	2003-03-22 23:00:00	2	-12.5	66.75	0.00016978	995.92999	58	0.017857142857143	6.30104662004661E-06
36_1	2003-03-23 00:00:00	3	-12	67	0.00016158	995.61499	58	0.035714285714286	7.80876223776223E-06
36_1	2003-03-23 03:00:00	4	-10	68.5	0.000161	994.67621	58	0.053571428571429	9.31647785547785E-06
36_1	2003-03-23 04:00:00	5	-9.5	68.75	0.00018691	993.75873	58	0.071428571428572	1.08241934731935E-05
36_1	2003-03-23 05:00:00	6	-9	69.25	0.00021137	993.28058	58	0.089285714285714	1.23319090909091E-05
36_1	2003-03-23 06:00:00	7	-8.5	69.5	0.00022491	992.65375	58	0.107142857142857	1.36043636363636E-05
36_1	2003-03-23 07:00:00	8	-7.5	69.75	0.00023352	992.33124	58	0.125	1.44060909090909E-05
36_1	2003-03-23 08:00:00	9	-7	70	0.00023442	991.98749	58	0.142857142857143	1.42084545454545E-05
36_1	2003-03-23 09:00:00	10	-6	70.25	0.00024418	991.59625	58	0.160714285714286	1.29356363636364E-05
36_1	2003-03-23 10:00:00	11	-6	70.5	0.00029061	990.4931	58	0.178571428571429	1.12462727272727E-05
36_1	2003-03-23 11:00:00	12	-5.5	70.75	0.00029251	990.07562	58	0.196428571428571	9.51690909090909E-06
36_1	2003-03-23 12:00:00	13	-4.5	71	0.00029606	990.33313	58	0.214285714285714	7.55454545454546E-06
36_1	2003-03-23 13:00:00	14	-4	71	0.00030917	989.99249	58	0.232142857142857	5.185E-06
36_1	2003-03-23 14:00:00	15	-3.5	71.25	0.00031573	990.13	58	0.25	1.78581818181818E-06
36_1	2003-03-23 15:00:00	16	-2.5	71.25	0.00030642	990.14313	58	0.267857142857143	-2.10663636363637E-06
36_1	2003-03-23 16:00:00	17	-2	71.25	0.00030009	990.55872	58	0.285714285714286	-4.195E-06
36_1	2003-03-23 17:00:00	18	-1	71.25	0.00029646	990.875	58	0.303571428571429	-8.68236363636363E-06
36_1	2003-03-23 18:00:00	19	-0.5	71.25	0.00029148	991.53998	58	0.321428571428571	-1.10476363636364E-05
36_1	2003-03-23 19:00:00	20	1	71.25	0.00027934	991.53687	58	0.339285714285714	-1.16467272727273E-05
36_1	2003-03-23 20:00:00	21	2	71.25	0.00026576	991.9375	58	0.357142857142857	-1.11427272727273E-05
36_1	2003-03-23 21:00:00	22	3	71.25	0.00025405	992.37811	58	0.375	-9.732E-06
36_1	2003-03-23 22:00:00	23	8.5	72.25	0.00019168	992.46808	58	0.392857142857143	-8.20609090909091E-06
36_1	2003-03-23 23:00:00	24	9	72.25	0.00021394	992.1106	58	0.410714285714286	-6.61827272727273E-06
36_1	2003-03-24 00:00:00	25	10	72.25	0.00022064	992.22937	58	0.428571428571429	-4.35972727272727E-06
36_1	2003-03-24 01:00:00	26	11.5	72.25	0.00021933	992.41748	58	0.446428571428571	-1.81927272727273E-06
36_1	2003-03-24 02:00:00	27	13	72	0.00023117	991.91376	58	0.464285714285714	9.72454545454544E-07
36_1	2003-03-24 03:00:00	28	14.5	72	0.00022625	992.1781	58	0.482142857142857	3.76581818181818E-06
36_1	2003-03-24 04:00:00	29	16	72	0.0002172	992.24561	58	0.5	3.75445454545454E-06
36_1	2003-03-24 05:00:00	30	17	71.75	0.00022208	991.94934	58	0.517857142857143	5.88809090909091E-06
36_1	2003-03-24 06:00:00	31	18	71.5	0.00022897	992.01624	58	0.535714285714286	8.24709090909091E-06
36_1	2003-03-24 07:00:00	32	20	71.5	0.00024072	991.63562	58	0.553571428571429	9.58172727272727E-06
36_1	2003-03-24 08:00:00	33	22.5	71.5	0.0002498	991.67249	58	0.571428571428571	9.61527272727273E-06
36_1	2003-03-24 09:00:00	34	24	71.25	0.00026209	991.40875	58	0.589285714285714	8.59563636363637E-06
36_1	2003-03-24 10:00:00	35	24.5	71.25	0.00029665	990.26746	58	0.607142857142857	7.07690909090909E-06
36_1	2003-03-24 11:00:00	36	25.5	71.25	0.00031011	991.505	58	0.625	4.65027272727273E-06
36_1	2003-03-24 12:00:00	37	26.5	71	0.00030704	992.57245	58	0.642857142857143	1.69463636363637E-06
36_1	2003-03-24 13:00:00	38	28	70.75	0.00028175	993.77686	58	0.660714285714286	-1.45790909090909E-06
36_1	2003-03-24 14:00:00	39	29.5	70.5	0.0002746	994.44684	58	0.678571428571429	-4.43909090909091E-06
36_1	2003-03-24 15:00:00	40	30.5	70	0.00028415	993.73749	58	0.696428571428571	-7.81990909090909E-06
36_1	2003-03-24 16:00:00	41	31.5	69.75	0.00027171	994.03186	58	0.714285714285714	-8.96263636363636E-06
36_1	2003-03-24 17:00:00	42	32.5	69.5	0.00026173	994.72687	58	0.732142857142857	-8.55663636363637E-06
36_1	2003-03-24 18:00:00	43	33	69.25	0.00024985	995.24933	58	0.75	-7.458E-06
36_1	2003-03-24 19:00:00	44	33	68.75	0.00024455	995.70996	58	0.767857142857143	-6.578E-06
36_1	2003-03-24 20:00:00	45	34	68.5	0.00021996	996.32935	58	0.785714285714286	-4.73009090909091E-06
36_1	2003-03-24 21:00:00	46	34	68	0.0002193	997.30438	58	0.803571428571429	-1.75627272727273E-06
36_1	2003-03-24 22:00:00	47	34	67.25	0.00022175	996.91309	58	0.821428571428572	6.96181818181818E-07
36_1	2003-03-24 23:00:00	48	34.5	67	0.000223	997.76245	58	0.839285714285714	2.06572727272727E-06
36_1	2003-03-25 00:00:00	49	34.5	66.5	0.00023173	998.38312	58	0.857142857142857	2.40336363636363E-06
36_1	2003-03-25 01:00:00	50	35	66.25	0.0002516	998.97186	58	0.875	2.16427272727273E-06
36_1	2003-03-25 02:00:00	51	35.5	66	0.00026031	999.53125	58	0.892857142857143	-1.94181818181819E-07
36_1	2003-03-25 03:00:00	52	36	65.75	0.000259	1000.24249	58	0.910714285714286	-4.00318181818182E-06
36_1	2003-03-25 04:00:00	53	36.5	65.5	0.00024461	1000.97687	58	0.928571428571428	-8.94497668997671E-06
36_1	2003-03-25 05:00:00	54	37	65.25	0.00023274	1001.83685	58	0.946428571428571	-1.38867715617716E-05
36_1	2003-03-25 06:00:00	55	37	64.75	0.00022299	1002.17059	58	0.964285714285714	-1.88285664335665E-05
36_1	2003-03-25 07:00:00	56	37	64.5	0.00020156	1003.65625	58	0.982142857142857	-2.37703613053613E-05
36_1	2003-03-25 08:00:00	57	37.5	64.25	0.00016676	1004.29688	58	1	-2.87121561771562E-05
37_1	2003-10-23 19:00:00	1	18	75.25	0.00015181	1003.95184	21	0	2.27473193473206E-07
37_1	2003-10-23 20:00:00	2	17.5	75	0.00016424	1003.47937	21	0.047619047619048	1.33241491841493E-06
37_1	2003-10-23 21:00:00	3	18	74.5	0.00016603	1002.43622	21	0.095238095238095	2.43735664335665E-06
37_1	2003-10-23 22:00:00	4	18	74.25	0.00017963	1001.53308	21	0.142857142857143	3.54229836829837E-06
37_1	2003-10-23 23:00:00	5	19	73.75	0.00017115	999.65936	21	0.190476190476191	4.64724009324009E-06
37_1	2003-10-24 00:00:00	6	20	73.25	0.00016651	998.60809	21	0.238095238095238	5.75218181818182E-06
37_1	2003-10-24 01:00:00	7	20.5	72.75	0.00017194	997.02246	21	0.285714285714286	6.53645454545454E-06
37_1	2003-10-24 02:00:00	8	21	72.25	0.00018852	995.40936	21	0.333333333333333	8.01427272727273E-06
37_1	2003-10-24 03:00:00	9	21.5	72	0.00020132	994.37622	21	0.380952380952381	9.56527272727273E-06
37_1	2003-10-24 04:00:00	10	22	71.75	0.00020539	992.98938	21	0.428571428571429	1.11184545454545E-05
37_1	2003-10-24 05:00:00	11	22.5	71.5	0.00022055	992.20123	21	0.476190476190476	1.06326363636364E-05
37_1	2003-10-24 06:00:00	12	23.5	71.5	0.0002325	991.73688	21	0.523809523809524	8.98754545454545E-06
37_1	2003-10-24 07:00:00	13	23.5	71.25	0.00024898	990.92999	21	0.571428571428571	6.93372727272727E-06
37_1	2003-10-24 08:00:00	14	24	71.25	0.00026539	990.94934	21	0.619047619047619	5.138E-06
37_1	2003-10-24 09:00:00	15	24.5	71.25	0.00026899	990.89874	21	0.666666666666667	2.913E-06
37_1	2003-10-24 10:00:00	16	24.5	71	0.00025218	991.15186	21	0.714285714285714	-6.61636363636364E-07
37_1	2003-10-24 11:00:00	17	24.5	70.75	0.00024845	991.32996	21	0.761904761904762	-4.40036363636364E-06
37_1	2003-10-24 12:00:00	18	25	70.75	0.00024933	991.97937	21	0.80952380952381	-7.93644755244759E-06
37_1	2003-10-24 13:00:00	19	25.5	70.75	0.00025059	991.73749	21	0.857142857142857	-1.14725314685315E-05
37_1	2003-10-24 14:00:00	20	25.5	70.75	0.0002382	992.50061	21	0.904761904761905	-1.50086153846154E-05
37_1	2003-10-24 15:00:00	21	25	70.25	0.000211	992.92188	21	0.952380952380952	-1.85446993006994E-05
37_1	2003-10-24 16:00:00	22	25	70.5	0.00019032	993.77625	21	1	-2.20807832167833E-05
38_1	2003-12-05 06:00:00	1	13	74.25	0.00015575	993.34998	4	0	-3.25942857142855E-06
38_1	2003-12-05 07:00:00	2	13	74	0.00015557	993.92749	4	0.25	-9.73714285714281E-07
38_1	2003-12-05 08:00:00	3	13.5	73.5	0.00015755	994.17438	4	0.5	1.31200000000005E-06
38_1	2003-12-05 09:00:00	4	14	73.25	0.00015251	994.46558	4	0.75	3.59771428571426E-06
38_1	2003-12-05 10:00:00	5	14	72.75	0.00016384	993.50122	4	1	5.88342857142853E-06
39_1	2003-12-08 03:00:00	1	29	73	0.00024521	981.78436	26	0	-3.22689743589745E-06
39_1	2003-12-08 04:00:00	2	29	72.75	0.00024293	982.25372	26	0.038461538461539	1.83009324009305E-07
39_1	2003-12-08 05:00:00	3	29	72.5	0.00023918	983.24561	26	0.076923076923077	3.59291608391606E-06
39_1	2003-12-08 06:00:00	4	29	72.25	0.00023986	983.76562	26	0.115384615384615	7.00282284382282E-06
39_1	2003-12-08 07:00:00	5	29.5	72	0.00023932	984.17688	26	0.153846153846154	1.04127296037296E-05
39_1	2003-12-08 08:00:00	6	29.5	71.75	0.00024427	985.15186	26	0.192307692307692	1.38226363636364E-05
39_1	2003-12-08 09:00:00	7	29.5	71.5	0.00026114	986.12811	26	0.230769230769231	1.55169090909091E-05
39_1	2003-12-08 10:00:00	8	30	71.25	0.00034249	984.5506	26	0.269230769230769	1.69648181818182E-05
39_1	2003-12-08 11:00:00	9	30.5	71	0.00035398	984.73621	26	0.307692307692308	1.73312727272727E-05
39_1	2003-12-08 12:00:00	10	31	70.75	0.00034652	985.435	26	0.346153846153846	1.57848181818182E-05
39_1	2003-12-08 13:00:00	11	31.5	70.5	0.00035214	985.92688	26	0.384615384615385	1.28916363636364E-05
39_1	2003-12-08 14:00:00	12	31.5	70.25	0.00036443	986.82562	26	0.423076923076923	7.87527272727273E-06
39_1	2003-12-08 15:00:00	13	32	70	0.00038559	986.8006	26	0.461538461538462	2.02336363636364E-06
39_1	2003-12-08 16:00:00	14	32.5	69.75	0.00039483	987.21185	26	0.5	-1.47927272727273E-06
39_1	2003-12-08 17:00:00	15	33	69.5	0.00038306	987.33997	26	0.538461538461538	-4.449E-06
39_1	2003-12-08 18:00:00	16	33	69.25	0.00038272	988.44623	26	0.576923076923077	-9.45890909090909E-06
39_1	2003-12-08 19:00:00	17	33.5	69	0.00035875	989.3656	26	0.615384615384615	-1.46528181818182E-05
39_1	2003-12-08 20:00:00	18	34	68.75	0.00034302	990.54059	26	0.653846153846154	-1.80512727272727E-05
39_1	2003-12-08 21:00:00	19	34	68.5	0.00031346	991.56812	26	0.692307692307692	-1.92723636363636E-05
39_1	2003-12-08 22:00:00	20	34.5	68	0.00030559	991.7525	26	0.730769230769231	-1.92756363636364E-05
39_1	2003-12-08 23:00:00	21	34.5	67.75	0.00025998	993.04437	26	0.769230769230769	-1.92229090909091E-05
39_1	2003-12-09 00:00:00	22	34.5	67.25	0.00023188	994.31812	26	0.807692307692308	-1.854E-05
39_1	2003-12-09 01:00:00	23	34.5	66.75	0.00023258	995.59375	26	0.846153846153846	-1.70731934731935E-05
39_1	2003-12-09 02:00:00	24	34.5	66.5	0.00022872	996.9856	26	0.884615384615385	-1.5606386946387E-05
39_1	2003-12-09 03:00:00	25	34.5	66.25	0.00021305	998.13562	26	0.923076923076923	-1.41395804195804E-05
39_1	2003-12-09 04:00:00	26	35	66	0.00019205	999.11932	26	0.961538461538462	-1.26727738927739E-05
39_1	2003-12-09 05:00:00	27	35	65.75	0.00016812	1000.31183	26	1	-1.12059673659674E-05
40_1	2003-12-17 07:00:00	1	37.5	74	0.00016532	996.33875	24	0	3.46631934731936E-06
40_1	2003-12-17 08:00:00	2	38	74	0.00017339	996.12122	24	0.041666666666667	7.10867365967367E-06
40_1	2003-12-17 09:00:00	3	38.5	74	0.00018664	995.78375	24	0.083333333333333	1.0751027972028E-05
40_1	2003-12-17 10:00:00	4	40	73.75	0.00020613	994.08063	24	0.125	1.43933822843823E-05
40_1	2003-12-17 11:00:00	5	40.5	73.75	0.00022089	993.36121	24	0.166666666666667	1.80357365967366E-05
40_1	2003-12-17 12:00:00	6	41	73.75	0.00022678	992.46063	24	0.208333333333333	2.16780909090909E-05
40_1	2003-12-17 13:00:00	7	42	73.75	0.00024343	991.88312	24	0.25	2.44647272727273E-05
40_1	2003-12-17 14:00:00	8	43	73.5	0.00027908	990.14374	24	0.291666666666667	2.62483636363636E-05
40_1	2003-12-17 15:00:00	9	44	73.5	0.00031667	989.13123	24	0.333333333333333	2.78138181818182E-05
40_1	2003-12-17 16:00:00	10	44.5	73.5	0.00035583	988.3562	24	0.375	2.86307272727273E-05
40_1	2003-12-17 17:00:00	11	45.5	73.5	0.00038458	987.2356	24	0.416666666666667	2.80981818181818E-05
40_1	2003-12-17 18:00:00	12	46	73.5	0.00041467	986.71747	24	0.458333333333333	2.59970909090909E-05
40_1	2003-12-17 19:00:00	13	47	73.75	0.00043279	986.01624	24	0.5	2.24227272727273E-05
40_1	2003-12-17 20:00:00	14	48	73.75	0.00046397	985.16998	24	0.541666666666667	1.68437272727273E-05
40_1	2003-12-17 21:00:00	15	48.5	73.75	0.00047958	985.44312	24	0.583333333333333	9.02754545454545E-06
40_1	2003-12-17 22:00:00	16	49.5	73.75	0.00048687	985.32623	24	0.625	-8.42090909090909E-07
40_1	2003-12-17 23:00:00	17	50.5	73.75	0.00049849	985.0556	24	0.666666666666667	-1.1423E-05
40_1	2003-12-18 00:00:00	18	52	74	0.00050044	984.23749	24	0.708333333333334	-2.08262727272727E-05
40_1	2003-12-18 01:00:00	19	52.5	74	0.00046496	984.62933	24	0.75	-2.82167272727273E-05
40_1	2003-12-18 02:00:00	20	53.5	74	0.00040781	984.59375	24	0.791666666666667	-3.31374545454545E-05
40_1	2003-12-18 03:00:00	21	54	74	0.00033387	985.95874	24	0.833333333333333	-3.76298554778555E-05
40_1	2003-12-18 04:00:00	22	55.5	74.25	0.00027933	988.21558	24	0.875	-4.21222564102565E-05
40_1	2003-12-18 05:00:00	23	58	74.75	0.00024808	990	24	0.916666666666667	-4.66146573426574E-05
40_1	2003-12-18 06:00:00	24	59	74.75	0.0002373	990.26935	24	0.958333333333334	-5.11070582750584E-05
40_1	2003-12-18 07:00:00	25	60	75	0.00021512	990.76312	24	1	-5.55994592074593E-05
40_2	2003-12-17 11:00:00	1	37	71.75	0.00015412	993.92249	2	0	1.385E-05
40_2	2003-12-17 12:00:00	2	38	72	0.00016344	993.07935	2	0.5	4.78999999999998E-06
40_2	2003-12-17 13:00:00	3	39	72	0.0001637	992.95184	2	1	-4.26999999999998E-06
41_1	2003-12-26 11:00:00	1	29.5	75.25	0.00016628	992.7981	50	0	-1.41742937062937E-05
41_1	2003-12-26 12:00:00	2	29.5	75	0.00016734	991.76062	50	0.02	-8.34394405594405E-06
41_1	2003-12-26 13:00:00	3	28.5	75	0.00017377	992.24371	50	0.04	-2.5135944055944E-06
41_1	2003-12-26 14:00:00	4	28	75	0.00017473	992.54688	50	0.06	3.31675524475525E-06
41_1	2003-12-26 15:00:00	5	28	75	0.00016592	993.15436	50	0.08	9.1471048951049E-06
41_1	2003-12-26 16:00:00	6	28	74.75	0.00017038	991.73688	50	0.1	1.49774545454545E-05
41_1	2003-12-26 17:00:00	7	27.5	74.75	0.00018649	991.9856	50	0.12	1.99793636363636E-05
41_1	2003-12-26 18:00:00	8	27	74.5	0.00021637	990.62622	50	0.14	2.43494545454545E-05
41_1	2003-12-26 19:00:00	9	27	74.25	0.00025069	988.96747	50	0.16	2.72843636363636E-05
41_1	2003-12-26 20:00:00	10	26	74.25	0.00029858	988.72998	50	0.18	2.91004545454545E-05
41_1	2003-12-26 21:00:00	11	25.5	74.25	0.00032387	988.88495	50	0.2	2.846E-05
41_1	2003-12-26 22:00:00	12	25	74	0.00036939	986.36932	50	0.22	2.59341818181818E-05
41_1	2003-12-26 23:00:00	13	24	74	0.00039484	986.09937	50	0.24	2.16114545454545E-05
41_1	2003-12-27 00:00:00	14	23	74	0.00040105	986.18311	50	0.26	1.57506363636364E-05
41_1	2003-12-27 01:00:00	15	22.5	74	0.00042074	986.78558	50	0.28	9.12336363636364E-06
41_1	2003-12-27 02:00:00	16	22	74	0.00042647	986.57001	50	0.3	3.32527272727273E-06
41_1	2003-12-27 03:00:00	17	21	73.75	0.00043175	986.12311	50	0.32	-1.60090909090909E-06
41_1	2003-12-27 04:00:00	18	20.5	73.75	0.00042516	986.16309	50	0.34	-4.91181818181818E-06
41_1	2003-12-27 05:00:00	19	19.5	73.75	0.0004032	987.41058	50	0.36	-6.82545454545455E-06
41_1	2003-12-27 06:00:00	20	19	73.5	0.00038252	986.67621	50	0.38	-9.64354545454546E-06
41_1	2003-12-27 07:00:00	21	18	73.5	0.00036966	987.65186	50	0.4	-1.21076363636364E-05
41_1	2003-12-27 08:00:00	22	17.5	73.25	0.00037271	987.45996	50	0.42	-1.38825454545455E-05
41_1	2003-12-27 09:00:00	23	17	73.25	0.00036339	987.11249	50	0.44	-1.38241818181818E-05
41_1	2003-12-27 10:00:00	24	17	73	0.00036239	985.81311	50	0.46	-1.31879090909091E-05
41_1	2003-12-27 11:00:00	25	16.5	73	0.00032855	985.81122	50	0.48	-1.3236E-05
41_1	2003-12-27 12:00:00	26	16.5	72.75	0.00029821	984.88623	50	0.5	-1.36843636363636E-05
41_1	2003-12-27 13:00:00	27	16.5	72.5	0.00028199	984.52185	50	0.52	-1.37242727272727E-05
41_1	2003-12-27 14:00:00	28	16.5	72.5	0.00028709	984.30249	50	0.54	-1.24573636363636E-05
41_1	2003-12-27 15:00:00	29	16	72.5	0.00027878	983.82684	50	0.56	-1.06982727272727E-05
41_1	2003-12-27 16:00:00	30	16	72.5	0.0002608	983.32373	50	0.58	-7.91309090909091E-06
41_1	2003-12-27 17:00:00	31	16	72.5	0.00024833	983.03125	50	0.6	-5.54254545454545E-06
41_1	2003-12-27 18:00:00	32	15.5	72.5	0.00024591	982.59747	50	0.62	-3.66781818181818E-06
41_1	2003-12-27 19:00:00	33	15	72.5	0.00024625	982.35059	50	0.64	-1.93390909090909E-06
41_1	2003-12-27 20:00:00	34	14	72.5	0.00024297	981.91187	50	0.66	7.70909090909094E-08
41_1	2003-12-27 21:00:00	35	13	72.5	0.00024266	981.57874	50	0.68	1.54936363636364E-06
41_1	2003-12-27 22:00:00	36	12	72.5	0.0002502	980.82935	50	0.7	2.57972727272727E-06
41_1	2003-12-27 23:00:00	37	11	72.5	0.00026003	980.98438	50	0.72	3.463E-06
41_1	2003-12-28 00:00:00	38	10	72.25	0.00026876	980.15308	50	0.74	3.74045454545455E-06
41_1	2003-12-28 01:00:00	39	9	72	0.00026609	979.69183	50	0.76	3.46545454545455E-06
41_1	2003-12-28 02:00:00	40	8	71.75	0.00026001	979.63373	50	0.78	2.26E-06
41_1	2003-12-28 03:00:00	41	7.5	71.5	0.00026811	979.38623	50	0.8	4.84363636363637E-07
41_1	2003-12-28 04:00:00	42	6.5	71.25	0.0002813	979.54248	50	0.82	-1.44263636363637E-06
41_1	2003-12-28 05:00:00	43	6	70.75	0.00027747	979.07996	50	0.84	-1.90263636363636E-06
41_1	2003-12-28 06:00:00	44	5.5	70.5	0.00027122	979.1806	50	0.86	-2.44636363636364E-06
41_1	2003-12-28 07:00:00	45	5	70.25	0.00025968	979.6731	50	0.88	-3.66345454545455E-06
41_1	2003-12-28 08:00:00	46	5	69.75	0.00025085	979.62622	50	0.9	-5.72854545454546E-06
41_1	2003-12-28 09:00:00	47	5	69.25	0.00024011	980.01562	50	0.92	-6.78458275058274E-06
41_1	2003-12-28 10:00:00	48	5	69	0.00025857	979.79688	50	0.94	-7.84062004662003E-06
41_1	2003-12-28 11:00:00	49	5.5	68.5	0.00024596	980.01562	50	0.96	-8.89665734265732E-06
41_1	2003-12-28 12:00:00	50	5	68.25	0.00022979	981.70062	50	0.98	-9.95269463869461E-06
41_1	2003-12-28 13:00:00	51	5	68	0.00021117	982.3656	50	1	-1.10087319347319E-05
42_1	2003-12-28 11:00:00	1	21.5	72	0.00016961	971.58563	38	0	9.29211421911422E-06
42_1	2003-12-28 12:00:00	2	21	72	0.00017231	971.30682	38	0.026315789473684	9.92192773892774E-06
42_1	2003-12-28 13:00:00	3	20.5	72	0.00017426	971.05811	38	0.052631578947369	1.05517412587413E-05
42_1	2003-12-28 14:00:00	4	17.5	72.5	0.00017441	972.54688	38	0.078947368421053	1.11815547785548E-05
42_1	2003-12-28 15:00:00	5	16	72.25	0.00020225	972.44061	38	0.105263157894737	1.18113682983683E-05
42_1	2003-12-28 16:00:00	6	16	72.25	0.00022281	972.28308	38	0.131578947368421	1.24411818181818E-05
42_1	2003-12-28 17:00:00	7	15	72	0.00023439	972.25995	38	0.157894736842105	1.18895454545455E-05
42_1	2003-12-28 18:00:00	8	14.5	71.75	0.00024464	971.94562	38	0.18421052631579	1.11797272727273E-05
42_1	2003-12-28 19:00:00	9	13.5	71.5	0.0002592	972.26495	38	0.210526315789474	1.00209090909091E-05
42_1	2003-12-28 20:00:00	10	13	71.25	0.0002729	972.53748	38	0.236842105263158	7.97190909090909E-06
42_1	2003-12-28 21:00:00	11	12.5	71.25	0.00027736	973.58807	38	0.263157894736842	6.39254545454545E-06
42_1	2003-12-28 22:00:00	12	12.5	71.25	0.00026516	973.7287	38	0.289473684210526	5.01109090909091E-06
42_1	2003-12-28 23:00:00	13	12	71	0.00027755	974.70935	38	0.31578947368421	3.56045454545455E-06
42_1	2003-12-29 00:00:00	14	11.5	71	0.00028638	975.81934	38	0.342105263157895	2.46109090909091E-06
42_1	2003-12-29 01:00:00	15	11	70.75	0.00028904	976.80621	38	0.368421052631579	2.22927272727273E-06
42_1	2003-12-29 02:00:00	16	11	70.5	0.00028889	976.88184	38	0.394736842105263	2.72827272727273E-06
42_1	2003-12-29 03:00:00	17	10.5	70.5	0.0002859	978.0556	38	0.421052631578947	3.13209090909091E-06
42_1	2003-12-29 04:00:00	18	10.5	70.25	0.0002831	977.97437	38	0.447368421052632	2.61709090909091E-06
42_1	2003-12-29 05:00:00	19	10	70	0.00028827	978.67499	38	0.473684210526316	2.45345454545455E-06
42_1	2003-12-29 06:00:00	20	10	69.75	0.00029861	978.92371	38	0.5	2.02327272727273E-06
42_1	2003-12-29 07:00:00	21	10	69.5	0.00030613	978.90686	38	0.526315789473684	2.36181818181818E-06
42_1	2003-12-29 08:00:00	22	10.5	69	0.00030533	978.65308	38	0.552631578947368	4.07954545454545E-06
42_1	2003-12-29 09:00:00	23	10.5	68.75	0.00030535	979.33807	38	0.578947368421053	6.56309090909091E-06
42_1	2003-12-29 10:00:00	24	10	68.75	0.00030625	980.04688	38	0.605263157894737	7.76463636363637E-06
42_1	2003-12-29 11:00:00	25	13	68.5	0.00029553	978.06311	38	0.631578947368421	7.71663636363637E-06
42_1	2003-12-29 12:00:00	26	13.5	68.5	0.00031108	977.39374	38	0.657894736842105	6.63381818181818E-06
42_1	2003-12-29 13:00:00	27	14	68.5	0.00034601	976.96808	38	0.68421052631579	4.81E-06
42_1	2003-12-29 14:00:00	28	14	68.25	0.00037787	977.37811	38	0.710526315789474	2.28081818181818E-06
42_1	2003-12-29 15:00:00	29	14.5	68.25	0.00037142	977.19745	38	0.736842105263158	-1.25336363636363E-06
42_1	2003-12-29 16:00:00	30	14.5	68.25	0.00035539	977.27625	38	0.763157894736842	-5.67045454545454E-06
42_1	2003-12-29 17:00:00	31	14.5	68	0.00033364	977.58746	38	0.789473684210526	-1.08311818181818E-05
42_1	2003-12-29 18:00:00	32	14.5	67.75	0.00031532	978.76434	38	0.815789473684211	-1.52657272727273E-05
42_1	2003-12-29 19:00:00	33	15	68	0.0003026	978.7962	38	0.842105263157895	-1.78929090909091E-05
42_1	2003-12-29 20:00:00	34	15	67.75	0.00027992	979.70496	38	0.868421052631579	-1.89574545454545E-05
42_1	2003-12-29 21:00:00	35	15.5	68	0.00025433	980.51312	38	0.894736842105263	-1.92214638694639E-05
42_1	2003-12-29 22:00:00	36	15.5	68	0.00024045	981.42621	38	0.921052631578947	-1.94854731934732E-05
42_1	2003-12-29 23:00:00	37	15	67.75	0.00022675	982.66125	38	0.947368421052632	-1.97494825174825E-05
42_1	2003-12-30 00:00:00	38	15	67.75	0.00020773	984.56311	38	0.973684210526316	-2.00134918414919E-05
42_1	2003-12-30 01:00:00	39	15.5	67.75	0.00017622	985.66498	38	1	-2.02775011655012E-05
42_2	2003-12-29 02:00:00	1	16.5	70.25	0.00023836	971.96686	8	0	2.60822510822561E-07
42_2	2003-12-29 03:00:00	2	16.5	70.25	0.00023607	972.48938	8	0.125	5.33116883116927E-07
42_2	2003-12-29 04:00:00	3	16.5	70.5	0.00023288	973.09686	8	0.25	8.05411255411293E-07
42_2	2003-12-29 05:00:00	4	16	70.5	0.00023162	973.32495	8	0.375	1.07770562770566E-06
42_2	2003-12-29 06:00:00	5	16	70.5	0.00023907	974.185	8	0.5	1.35E-06
42_2	2003-12-29 07:00:00	6	15.5	70.5	0.00024366	974.93311	8	0.625	1.62229437229439E-06
42_2	2003-12-29 08:00:00	7	15	70.5	0.00024697	975.74933	8	0.75	1.89458874458876E-06
42_2	2003-12-29 09:00:00	8	14	70.25	0.00024413	976.5506	8	0.875	2.16688311688312E-06
42_2	2003-12-29 10:00:00	9	14	70.25	0.00024251	976.98059	8	1	2.43917748917749E-06
43_1	2004-01-27 06:00:00	1	10.5	70.5	0.0001502	992.61621	17	0	7.89495104895107E-06
43_1	2004-01-27 07:00:00	2	10	70.25	0.00016323	992.13812	17	0.058823529411765	7.19606993006995E-06
43_1	2004-01-27 08:00:00	3	10	70	0.00017286	991.67438	17	0.117647058823529	6.49718881118883E-06
43_1	2004-01-27 09:00:00	4	9.5	70	0.00017683	991.44501	17	0.176470588235294	5.7983076923077E-06
43_1	2004-01-27 10:00:00	5	9	70	0.00019214	989.64313	17	0.235294117647059	5.09942657342658E-06
43_1	2004-01-27 11:00:00	6	8.5	69.75	0.00018875	989.56372	17	0.294117647058823	4.40054545454546E-06
43_1	2004-01-27 12:00:00	7	8	69.75	0.00018491	989.59247	17	0.352941176470588	3.49427272727273E-06
43_1	2004-01-27 13:00:00	8	7.5	69.5	0.00018216	989.09247	17	0.411764705882353	2.91463636363636E-06
43_1	2004-01-27 14:00:00	9	7	69.75	0.00019084	989.6662	17	0.470588235294118	2.67709090909091E-06
43_1	2004-01-27 15:00:00	10	6	69.75	0.00020424	990.38745	17	0.529411764705882	2.64854545454545E-06
43_1	2004-01-27 16:00:00	11	5.5	69.5	0.00020273	989.8631	17	0.588235294117647	3.41181818181818E-06
43_1	2004-01-27 17:00:00	12	4.5	69.5	0.0002016	990.4837	17	0.647058823529412	1.27181818181818E-06
43_1	2004-01-27 18:00:00	13	5.5	68.5	0.00020343	988.60248	17	0.705882352941176	-1.54236363636364E-06
43_1	2004-01-27 19:00:00	14	5.5	68.25	0.00020744	988.14813	17	0.764705882352941	-5.00488111888114E-06
43_1	2004-01-27 20:00:00	15	5	68	0.00021419	988.27435	17	0.823529411764706	-8.46739860139862E-06
43_1	2004-01-27 21:00:00	16	5	67.75	0.00022071	988.07623	17	0.882352941176471	-1.19299160839161E-05
43_1	2004-01-27 22:00:00	17	5.5	67.5	0.00016662	988.41309	17	0.941176470588235	-1.53924335664336E-05
43_1	2004-01-27 23:00:00	18	5	67.25	0.00015197	989.0675	17	1	-1.88549510489511E-05
43_2	2004-01-26 21:00:00	1	15.5	72.75	0.0001584	996.99188	15	0	4.89391818181819E-05
43_2	2004-01-26 22:00:00	2	16	72.75	0.00018922	995.59125	15	0.066666666666667	4.30291818181818E-05
43_2	2004-01-26 23:00:00	3	16	72.75	0.00019415	995.16998	15	0.133333333333333	3.71191818181818E-05
43_2	2004-01-27 00:00:00	4	15.5	72.75	0.00022916	994.76813	15	0.2	3.12091818181818E-05
43_2	2004-01-27 01:00:00	5	15.5	72.75	0.00027288	993.97058	15	0.266666666666667	2.52991818181818E-05
43_2	2004-01-27 02:00:00	6	15	72.75	0.00030412	994.04749	15	0.333333333333333	1.93891818181818E-05
43_2	2004-01-27 03:00:00	7	15	73	0.00033861	993.91187	15	0.4	1.29092727272727E-05
43_2	2004-01-27 04:00:00	8	14.5	73	0.00035851	993.29559	15	0.466666666666667	5.552E-06
43_2	2004-01-27 05:00:00	9	14	73	0.00035844	993.47308	15	0.533333333333333	-3.43872727272727E-06
43_2	2004-01-27 06:00:00	10	13	73	0.00033611	993.51495	15	0.6	-1.20389090909091E-05
43_2	2004-01-27 07:00:00	11	12	73	0.00030399	993.9931	15	0.666666666666667	-1.91061818181818E-05
43_2	2004-01-27 08:00:00	12	11	73	0.00027608	994.45435	15	0.733333333333333	-2.54603076923077E-05
43_2	2004-01-27 09:00:00	13	10	73	0.00024333	995.27875	15	0.8	-3.18144335664336E-05
43_2	2004-01-27 10:00:00	14	9.5	73	0.0002123	995.9306	15	0.866666666666667	-3.81685594405595E-05
43_2	2004-01-27 11:00:00	15	9	73	0.00018251	996.4837	15	0.933333333333333	-4.45226853146853E-05
43_2	2004-01-27 12:00:00	16	7.5	72.75	0.00015444	996.97375	15	1	-5.08768111888112E-05
43_3	2004-01-27 09:00:00	1	17	72.25	0.0001691	991.92371	2	0	5.88049999999999E-05
43_3	2004-01-27 10:00:00	2	16.5	72.25	0.00021019	990.78687	2	0.5	2.3375E-05
43_3	2004-01-27 11:00:00	3	15.5	72.25	0.00021585	990.5675	2	1	-1.20549999999998E-05
43_5	2004-01-27 11:00:00	1	20.5	72	0.00020569	990.5675	8	0	3.60793744588745E-05
43_5	2004-01-27 12:00:00	2	19.5	72.25	0.0002454	990.09625	8	0.125	3.23263225108226E-05
43_5	2004-01-27 13:00:00	3	18	72.5	0.00027111	989.84998	8	0.25	2.85732705627706E-05
43_5	2004-01-27 14:00:00	4	17	72.5	0.00029244	989.3587	8	0.375	2.48202186147186E-05
43_5	2004-01-27 15:00:00	5	16.5	72.75	0.00031289	989.94501	8	0.5	2.10671666666667E-05
43_5	2004-01-27 16:00:00	6	14.5	72.75	0.00033963	990.08563	8	0.625	1.73141147186147E-05
43_5	2004-01-27 17:00:00	7	13	72.75	0.00036619	990.88745	8	0.75	1.35610627705627E-05
43_5	2004-01-27 18:00:00	8	12	72.75	0.00037208	991.95746	8	0.875	9.80801082251078E-06
43_5	2004-01-27 19:00:00	9	11	72.75	0.00036735	993.11932	8	1	6.05495887445882E-06
43_6	2004-01-27 20:00:00	1	6.5	71.25	0.00036157	991.17438	4	0	2.39815714285714E-05
43_6	2004-01-27 21:00:00	2	6	71.25	0.00036522	992.07874	4	0.25	4.11728571428568E-06
43_6	2004-01-27 22:00:00	3	5.5	71.25	0.00037142	993.66309	4	0.5	-1.57469999999999E-05
43_6	2004-01-27 23:00:00	4	4.5	70.75	0.00034251	993.54498	4	0.75	-3.56112857142858E-05
43_6	2004-01-28 00:00:00	5	3.5	70	0.00029419	992.48871	4	1	-5.54755714285715E-05
43_7	2004-01-27 01:00:00	1	8.5	64.75	0.00018012	997.27313	48	0	2.37808764568765E-05
43_7	2004-01-27 02:00:00	2	9	64.5	0.00021912	996.32123	48	0.020833333333333	1.85731375291375E-05
43_7	2004-01-27 03:00:00	3	9.5	64.5	0.00023281	994.71307	48	0.041666666666667	1.33653986013986E-05
43_7	2004-01-27 04:00:00	4	10	64.25	0.00022313	994.79938	48	0.0625	8.15765967365966E-06
43_7	2004-01-27 05:00:00	5	11	64.75	0.00022691	992.89813	48	0.083333333333333	2.94992074592073E-06
43_7	2004-01-27 06:00:00	6	11.5	65.25	0.00023386	991.88123	48	0.104166666666667	-2.25781818181818E-06
43_7	2004-01-27 07:00:00	7	12	65.5	0.00023903	991.17938	48	0.125	-6.01736363636364E-06
43_7	2004-01-27 08:00:00	8	12.5	66	0.00024087	990.83063	48	0.145833333333333	-7.25872727272727E-06
43_7	2004-01-27 09:00:00	9	12.5	66.25	0.00023019	990.48999	48	0.166666666666667	-6.63890909090909E-06
43_7	2004-01-27 10:00:00	10	12.5	66.75	0.00015642	989.22937	48	0.1875	-5.91890909090909E-06
43_7	2004-01-27 11:00:00	11	12.5	67.25	0.00017266	988.8175	48	0.208333333333333	-4.94209090909091E-06
43_7	2004-01-27 12:00:00	12	13	67.75	0.00017217	988.42999	48	0.229166666666667	-3.45127272727273E-06
43_7	2004-01-27 13:00:00	13	13	67.75	0.00017918	987.97125	48	0.25	-1.41527272727273E-06
43_7	2004-01-27 14:00:00	14	13	68	0.00019571	987.87122	48	0.270833333333333	1.11036363636364E-06
43_7	2004-01-27 15:00:00	15	13	68.25	0.00020211	987.99622	48	0.291666666666667	3.56763636363636E-06
43_7	2004-01-27 16:00:00	16	13	68.5	0.00019902	987.91937	48	0.3125	1.90254545454545E-06
43_7	2004-01-27 17:00:00	17	12.5	68.75	0.00019641	987.8125	48	0.333333333333333	1.66245454545454E-06
43_7	2004-01-27 18:00:00	18	12.5	69	0.00019471	988.08875	48	0.354166666666667	1.50763636363636E-06
43_7	2004-01-27 19:00:00	19	12	69.25	0.00019441	988.25934	48	0.375	1.15818181818182E-06
43_7	2004-01-27 20:00:00	20	11.5	69.25	0.00019643	988.63434	48	0.395833333333333	1.608E-06
43_7	2004-01-27 21:00:00	21	11.5	69.5	0.00018751	989.35498	48	0.416666666666667	2.76527272727273E-06
43_7	2004-01-27 22:00:00	22	10	69.5	0.00020559	987.57812	48	0.4375	3.63527272727273E-06
43_7	2004-01-27 23:00:00	23	9	69.25	0.00021464	987.70746	48	0.458333333333333	3.94945454545454E-06
43_7	2004-01-28 00:00:00	24	8.5	69.25	0.00021044	988.16248	48	0.479166666666667	3.98690909090909E-06
43_7	2004-01-28 01:00:00	25	7.5	68.75	0.00021444	987.85126	48	0.5	3.89472727272727E-06
43_7	2004-01-28 02:00:00	26	7	68.75	0.00022607	988.56622	48	0.520833333333333	3.55354545454546E-06
43_7	2004-01-28 03:00:00	27	6.5	68.75	0.00022825	988.68933	48	0.541666666666667	1.87427272727273E-06
43_7	2004-01-28 04:00:00	28	6	68.5	0.000225	989.01495	48	0.5625	2.50727272727274E-07
43_7	2004-01-28 05:00:00	29	5.5	68.25	0.00022667	989.16809	48	0.583333333333333	-8.22545454545454E-07
43_7	2004-01-28 06:00:00	30	5.5	68	0.00023057	989.12622	48	0.604166666666667	-1.59527272727273E-06
43_7	2004-01-28 07:00:00	31	5	67.75	0.0002299	989.44373	48	0.625	-1.89954545454545E-06
43_7	2004-01-28 08:00:00	32	4.5	67.5	0.00021786	989.64313	48	0.645833333333333	-2.04681818181818E-06
43_7	2004-01-28 09:00:00	33	4.5	67.25	0.00020346	989.76373	48	0.666666666666667	-2.20745454545455E-06
43_7	2004-01-28 10:00:00	34	4	66.75	0.00020428	988.66809	48	0.6875	-1.84381818181818E-06
43_7	2004-01-28 11:00:00	35	4.5	66.75	0.00021386	989.21625	48	0.708333333333334	-9.25000000000001E-07
43_7	2004-01-28 12:00:00	36	4	66.25	0.00022005	990.12	48	0.729166666666667	6.40454545454545E-07
43_7	2004-01-28 13:00:00	37	4	66.25	0.00021067	989.88873	48	0.75	2.02509090909091E-06
43_7	2004-01-28 14:00:00	38	4	66.25	0.00020468	990.45874	48	0.770833333333333	2.61363636363636E-06
43_7	2004-01-28 15:00:00	39	3.5	66	0.0002154	990.7381	48	0.791666666666667	1.59036363636364E-06
43_7	2004-01-28 16:00:00	40	3	65.5	0.00022369	991.07184	48	0.8125	-1.30545454545454E-07
43_7	2004-01-28 17:00:00	41	3	65.25	0.00023264	991.22308	48	0.833333333333333	8.11545454545454E-07
43_7	2004-01-28 18:00:00	42	2.5	64.75	0.00022988	991.54437	48	0.854166666666667	9.54909090909091E-07
43_7	2004-01-28 19:00:00	43	2.5	64.5	0.00022681	991.77997	48	0.875	-6.27E-07
43_7	2004-01-28 20:00:00	44	2.5	64.25	0.00021042	992.11121	48	0.895833333333333	-3.323E-06
43_7	2004-01-28 21:00:00	45	2	63.75	0.00019548	992.64563	48	0.916666666666667	-5.25300000000003E-06
43_7	2004-01-28 22:00:00	46	2	63.5	0.00024081	991.84558	48	0.9375	-7.18300000000003E-06
43_7	2004-01-28 23:00:00	47	2	63	0.0002212	991.35248	48	0.958333333333334	-9.11300000000004E-06
43_7	2004-01-29 00:00:00	48	2	62.75	0.00019473	991.67938	48	0.979166666666667	-1.1043E-05
43_7	2004-01-29 01:00:00	49	2	62.5	0.00017422	991.33185	48	1	-1.2973E-05
43_8	2004-01-28 10:00:00	1	0	65.5	0.00029384	991.69562	3	0	-5.05150000000001E-05
43_8	2004-01-28 11:00:00	2	0	64.5	0.00025255	991.09375	3	0.333333333333333	-3.2065E-05
43_8	2004-01-28 12:00:00	3	0	63.75	0.00022971	991.92249	3	0.666666666666667	-1.96E-06
43_8	2004-01-28 13:00:00	4	0.5	62.75	0.00024863	990.9162	3	1	3.98E-05
43_9	2004-01-28 14:00:00	1	0.5	61.25	0.00031693	991.26123	7	0	-2.01525E-05
43_9	2004-01-28 15:00:00	2	0.5	61	0.00032477	991.06183	7	0.142857142857143	-1.76808333333334E-05
43_9	2004-01-28 16:00:00	3	0.5	60.25	0.00029355	991.10809	7	0.285714285714286	-1.52091666666667E-05
43_9	2004-01-28 17:00:00	4	0.5	60	0.0002685	991.27435	7	0.428571428571429	-1.27375E-05
43_9	2004-01-28 18:00:00	5	1	59	0.00026503	991.12061	7	0.571428571428571	-1.33221428571429E-05
43_9	2004-01-28 19:00:00	6	1	58.5	0.00025543	991.65125	7	0.714285714285714	-9.78785714285722E-06
43_9	2004-01-28 20:00:00	7	1.5	57.25	0.00025378	992.01624	7	0.857142857142857	-6.25357142857153E-06
43_9	2004-01-28 21:00:00	8	1.5	56.75	0.0002313	992.70435	7	1	-2.71928571428585E-06
43_10	2004-01-28 23:00:00	1	3	55.75	0.00017538	991.04498	18	0	1.64442284382285E-05
43_10	2004-01-29 00:00:00	2	3.5	55.25	0.00018133	991.0506	18	0.055555555555556	1.352931002331E-05
43_10	2004-01-29 01:00:00	3	4	55	0.00017828	991.23309	18	0.111111111111111	1.06143916083916E-05
43_10	2004-01-29 02:00:00	4	5	54.75	0.00018447	990.79248	18	0.166666666666667	7.69947319347319E-06
43_10	2004-01-29 03:00:00	5	5.5	54.25	0.00020427	990.84186	18	0.222222222222222	4.78455477855477E-06
43_10	2004-01-29 04:00:00	6	6	53.75	0.00021989	991.41998	18	0.277777777777778	1.86963636363636E-06
43_10	2004-01-29 05:00:00	7	6.5	53.5	0.00022766	991.65308	18	0.333333333333333	6.11772727272727E-06
43_10	2004-01-29 06:00:00	8	7	53.5	0.00021786	991.51746	18	0.388888888888889	7.18545454545454E-06
43_10	2004-01-29 07:00:00	9	7.5	53.25	0.0001962	992.13	18	0.444444444444444	5.64109090909091E-06
43_10	2004-01-29 08:00:00	10	8	53	0.00018105	993.18433	18	0.5	2.83436363636364E-06
43_10	2004-01-29 09:00:00	11	9	53	0.00018795	993.69873	18	0.555555555555556	1.47090909090909E-07
43_10	2004-01-29 10:00:00	12	9.5	52.75	0.00031387	993.71063	18	0.611111111111111	-1.76827272727273E-06
43_10	2004-01-29 11:00:00	13	10	53	0.00026446	993.97186	18	0.666666666666667	-3.33863636363636E-06
43_10	2004-01-29 12:00:00	14	10.5	52.75	0.00022728	994.44745	18	0.722222222222222	-5.63518181818182E-06
43_10	2004-01-29 13:00:00	15	11	52.75	0.00020188	995.32684	18	0.777777777777778	-1.14608927738928E-05
43_10	2004-01-29 14:00:00	16	11.5	52.75	0.00018423	995.91748	18	0.833333333333333	-1.72866037296038E-05
43_10	2004-01-29 15:00:00	17	12	53	0.00017846	996.06183	18	0.888888888888889	-2.31123146853148E-05
43_10	2004-01-29 16:00:00	18	12.5	53	0.00016844	996.85999	18	0.944444444444444	-2.89380256410257E-05
43_10	2004-01-29 17:00:00	19	13.5	52.75	0.00015238	997.87372	18	1	-3.47637365967367E-05
44_1	2004-01-29 20:00:00	1	3.5	68.25	0.00015974	993.14624	51	0	-1.13345687645686E-06
44_1	2004-01-29 21:00:00	2	3.5	68.25	0.00016569	992.71246	51	0.019607843137255	-1.26347319347307E-07
44_1	2004-01-29 22:00:00	3	3	68.5	0.00017886	992.28375	51	0.03921568627451	8.80762237762246E-07
44_1	2004-01-29 23:00:00	4	2.5	68.75	0.00017488	991.9375	51	0.058823529411765	1.8878717948718E-06
[truncated: 11,345 more rows]
